# Supplementary material for: Conserved structure and inferred evolutionary history of long terminal repeats (LTRs)
Source: PubMed Central journal article supplement (PMC3601003; doi:10.1186/1759-8753-4-5), 2013-02-01
Supplement: 1759-8753-4-5-S1.pdf [file 1759-8753-4-5-S1.pdf]

The last two letters refer to host species,  
see abbreviations at the bottom of the table

### **Zam**

| Name           | Length |
|----------------|--------|
| GYPSY43_LTR_AG | 196    |
| TED_LTR        | 273    |
| GYPSY41_LTR_AG | 311    |
| GYPSY40_LTR_AG | 167    |
| GYPSY39_LTR_AG | 353    |
| GYPSY42_LTR_AG | 251    |
| PIFO_LTR       | 444    |
| GYPSY8_LTR_DYA | 337    |
| Median length  | 292    |

### **Mag C**

| Name            | Length |
|-----------------|--------|
| GYPSY-7_LTR_HM  | 305    |
| GYPSY-16_LTR_HM | 136    |
| GYPSY58_LTR_DR  | 144    |
| GYPSY143_LTR_DR | 148    |
| GYPSY14_LTR_SP  | 118    |
| GYPSY1_LTR_SP   | 159    |
| GYPSY6_LTR_SP   | 160    |
| GYPSY-15_LTR_HM | 86     |
| GYPSY3_LTR_SP   | 168    |
| GYPSY55_LTR_DR  | 240    |
| GYPSY141_LTR_DR | 197    |
| GYPSY21_LTR_SP  | 180    |
| GYPSY68_LTR_DR  | 190    |
| GYPSY93_LTR_DR  | 249    |
| GYPSY12_LTR_SP  | 125    |
| GYPSY53_LTR_DR  | 222    |
| Median length   | 164    |

### **Mag A**

|                |     |
|----------------|-----|
| GYPSY59_LTR_AG | 288 |
| GYPSY58_LTR_AG | 289 |
| GYPSY28_LTR_AG | 219 |
| GYPSY19_LTR_AG | 136 |
| GYPSY66_LTR_AG | 197 |
| GYPSY57_LTR_AG | 296 |
| GYPSY24_LTR_AG | 192 |
| GYPSY64_LTR_AG | 187 |
| GYPSY23_LTR_AG | 162 |
| GYPSY25_LTR_AG | 234 |
| GYPSY62_LTR_AG | 178 |
| GYPSY3_LTR_AG  | 141 |
| GYPSY69_LTR_AG | 441 |
| GYPSY21_LTR_AG | 167 |
| GYPSY60_LTR_AG | 220 |
| GYPSY67_LTR_AG | 236 |
| GYPSY63_LTR_AG | 144 |
| GYPSY68_LTR_AG | 108 |

|                |     |
|----------------|-----|
| GYPSY20_LTR_AG | 270 |
| GYPSY65_LTR_AG | 140 |

|               |     |
|---------------|-----|
| Median length | 195 |
|---------------|-----|

### **CsRN1**

|                  |     |
|------------------|-----|
| GYPSY70_LTR_AG   | 355 |
| GYPSY2_LTR_AG    | 368 |
| GYPSY1-NVI_LTR   | 259 |
| GYPSY1_LTR_AP    | 321 |
| GYPSY53_LTR_AG   | 300 |
| GYPSY48_LTR_AG   | 374 |
| GYPSY9_LTR_AP    | 385 |
| BOUDICCA_LTR     | 327 |
| GYPSY11-NVI_LTR  | 306 |
| GYPSY2_LTR_AP    | 407 |
| GYPSY1_LTR_AG    | 146 |
| GYPSY-29_LTR_NVI | 409 |
| GYPSY52_LTR_AG   | 393 |

|               |     |
|---------------|-----|
| Median length | 355 |
|---------------|-----|

### **Sushi**

|                  |     |
|------------------|-----|
| GYPSY70_LTR_DR   | 640 |
| GYPSY72_LTR_DR   | 596 |
| GYPSY76_LTR_DR   | 460 |
| GYPSY107_LTR_DR  | 770 |
| GYPSY105_LTR_DR  | 782 |
| GYPSY62_LTR_DR   | 475 |
| GYPSY1_LTR_GA    | 527 |
| GYPSY4_LTR_AO    | 669 |
| CGRET_LTR        | 544 |
| GYPSY5_LTR_DR    | 458 |
| GYPSY89_LTR_DR   | 559 |
| GYPSY96_LTR_DR   | 816 |
| GYPSY103_LTR_DR  | 819 |
| GYPSY88_LTR_DR   | 521 |
| MARY1_LTR        | 426 |
| GYPSY104_LTR_DR  | 870 |
| GYPSY-115_LTR_DR | 378 |
| GYPSY-170_LTR_DR | 898 |
| GYPSY145_LTR_DR  | 311 |
| GYPSY164_LTR_DR  | 381 |
| GYPSY159_LTR_DR  | 458 |
| GYPSY69_LTR_DR   | 408 |
| GYPSY138_LTR_DR  | 137 |
| GYPSY64_LTR_DR   | 835 |

|               |     |
|---------------|-----|
| Median length | 536 |
|---------------|-----|

### **rGmr1**

|                  |     |
|------------------|-----|
| GYPSY-34_LTR_DR  | 960 |
| GYPSY-167_LTR_DR | 878 |
| GYPSY90_LTR_DR   | 385 |
| GYPSY47_LTR_DR   | 969 |
| GYPSY123_LTR_DR  | 320 |

|                  |      |
|------------------|------|
| GYPSY-171_LTR_DR | 824  |
| GYPSY41_LTR_DR   | 890  |
| GYPSY48_LTR_DR   | 967  |
| GYPSY44_LTR_DR   | 699  |
| GYPSYDR1_LTR     | 387  |
| GYPSY36_LTR_DR   | 390  |
| GYPSY-116_LTR_DR | 738  |
| GYPSY49_LTR_DR   | 360  |
| GYPSY-169_LTR_DR | 306  |
| GYPSY-24_LTR_SP  | 1023 |
| GYPSY38_LTR_DR   | 416  |
| GYPSY40_LTR_DR   | 936  |
| GYPSY43_LTR_DR   | 794  |
| GYPSY139_LTR_DR  | 399  |
| GYPSY46_LTR_DR   | 331  |
| GYPSY-33_LTR_DR  | 1080 |
| GYPSY120_LTR_DR  | 1036 |
| GYPSY121_LTR_DR  | 327  |
| GYPSY91_LTR_DR   | 294  |
| GYPSY-32_LTR_DR  | 1160 |
| GYPSOL_LTR       | 692  |
| GYPSY37_LTR_DR   | 372  |
| GYPSY124_LTR_DR  | 623  |
| GYPSY155_LTR_DR  | 780  |
| GYPSY17_LTR_SP   | 810  |
| GYPSY-117_LTR_DR | 748  |
| GYPSY-31_LTR_DR  | 954  |
| GYPSY45_LTR_DR   | 898  |
| GYPSY35_LTR_DR   | 900  |
| Median length    | 764  |

### **Abbreviations**

AG: Anopheles Gambiae  
DYA: Drosophila yakuba  
HM: Hydra magnipapillata  
DR: Danio rerio  
SP: Strongylocentrotus purpuratus  
NVI: Nasonia vitripennis  
AP: Acyrthosiphon pisum  
GA: Gasterosteus aculeatus  
AO: Aspergillus oryzae

These are the Metaviridae (gypsy/Ty3) clusters based on Pol similarity, as described in the main text.

### **CsRN1**

GYPSY49-I\_AG\_2  
GYPSY52-I\_AG\_1  
GYPSY70-I\_AG\_2  
GYPSY2-I\_AG  
GYPSY1-I\_AG\_2  
GYPSY48-I\_AG\_2  
boudicca\_I  
SACI-7\_2  
Gypsy9-I\_AP\_2  
Gypsy1-I\_AP  
Chimpo\_I\_2  
GYPSY53-I\_AG\_1  
Gypsy-29-I\_NVi\_2  
Gypsy16-I\_SP  
Gypsy7-I\_AP  
Gypsy-25-I\_NVi  
Gypsy1-NVi\_I  
Gypsy2-I\_AP  
Gypsy11-NVi\_I\_2

### **mdg1\_AG**

GYPSY10-I\_AG\_2  
GYPSY9-I\_AG\_2  
GYPSY13-I\_AG\_2  
GYPSY17-I\_AG\_2  
GYPSY16-I\_AG\_2  
GYPSY14-I\_AG\_2  
GYPSY8-I\_AG\_1  
GYPSY12-I\_AG\_2  
GYPSY11-I\_AG\_2  
GYPSY15-I\_AG\_1

### **rGmr1**

Gypsy39-I\_DR  
Gypsy-169-I\_DR  
Gypsy44-I\_DR  
Gypsy-34-I\_DR  
Gypsy47-I\_DR  
Gypsy40-I\_DR  
Gypsy37-I\_DR  
Gypsy43-I\_DR  
Gypsy-24-I\_SP  
Gypsy-116-I\_DR  
GYPSYDR1  
Gypsy148-I\_DR  
Gypsy-117-I\_DR  
Gypsy48-I\_DR  
rGmr1\_I  
Gypsy90-I\_DR  
Gypsy41-I\_DR  
Gypsy46-I\_DR

Gypsy139-I\_DR\_2  
Gypsy36-I\_DR  
Gypsy-171-I\_DR  
Gypsy-33-I\_DR  
Gypsy38-I\_DR  
Gypsy-167-I\_DR\_2  
Gypsy127-I\_DR  
Gypsy45-I\_DR  
Gypsy35-I\_DR  
Gypsy-32-I\_DR  
Gypsy152-I\_DR\_2  
Gypsy50-I\_DR  
Gypsy49-I\_DR  
Gypsy155-I\_DR  
Gypsy122-I\_DR  
Gypsy120-I\_DR  
GYPSOL\_I  
Gypsy121-I\_DR  
Gypsy123-I\_DR  
Gypsy2-I\_SP  
Gypsy161-I\_DR  
Gypsy124-I\_DR  
Gypsy-31-I\_DR  
Gypsy91-I\_DR  
Gypsy42-I\_DR  
Gypsy17-I\_SP  
Gypsy119-I\_DR\_2  
Gypsy128-I\_DR

### **Athila**

GYPSO\_I  
Gypsy7-VV\_I\_1  
Gypsy19-VV\_I  
DIASPORA\_I  
Gypsy1-PTR\_I  
POPGY1\_I  
Gypsy-34\_SB-I  
ATHILA6B\_I  
Gypsy11-VV\_I  
Gypsy6-VV\_I\_2  
ATHILA4C\_I\_1  
Gypsy2-PP\_I\_2  
Gypsy18-PTR\_I\_2  
Gypsy12-VV\_I  
Gypsy20-VV\_I\_2  
Gypsy13-VV\_I\_2  
ATHILA6C\_I\_1  
Gypsy17-VV\_I\_2

### **Errantivirus**

ted\_I  
GYPSY40-I\_AG\_2  
Pifo\_I\_2  
GYPSY39-I\_AG\_2  
176\_I

zam\_I  
297\_I  
GYPSY5-I\_2  
Gypsy8-I\_Dya\_2  
idefix\_I  
GYPSY47-I\_AG\_2  
yoyo\_I  
GYPSY44-I\_AG\_2  
Gypsy7-I\_Dmoj  
GYPSY45-I\_AG\_1  
GYPSY7-I\_AG\_2  
tom\_I  
Gypsy2-I\_DM\_2  
GYPSY42-I\_AG\_2  
Gypsy20-I\_Dya  
burdock\_I  
HMS\_beagle\_I  
GYPSY41-I\_AG\_3  
GYPSY43-I\_AG\_1  
Chouto\_I\_2  
tv1\_I  
Gypsy1-I\_DM\_2  
Gypsy\_6B\_3  
Gypsy17-I\_Dpse\_1  
gypsyvir\_I  
springer\_I  
Gypsy10-I\_Dpse  
Gypsy17-I\_Dpse\_3  
Gypsy6-I\_Dpse  
Gypsy12-I\_Dpse\_1  
Gypsy16-I\_Dya  
Gypsy11-I\_Dya\_1

### **mag A-clade**

GYPSY22-I\_AG  
Gypsy56-I\_DR  
GYPSY19-I\_AG  
Gypsy153-I\_DR\_2  
GYPSY20-I\_AG  
GYPSY28-I\_AG  
Gypsy142-I\_DR  
DRM\_I  
Gypsy67-I\_DR  
GYPSY23-I\_AG  
GYPSY27-I\_AG  
Gypsy3\_MH-I  
GYPSY26-I\_AG  
CFG1\_I  
Gypsy10-NVi\_I  
GYPSY6-I\_CB  
Gypsy158-I\_DR  
GYPSY63-I\_AG  
Gypsy-14-I\_HM  
Gypsy-9-I\_HM  
GYPSY67-I\_AG  
hydra\_I

Gypsy92-I\_DR  
GYPSY64-I\_AG  
GYPSY55-I\_AG  
GYPSY3-I\_AG  
GYPSY21-I\_AG  
Gypsy-17-I\_HM  
GYPSY58-I\_AG\_2  
GYPSY25-I\_AG  
GYPSY24-I\_AG  
NONAUT-5  
GYPSY59-I\_AG  
Gypsy-28-I\_NVi  
Gypsy12-NVi\_I  
GYPSY60-I\_AG\_2  
Gypsy163-I\_DR\_1  
Gypsy13-NVi\_I\_2  
Gypsy2\_MH-I\_2  
NONAUT-3  
GYPSY5-I\_CB\_1

### **mag C-clade**

Gypsy5-I\_SP  
Gypsy86-I\_DR  
GYPS1\_I  
Gypsy143-I\_DR  
Gypsy-15-I\_HM  
Gypsy6-I\_SP  
Gypsy21-I\_SP  
Gypsy93-I\_DR  
Gypsy141-I\_DR\_2  
Gypsy58-I\_DR  
Gypsy1-I\_SP  
Gypsy53-I\_DR  
Gypsy-16-I\_HM  
Gypsy-7-I\_HM  
Gypsy11-I\_SP  
Gypsy55-I\_DR  
Gypsy19-I\_SP  
Gypsy3-I\_SP  
Gypsy14-I\_SP  
Gypsy12-I\_SP  
Gypsy68-I\_DR

### **mdg3**

Gypsy3-I\_AP  
Gypsy6-I\_AP  
GYPSY32-I\_AG  
GYPSY36-I\_AG  
GYPSY33-I\_AG  
GYPSY38-I\_AG  
GYPSY37-I\_AG  
GYPSY35-I\_AG  
Gypsy21-I\_Dpse  
GYPSY29-I\_AG  
GYPSY5-I\_AG

blastopia\_I  
GYPSY6-I\_AG  
mdg3\_I  
INVADER1-I\_AG  
Gypsy19-I\_Dpse  
Gypsy22-I\_Dpse\_1  
Gypsy18-I\_Dpse  
Gypsy12-I\_Dpse\_3  
Gypsy20-I\_Dpse  
Gypsy19-I\_Dya  
Gypsy22-I\_Dpse\_2  
Gypsy12-I\_Dya  
Gypsy15-I\_Dya  
GYPSY4-I\_AG  
Gypsy2-I\_Dya  
Gypsy2-I\_Dpse  
Gypsy1-I\_Dya\_1  
Gypsy14-I\_Dpse\_2

### **danio**

Gypsy98-I\_Dr\_2  
Gypsy157-I\_DR\_3  
Gypsy59-I\_DR  
Gypsy10-I\_DR  
Gypsy-21-I\_DR\_1  
Gypsy-17-I\_DR\_2  
Gypsy-15-I\_DR\_2  
Gypsy-16-I\_DR\_2  
Gypsy-19-I\_DR\_1  
Gypsy20-I\_SP\_2  
Gypsy6-I\_DR\_1  
Gypsy52-I\_DR  
Gypsy144-I\_DR\_2  
Gypsy82-I\_Dr\_2  
Gypsy13-I\_DR\_1  
Gypsy8-I\_DR\_1  
Gypsy100-I\_DR\_2  
Gypsy-18-I\_DR\_1  
Gypsy12-I\_DR\_2  
Gypsy10-I\_SP\_2  
Gypsy-14-I\_DR\_1  
Gypsy151-I\_DR  
Gypsy63-I\_DR  
Gypsy149-I\_DR  
GYPS2\_I  
Gypsy4-I\_DR\_2  
Gyp\_MD\_I  
Gypsy134-I\_DR\_2  
Gypsy78-I\_DR\_2  
Gypsy65-I\_DR\_2  
Gypsy156-I\_DR\_2  
Gypsy146-I\_DR\_2  
Gypsy84-I\_DR  
Gypsy66-I\_DR\_2  
Gypsy118-I\_DR\_2  
Gypsy106-I\_DR\_2



Gypsy85-I\_DR\_2  
Gypsy81-I\_Dr\_2  
Gypsy71-I\_DR\_2  
Gypsy137-I\_DR\_2  
Gypsy8-I\_SP\_2  
Gypsy136-I\_DR\_2  
Gypsy75-I\_DR\_2  
Gypsy80-I\_DR\_2  
Gypsy94-I\_DR\_2  
Gypsy147-I\_DR\_2  
Gypsy60-I\_DR\_2  
Gypsy132-I\_DR\_2  
Gypsy102-I\_DR\_2  
Gypsy140-I\_DR\_2  
Gypsy83-I\_DR\_2  
Gypsy74-I\_DR\_2  
Gypsy54-I\_DR\_2  
Gypsy117-I\_DR\_2  
Gypsy51-I\_DR\_2  
Gypsy133-I\_DR\_1  
Gypsy57-I\_DR\_1  
Gypsy116-I\_DR\_1  
Gypsy116-I\_DR\_2  
Gypsy133-I\_DR\_2  
Gypsy144-I\_DR\_3  
Gypsy57-I\_DR\_2  
Gypsy94-I\_DR\_3

**tat**

Gypsy-14\_SB-I\_3  
ATLANTYS1\_I\_1  
Gypsy3-VV\_I\_2  
Ogre-PT3\_I\_2  
Gypsy-18\_SB-I\_2  
Gret1\_I  
Ogre-VP1\_I\_2  
GYPSI\_I\_2  
Ogre-PT2\_I\_2  
Gypsy-30\_SB-I\_2  
Gypsy-71-I\_ZM  
Gypsy-10\_SB-I  
GYPSIA\_I\_3  
ATLANTYS\_LC\_I\_3  
Gypsy3-SB\_I\_2  
Ogre-LE1\_I\_2  
GmOgre\_I\_2  
Ogre-MT3\_I\_2  
Gyp\_I\_MT\_2  
retrosor1\_I  
Ogre-MT4\_I\_2  
GYPSY3-I\_MT\_2  
Gypsy27-ZM\_I  
Gypsy12-ZM\_I\_3  
Ogre-SD1\_I\_2  
Gypsy-22\_SB-I  
Ogre-PT1\_I\_2

RETRO2\_I  
RETRO2A\_I\_2  
Gypsy2-SB\_I  
Gypsy29-ZM\_I\_2  
Gypsy-3-I\_TA  
Gypsy11-ZM\_I  
CALYPHAN2\_I\_MT\_2  
CINFUL2A\_I  
cinful1\_I  
Gypsy-74-I\_ZM  
Atlantys-2-I\_OS\_2  
Gypsy16-VV\_I\_2  
HUCK1-I\_ZM\_2  
Gypsy-92\_SB-I\_2  
Gypsy-2-I\_TA\_2  
Gypsy-2-I\_TA\_1

### **ulysses**

Gypsy4-I\_Dpse  
Gypsy16-I\_Dpse\_1  
GYPSY12\_I\_1  
Gypsy10-I\_Dya  
Gypsy3-I\_Dpse  
Gypsy7-I\_Dpse\_2  
Gypsy5-I\_Dpse\_2  
Gypsy15-I\_Dpse\_2  
Gypsy13-I\_Dpse\_2  
Gypsy24-I\_Dpse  
Gypsy5-I\_Dya\_2  
Gypsy23-I\_Dpse\_1  
ulysses\_I  
Gypsy18-I\_Dya  
Gypsy13-I\_Dya\_3  
Gypsy23-I\_Dpse\_2  
Gypsy6-I\_Dya\_3

### **osvaldo**

Gypsy11-I\_Dpse\_2  
Gypsy6-I\_Dmoj\_2  
Gypsy8-I\_Dpse\_2  
osvaldo\_I  
Gypsy-38\_NVi-I\_2  
Gypsy-17-I\_NVi\_2  
Gypsy15-NVi\_I\_2  
Gypsy-16-I\_NVi\_2  
Gypsy1-I\_Dmoj\_1  
Gypsy4-I\_Dmoj  
Gypsy-23-I\_NVi\_2  
Gypsy-19-I\_NVi\_2  
Gypsy-27-I\_NVi\_2  
Gypsy-21-I\_NVi\_3  
Gypsy4-I\_Dya\_3  
Gypsy4-I\_Dya\_2  
Gypsy9-I\_Dpse

## **Chromovirus**

REM1\_I  
GYMAG1\_I\_2  
GYMAG2\_I\_3  
Gypsy-29\_SB-I  
Gypsy-25\_SB-I\_2  
GYPSOR1\_I\_2  
Gypsy3-I\_VC  
Gypsy-6\_SB-I  
Gypsy-19\_SB-I  
Gypsy30-ZM\_I  
RETROSAT2\_I  
Gypsy-66\_SB-I\_2  
Gypsy-77-I\_ZM\_2  
Gypsy-4-I\_TA  
Gypsy63-ZM\_I\_2  
Gypsy65-ZM\_I  
SUKKULA4\_HV\_I  
RETROSAT3\_I  
RAM9B\_I  
Gypsy32-ZM\_I  
Gypsy-12\_SB-I  
TCG3\_I\_2  
RETROSAT5\_I\_2  
RIRE3\_I\_2  
RAM12\_I\_2  
RETROSAT4\_I  
Gypsy-78-I\_ZM\_2  
Gypsy14-PTR\_I\_2  
Gypsy67-ZM\_I\_2  
tse3\_I  
Gypsy-70-I\_ZM\_2  
ROMANI1\_I  
Gypsy6-PTR\_I  
Gypsy47-ZM\_I  
Gypsy26-ZM\_I  
Gypsy6-I\_VC  
Gypsy5-PTR\_I  
Gypsy1-SB\_I\_2  
SZ-56A\_I  
Gypsy-104\_SB-I  
Gypsy-82\_SB-I  
Gypsy6-ZM\_I  
Gypsy14-ZM\_I  
Gypsy-16\_SB-I  
Gypsy2-PTR\_I  
Gypsy19-I\_CR  
Gypsy-78\_SB-I  
Gypsy-42\_SB-I  
Gypsy-56\_SB-I  
Gypsy10-I\_VC  
GYPSY1GM\_I  
Gypsy-28-I\_DR  
Gypsy-114\_SB-I  
Gypsy15-ZM\_I  
DEA1

Gypsy64-I\_DR\_2  
Gypsy15-I\_CR\_2  
Gypsy105-I\_Dr\_2  
Gypsy103-I\_Dr  
Gypsy-36\_SB-I  
SZ-59\_I  
SZ-10\_I  
RETROSAT6\_I\_2  
GYPSHAN3\_I\_MT  
Gypsy2-VV\_I  
Gypsy-55\_SB-I  
Gypsy-113\_SB-I\_2  
GmGYPSY10\_I  
Gypsy-17\_SB-I  
Gypsy-77\_SB-I  
Gypsy-70\_SB-I  
Gypsy21-ZM\_I  
Gypsy19-PTR\_I\_2  
Gypsy104-I\_Dr\_2  
Gypsy-7\_SB-I  
Gypsy-33\_SB-I  
CRM\_INT  
CRM\_I  
Gypsy7-I\_VC\_1  
Gypsy55-ZM\_I  
Gypsy-39\_SB-I  
Gypsy-24\_SB-I  
Gypsy16-ZM\_I  
Gypsy-57\_SB-I  
Gypsy-47\_SB-I  
CRM-I\_OS  
Gypsy20-PTR\_I  
Gypsy16-PTR\_I  
Gypsy-13\_SB-I\_1  
Gypsy41-ZM\_I  
Gypsy-41\_SB-I  
Gypsy5-ZM\_I  
Gypsy-62\_SB-I  
Gypsy-37\_SB-I  
Gypsy24-ZM\_I  
Gypsy-60\_SB-I  
Gypsy8-ZM\_I\_1  
Gypsy-75\_SB-I\_1  
Gypsy-69\_SB-I  
Gypsy62-ZM\_I  
Gypsy24-PTR\_I  
Gypsy-65\_SB-I  
ATGP3B\_I  
Gypsy-72\_SB-I  
GYLES1\_I  
SHAGY\_I\_MT\_1  
RIRE8C\_I  
Gypsy-64\_SB-I  
Gypsy-28\_SB-I  
SZ-54B\_I  
Gypsy8-PTR\_I

Gypsy-35\_SB-I  
GYPSODE1\_I  
Gypsy96-I\_DR\_2  
Gypsy-32\_SB-I\_1  
Gypsy-21\_SB-I\_2  
Gypsy-165-I\_DR\_2  
Gypsy-46\_SB-I  
Gypsy15-PTR\_I  
Gypsy-48\_SB-I  
Gypsy7-PTR\_I  
Gypsy23-PTR\_I  
Gypsy62-I\_DR  
Gypsy-76\_SB-I  
Gypsy61-ZM\_I  
Gypsy-40\_SB-I  
Gypsy-170-I\_DR\_2  
Gypsy50-ZM\_I  
Gypsy16-I\_VC  
Gypsy-1-I\_CR\_2  
sushi\_I  
Gypsy1-I\_GA  
Gypsy-51\_SB-I  
Gypsy-106\_SB-I\_1  
ATGP4\_I  
SZ-54D\_I  
GYZMA1\_I  
Gypsy-8\_SB-I  
Gypsy-71\_SB-I  
CRMA1\_I\_2  
Gypsy8-VV\_I  
Gypsy60-ZM\_I  
Gypsy-15\_SB-I  
Gypsy17-PTR\_I  
Gypsy107-I\_Dr\_2  
Gypsy-23\_SB-I  
Gypsy3-PTR\_I  
Gypsy4-I\_AO  
Gypsy3-ZM\_I  
Gypsy-31\_SB-I  
Gypsy-117\_SB-I  
Gypsy10-PTR\_I  
Gypsy-59\_SB-I  
Gypsy-115-I\_DR\_2  
Gypsy101-I\_DR  
Gypsy-84\_SB-I  
ATGP5A\_I\_2  
Gypsy159-I\_DR  
Gypsy-44\_SB-I  
Gypsy8-I\_VC\_1  
Gypsy70-I\_DR\_2  
Gypsy1\_ZM\_I\_2  
Gypsy14-I\_VC  
Gypsy-50\_SB-I  
Gypsy5-I\_VC  
Gypsy1-I\_ST  
Gypsy88-I\_DR\_2

Gypsy-9\_SB-I  
GYPSHAN4\_I\_MT  
GYPOT1\_I  
GYCUME1\_I  
Gypsy19-ZM\_I  
ATGP3A\_I\_2  
Gypsy97-I\_DR\_2  
Gypsy76-I\_DR\_2  
Gypsy-97\_SB-I  
SZ-54A\_I  
Gypsy23-ZM\_I\_2  
Gypsy-38\_SB-I\_1  
SZ-54C\_I  
Gypsy11-PTR\_I  
GYPSY5I\_DR  
Gypsy7-ZM\_I  
Gypsy69-I\_DR  
Gypsy37-ZM\_I  
Gypsy-94\_SB-I  
Gypsy-99\_SB-I  
Gypsy-53\_SB-I  
Gypsy89-I\_DR  
Gypsy-166-I\_DR\_2  
Gypsy-102\_SB-I  
GYZMA2\_I  
Gypsy22-VV\_I\_1  
Gypsy-105\_SB-I\_2  
Gypsy2-I\_ST  
Gypsy-68\_SB-I  
Gypsy-168-I\_DR\_2  
Gypsy135-I\_DR\_2  
Gypsy-85\_SB-I  
Cgret\_I  
Gypsy-111\_SB-I  
Gypsy-110\_SB-I\_2  
Gypsy-58\_SB-I\_2  
Gypsy-54\_SB-I  
IBGYPSY1\_I\_1  
Gypsy138-I\_DR  
Gypsy-26\_SB-I  
Gypsy22-PTR\_I  
Gypsy-79\_SB-I  
Gypsy-81\_SB-I  
Maggy\_I  
Gypsy108-I\_Dr\_2  
Gypsy-93\_SB-I\_1  
Skippy\_I  
Gypsy-49\_SB-I\_2  
Gypsy-103\_SB-I  
GYARLI1\_I\_2  
Gypsy72-I\_DR  
Gypsy-20\_SB-I  
MarY1\_I  
Gypsy-118\_SB-I\_2  
Gypsy145-I\_DR  
Gypsy-52\_SB-I\_1

Gypsy15-I\_VC  
Gypsy-63\_SB-I  
Gypsy15-VV\_I  
AFLAV\_I\_2  
Gypsy164-I\_DR  
Gypsy-67\_SB-I\_1  
Gypsy20\_ZM\_I\_1  
Gypsy5-VV\_I  
Gypsy2-I\_AO\_2  
Gypsy33-ZM\_I\_1  
MGLR3\_I  
Gypsy40-ZM\_I\_2  
CfT1\_I  
Gypsy-11\_SB-I\_1  
grasshopper\_I  
Gypsy4-ZM\_I\_1  
Gypsy11-I\_VC\_2  
Gypsy56-ZM\_I\_2  
REALAA\_I  
Real\_I  
Gypsy-74\_SB-I\_1  
Gypsy4-I\_VC\_2  
Gypsy18-VV\_I  
Gypsy-1-I\_ACa\_2  
Gypsy-27\_SB-I  
Gypsy39-ZM\_I\_2  
Gypsy57-ZM\_I  
Gypsy17-I\_CR\_2  
Gypsy25-ZM\_I\_2  
Gypsy-109\_SB-I  
Gypsy2-ZM\_I\_1  
Gypsy4-PTR\_I\_1  
Gypsy-61\_SB-I\_1  
Gypsy-107\_SB-I  
SZ-64B\_I\_2  
Gypsy-87\_SB-I\_2  
Gypsy3-PP\_I  
Gypsy9-PTR\_I\_1  
Gypsy18-ZM\_I\_2  
Gypsy-43\_SB-I\_1  
CAREP1  
Gypsy1-VV\_I\_1  
RN12\_I  
Gypsy-96\_SB-I\_2  
Gypsy-98\_SB-I  
Gypsy-86\_SB-I\_2  
Gypsy14-I\_CR  
Gypsy-91\_SB-I\_2  
Gypsy-101\_SB-I\_2  
Gypsy18-I\_CR\_2  
Gypsy-45\_SB-I  
Gypsy-89\_SB-I\_1  
Gypsy-88\_SB-I\_1  
Gypsy43-ZM\_I  
Gypsy-112\_SB-I  
Gypsy-83\_SB-I\_1

Gypsy-119\_SB-I\_2  
Gypsy-100\_SB-I  
Gypsy-83\_SB-I\_2  
Gypsy12-PTR\_I  
Gypsy10-ZM\_I\_3  
Gypsy-101\_SB-I\_1  
Gypsy28-ZM\_I  
GYPSHAN2\_I\_MT\_1  
Gypsy9-ZM\_I\_2  
Gypsy17-ZM\_I\_1  
Gypsy-86\_SB-I\_1  
Gypsy-43\_SB-I\_2  
Gypsy-87\_SB-I\_1  
Gypsy-91\_SB-I\_1  
Gypsy10-VV\_I  
Gypsy51-ZM\_I\_1  
SZ-64B\_I\_1  
Gypsy2-ZM\_I\_2  
Gypsy-90\_SB-I  
Gypsy58-ZM\_I\_2  
Gypsy51-ZM\_I\_2  
Gypsy-116\_SB-I\_3  
Gypsy9-ZM\_I\_1  
Gypsy13-ZM\_I\_2  
Gypsy4-I\_VC\_1  
Gypsy-89\_SB-I\_2  
Gypsy-80\_SB-I\_2  
Gypsy1-VV\_I\_2

## **Nvi**

Gypsy7-NVi\_I\_1  
Gypsy14-NVi\_I  
Gypsy-24-I\_NVi\_1  
Gypsy-20-I\_NVi\_2  
Gypsy-34\_NVi-I\_2  
Gypsy-31-I\_NVi\_1  
Gypsy-30-I\_NVi\_3  
Gypsy-37\_NVi-I\_2  
Gypsy-18-I\_NVi  
Gypsy-36\_NVi-I\_2  
Gypsy-26-I\_NVi\_1
