# Supplementary material for: Conserved structure and inferred evolutionary history of long terminal repeats (LTRs)
Source: PubMed Central journal article supplement (PMC3601003; doi:10.1186/1759-8753-4-5), 2013-02-01
Supplement: 1759-8753-4-5-S2.pdf [file 1759-8753-4-5-S2.pdf]

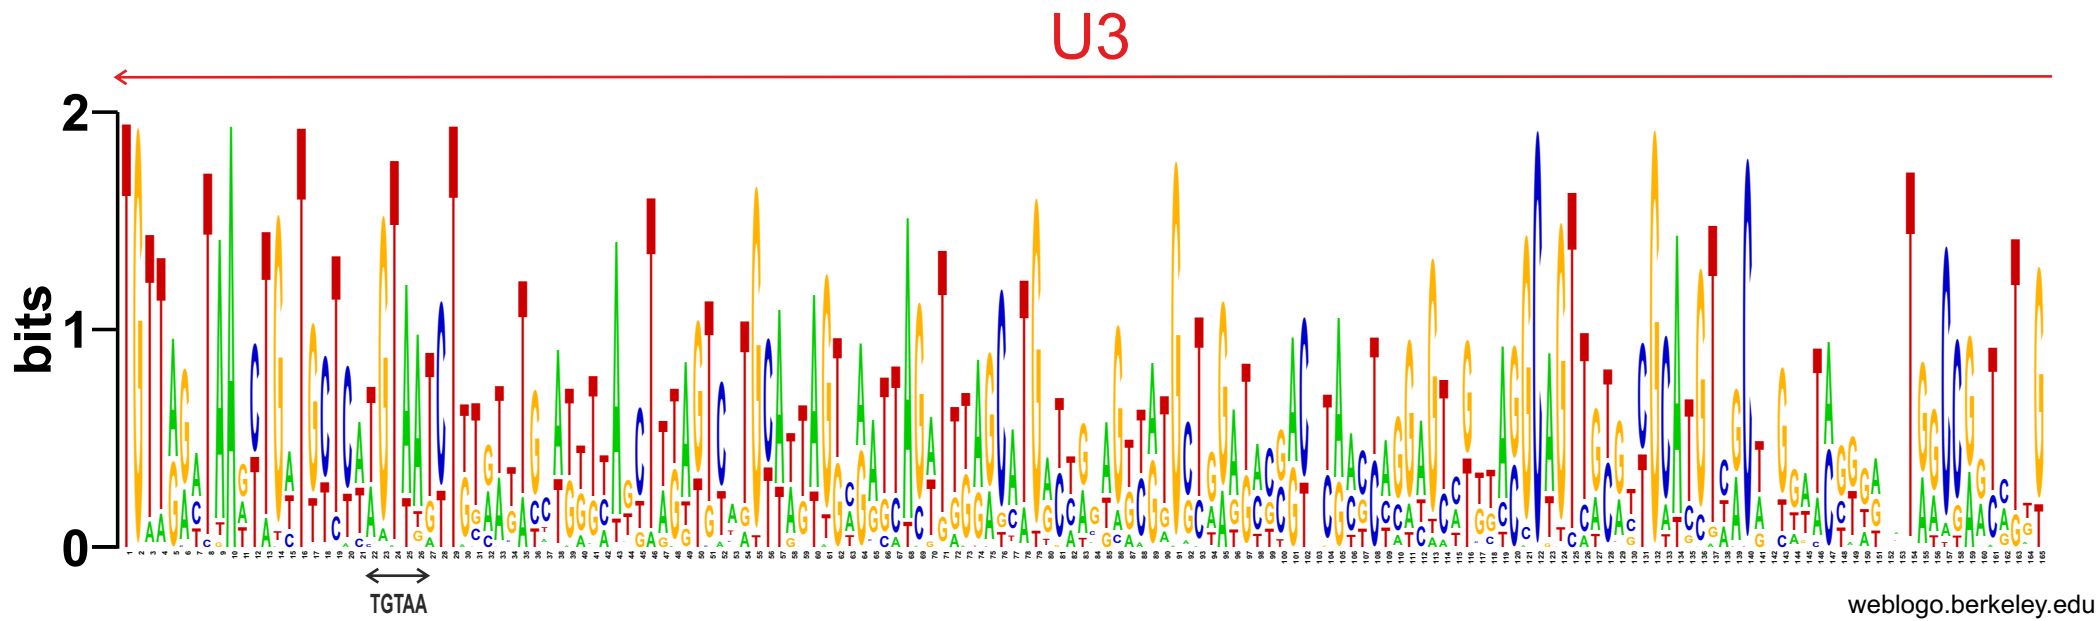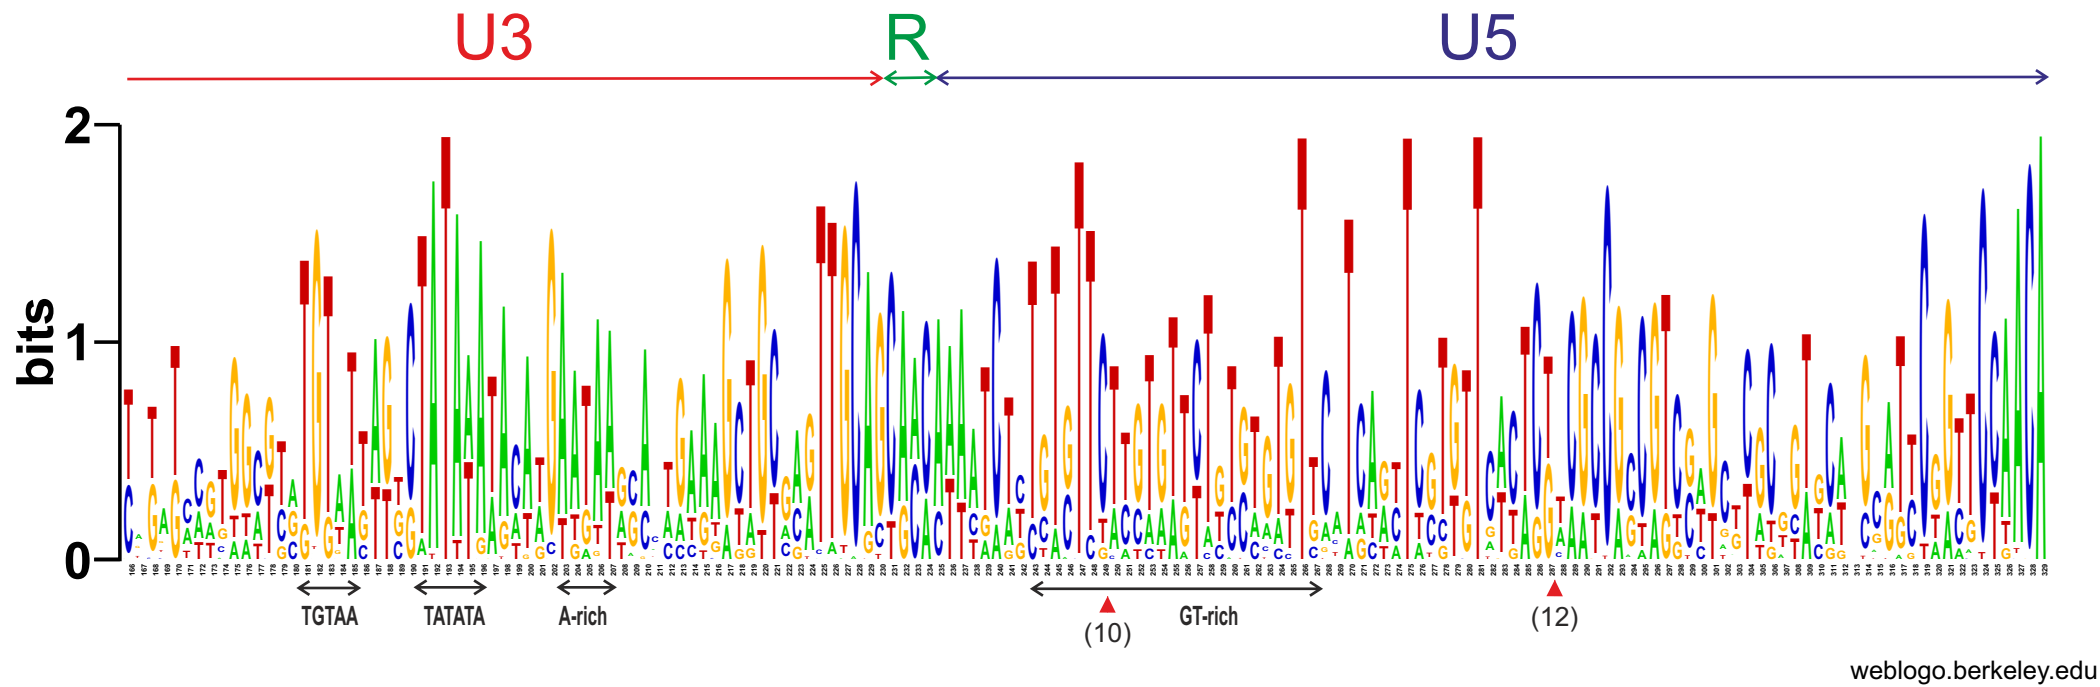

Suppl fig 1, long Sire HMM

# U3

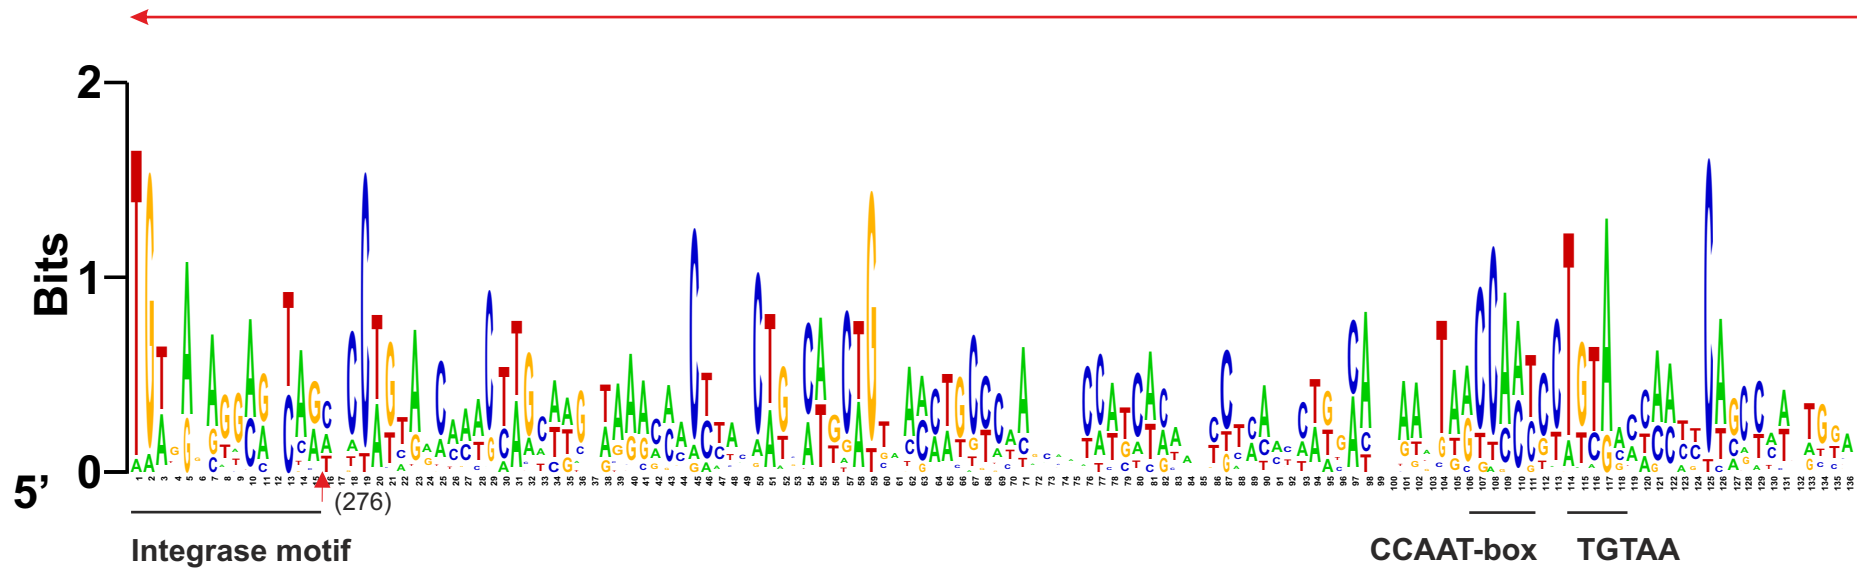

# U3

# R

# U5

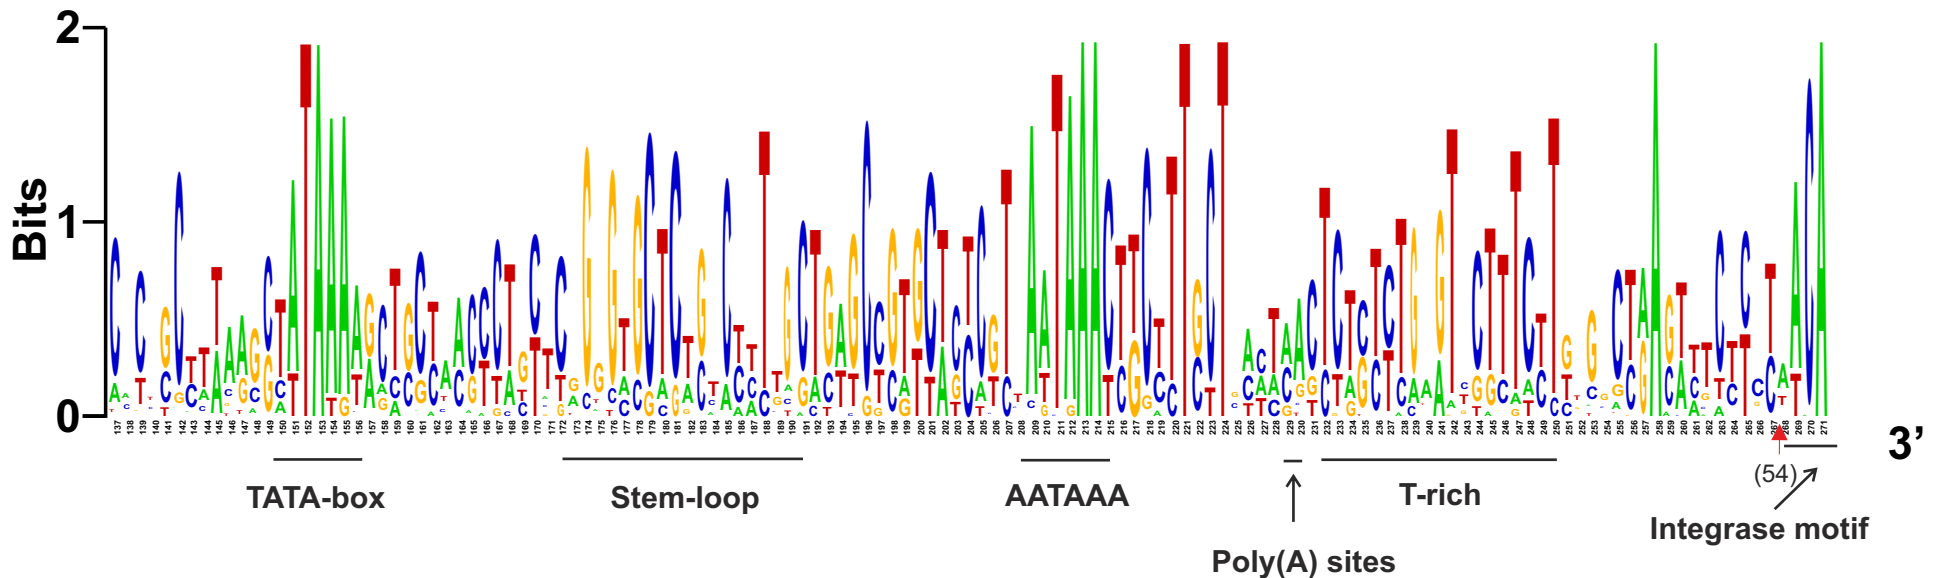

weblogo.berkeley.edu

Suppl fig 2, long Gamma HMM

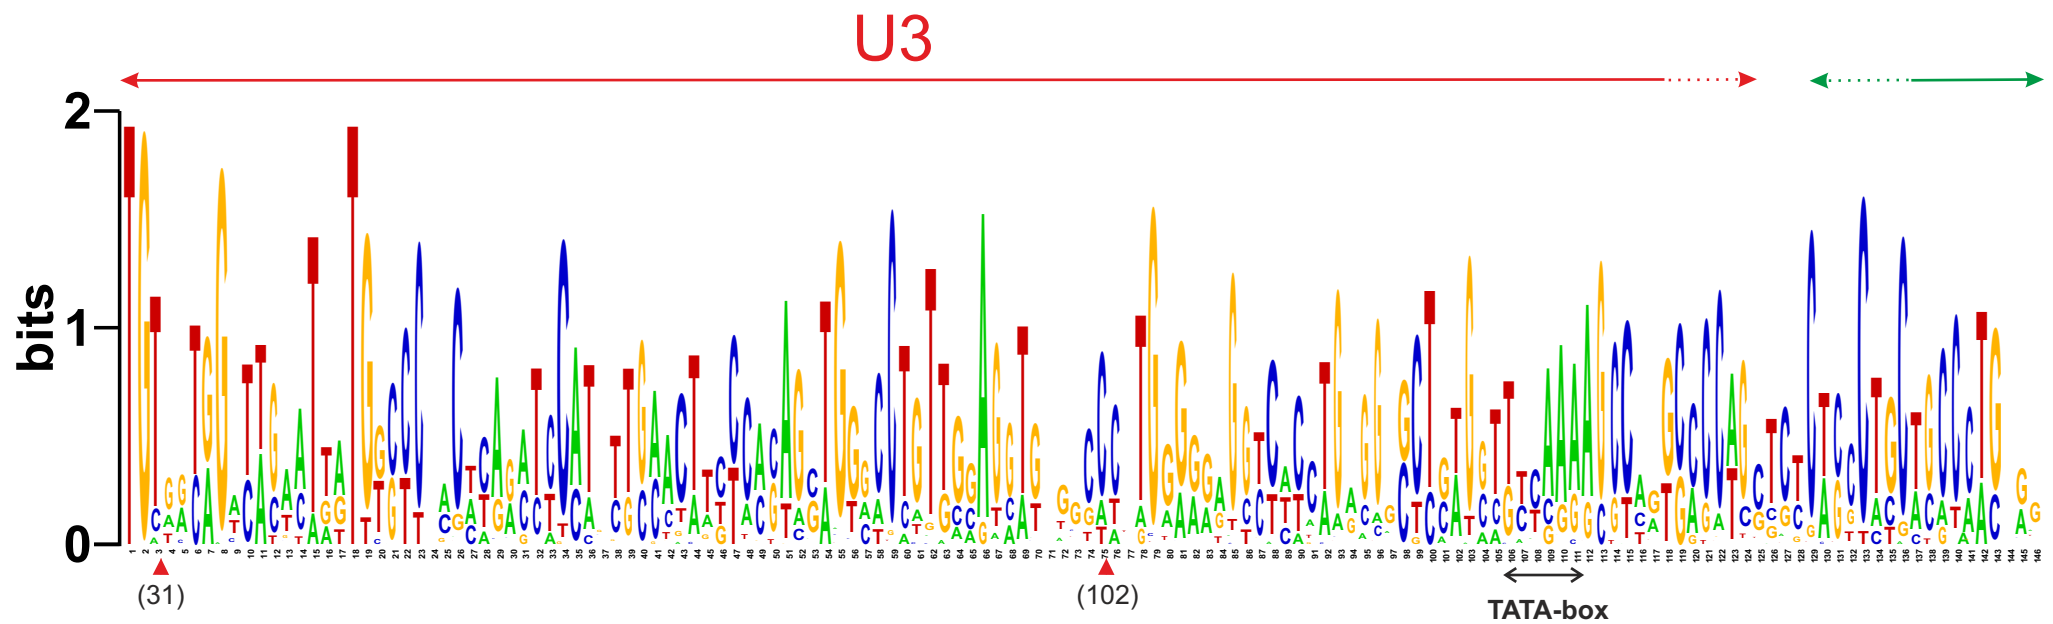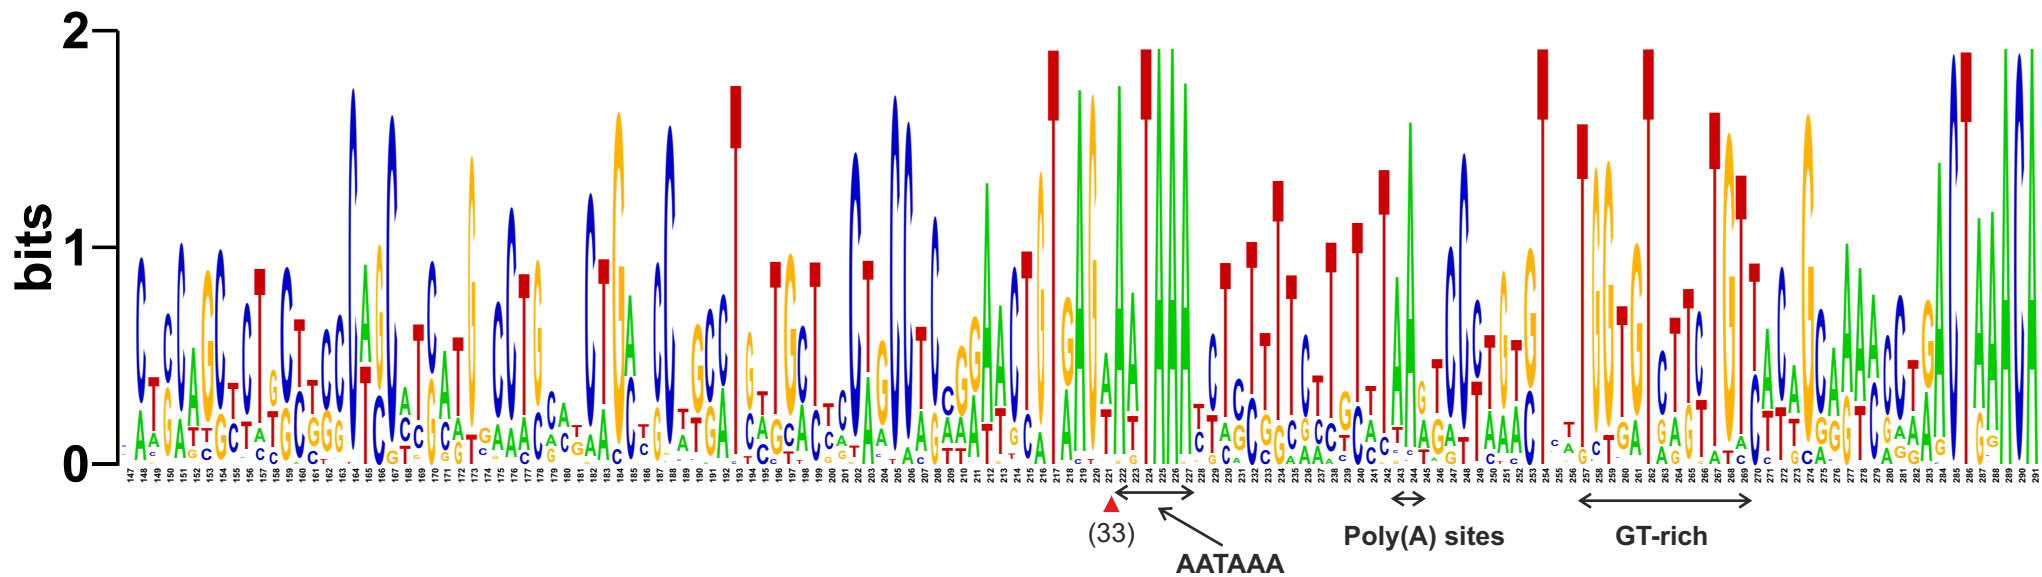

# Supplemental fig 4

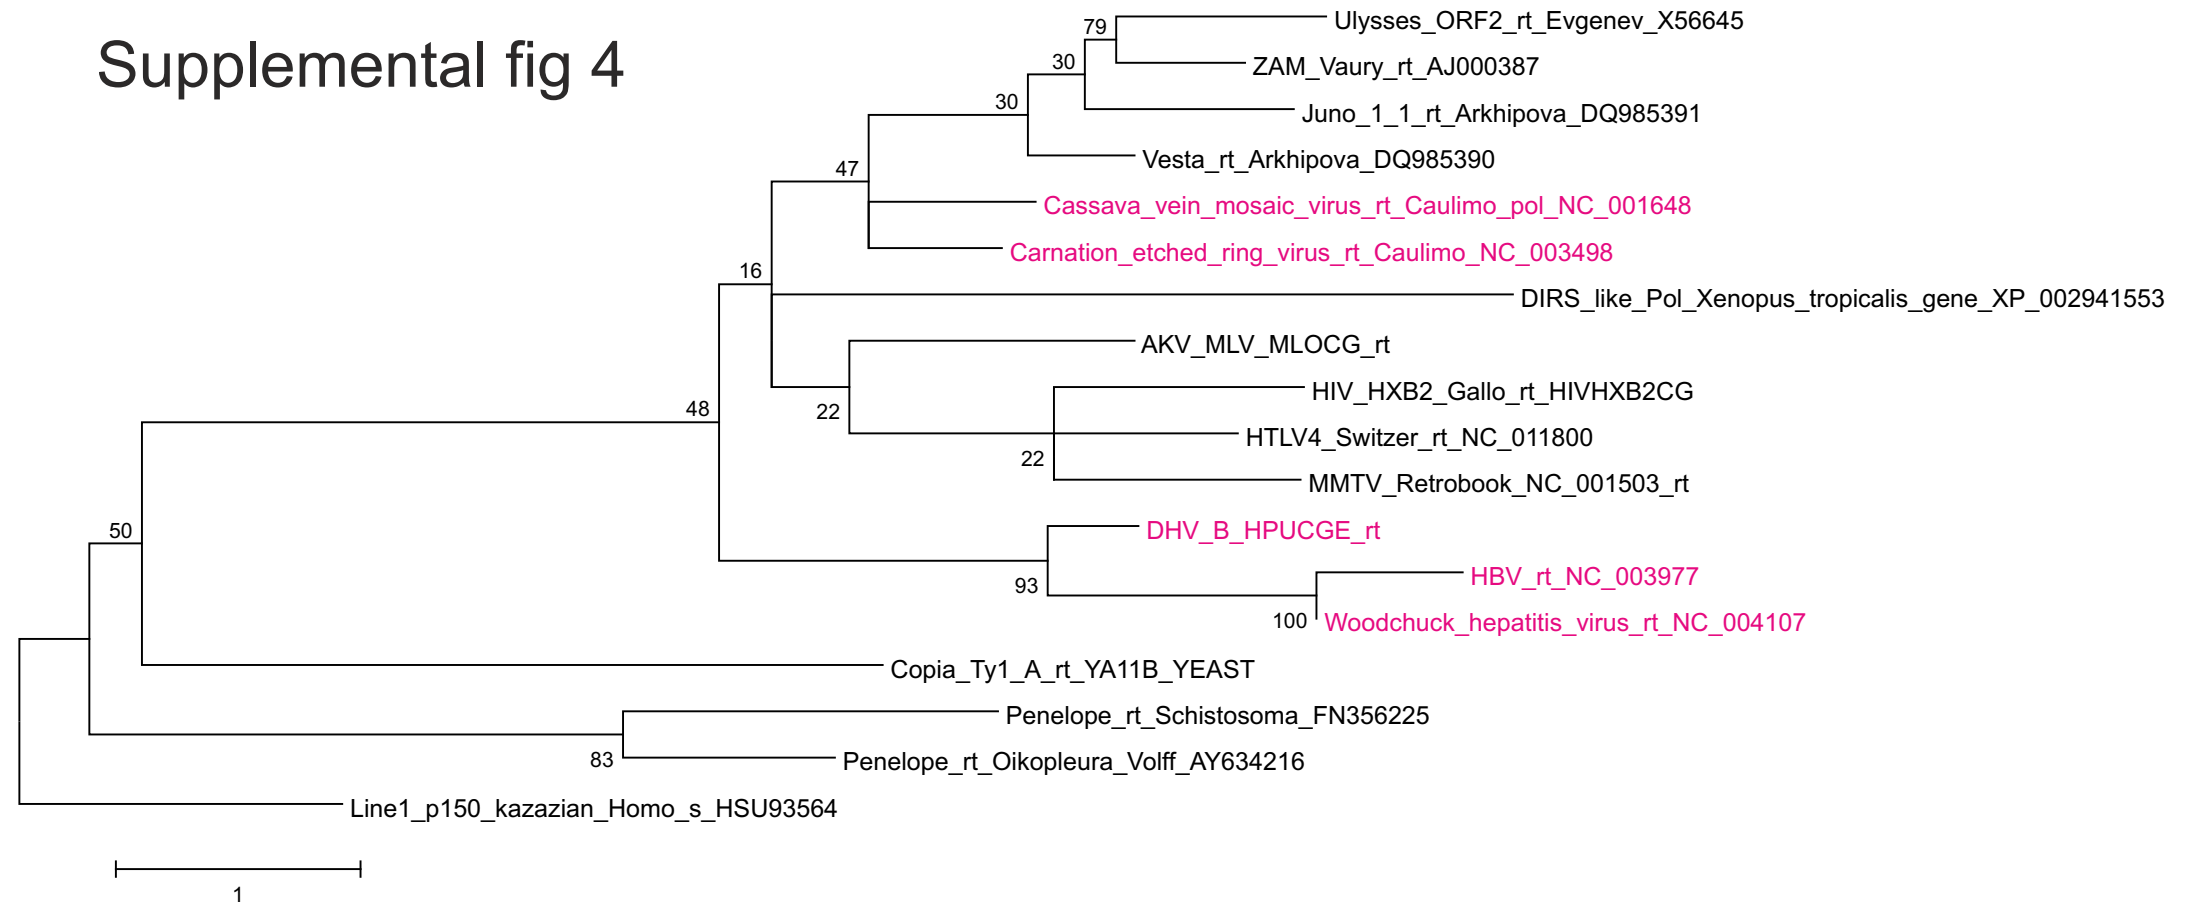



-----  
-----  
-----  
-----  
-----AG-TAAA-G-CcA-T-G-TC--GA-----  
--A-Actgt----CT---AcgaTTc--CT-CG-A-GTG--T--TTT--TCc-----  
-----Ag-C---TACCcgccactcgcccaccgactcccctcggacctcagtttg  
ggctagaacctg-----  
-----  
-----  
-----  
-----ACA-

>MLT1A0

TGCtatggactgaatgtttgtgtccccccaaaattcatatggtgaagccctaataccccaa  
tgtgatggtattaggaggtggggcctttgggaggtgattaggattagatgaggtcatgag  
ggcggggccctcataatgggattagtgcccttataaa-----  
-----  
-----  
-----  
-----

-----AG--A-G-A-----CCY-CA--Ga--  
----G-----AG-CT-----CC-CT--TG-----Ccccttccgcatgtgagg  
acacagtgagaaggcgcctctacgaacc-----  
-----  
-----

-----AG-G--GAA-T---G-A--G-----  
C-C-----C-T-C--AC-----C--AGaaac-TGA-A---TC-TG-----  
-----C---CGg--Cg--CC--T-----TG-AT-Cttggactt-----C--CC

AG---CC----T-CC---AGA-AC--Tg--T----GAG-----A-----

-----

-----

-----

-----

-----

-----

-----AA-TAAA-T-TtC-T-G-TT--GT-T----

T-A-Agctac---CC---A---GT---CT--ATG-GTAt-T--TTG--TTata--Gcagc

ccg--A-----A--C---AGAC-----

-----

-----

-----

-----

-----TAAgACA-

>LTR16A

TGTgacggacatgraggtgctgcccagatcccccttcaagaacggaartyttatncc

cyagctgctgggagwgctgtcggcagacagccctcagctgtcagccccttcaggaattgc

ctcngctgaagagagccgcctcgcccaaggtcacgccccctccccggggcagcccacatc

caatgactgrtcaatrtggaggtataaaggcccgccctctcgcccccaactcgggacaac

tctgaagggccatyccagctccagagctccccgtggggtc-----

-----

-----

-----

-----GG--C-T----G-----AG--GC-CTT-TGttG---

----C-----GA-CT-G----C-AT--TG-----C-----

-----

-----

-----

-----AG-C--CCA-A---C-T--T-----  
C-T-C--C-----C-T-C--TG-----C-----CC-Aat--CC-TG-----  
-----C--TT-----CC--T-----TC-CC-Tt-----C--CC  
TT---CC---A-CA---GGC-GT--Tga-Tccc-AAGggcgctccc-----T-----

-----AA-TAAA-C-C-T-C-C-TG--CA-C--GC  
T-A-Atct-----CC---A---T---CT-CAG-a--G--T--CTG--CTtccc-Gggg-  
----A-----Ac-Cc--AACC-----

-----TGCaACA-

>ORR1B

TGTggtggtttgaatraaaatggccccataggctyataggagtggcactattaggagg  
tgtggccttggttgaggaagtgtgtcactgggggtggcctttgaggtytcakatgctcaag  
ccaggcccagtggttctctcttctgctgcctgcagatcaagatgt-----

-----AG--A--A-----C-TCT-CA--G---  
---C-----TA-CT-T---CT-CC--AG-----C-----



-----  
-----  
-----  
-----A--C--CAT-Gt--C-T--G-----  
C-C-T--G-----C-A---TG-----C-----TGC-----CA-TG-----  
-----C---TT---C---CCg-Cca---TG-AT-Gataa-----TggAC  
TAaa-CC----T-CT---GAA-AC--Tg--T---AAGccagcccc-----A-----  
-----  
-----  
-----  
-----  
-----

-----AT-TAAA-T-G-T-T-T-TC--CT-T--TA  
T-A-Agagttg--CC---T---TG---GT-CATG-GTG--T--CTC--TTcaca-Gcaat  
aga--A-----Ac-Cc--TAAC-----  
-----  
-----  
-----  
-----

-----TAAgACA-

>LTR53

TGTggtgtaaggcctaaaattaaggcccaatattatgtgctgccttgacatctggtgaaa  
tcaggagggcctcaaatggcctaactacaagttcccctcccactctgctcccatggata  
aggtcccctagccaaacaaccctccttatcaaggggaccaggcacagttcctgcttatcc  
ctgntgagtagygggtttcagttccctgcccagcccgtggaattattcaaayaagccaatc  
acatcctcctgcggaaccaggggtcacctcaccctcttgataactaaa-----  
-----  
-----



-----  
-----  
-----  
-----  
-----  
-----AC--T-C-T--C-----TT--GC-CCT-TC-----  
-----C-----GC-CT-T--CCgCC--A-----  
-----  
-----

-----TG-G--GAT-GacgC-A--G-----  
C-A-A--G-----A-A-G--Gcc-----C--TC-----ACC-A---GA-TG-----  
-----C---CGg--Cn--CC--W-----TG-AT-Cttggactt-----C--CC  
AG---CC---T-CC---AGA-AC--Cg--T---GAGcc-----A-----  
-----  
-----  
-----  
-----  
-----  
-----

-----AA-TAAA-T-TtC-T-G-TT--CT-T--TA  
T-A-Aattac---CC---A---GT---CT--GTG-GTAt-T--CTG--TTata--Gcagc  
aca--A-----Aa-C---GGAC-----  
-----  
-----  
-----

-----TAAgACA-

>MLT1M

TGTactagacatgtcaatcacgggtgctgccacgcccacagccccttctaagggaaactg



-----TAAaACA-

>MLT1E1A

TGGgcagaattctaagatggccccaagattcccacctcctggtrttcatgccttgata  
atccccctccccttgagtgtgggtaggacctgtgaatatgatggatatcactccttgact  
atggtatagtatatggcatgaagggattttgcagatgtaattaattttgcagatgtaata  
ggtccctaatacagttgactttgagttaatcaaaagggagattatcctgggtgggcctgac  
ctaatacaggtgagcccttaaaaaagnctctaaatccgtctngaaagagaagaacta---

-----AG--A-G-A--G-----AT--TC-TCC-T-----  
-----G-CT-G---GC-CT--TG-----Aagaagtaagctgccatgt  
tgtgangagggctctgtgaagagggccacgtggcaaggacctgaggggtggcctctaggagc  
tgagagcaatccctggccagccaacagccagcaagaaaataggacctcagtcmtacagc  
tgcaaggaamtgaattctgccaacaacctgaatgagcttggaagaggattctaagcctca  
gatgagaacacagccctagccaacaccttgatttcAG-C--CTT-G-----T--Ga----  
G-A-C--C-----C-T-G--AG-----C--AG-----AGG-Ac---CC-AG-----  
-----C---TA---A---GC--Tg----TG-CC-Cagac-----T--CC  
TGac-CC----A-CA---GAA-AC--Tg--T----GAGa-----T-----

-----AA-TAAA-T-GtG-T-G-TT--GT-T--T-  
T-A-Agcca---CT---Aa--GT---TT--GTG-GTAa-T--TTG--TTat---Gcagc  
-----A-----At-Aga-AAAC-----



C-A-Ag-----CC---Ttt-GT---CT-CAGG-----c-T--CTG--CTttc--Ggggg

-----A-----Ac-Cc--AGGC-----

-----

-----

-----

-----

-----TAAgACA-

>THE1A

TGAataggtttggctgtgtccccacccaaatctcaacttgaattgtatctcccagaattc

ccacgtgttggtgggagggaccagggggaggtaattgaatcatgggggcccggctttccc

gtgctattctcgtgatagtgaaataagtctcacgagatctgatgggtttatcaggggtttc

cgctttt-----

-----

-----

-----

-----

-----G--C-T-T--C-----TT--CC-TCA-TT--T---

-----TC-CT-----CT--TG-----C-----

-----

-----

-----

-----CG----CCG-C---CaT--G-----

T-A-A--G-----A-A-G--TG-----C--CT-----TTC-G---CC-TC-----

-----C---CG---C---CA--Tga--TT-CT-Gaggcctc-----C--CC

AG---CCa---T-GT---GGA-AC--Tg--T---AAGtcc-----A-----

-----

-----

-----

-----

-----  
-----  
-----AT-TAAA-C---C-T-C-TT--TT-T--CT  
Tc-----CC---A---GT---CT-CG-G-GTA--T--GTC--TTtatcaGcagc  
gtga-A-----Aa-C---GGAC-----

-----TAAAtACA-

>GGLTR3F1\_LTR

TGTcatggTTTTgtaacttcgctattgggtattccacatcataacatcatggacaaaagag  
aagaactacgtatcccagaggacctcacggtcagagaaggaagacacatcacgga-----

-----AG--A-T-A-----CG-TCA-T-----  
---C-----TG-GT-T---GC-GC---G-----Cggtgcttcttcactt---

-----TC-G--CTT-G--C-T--G-----  
C-C-G--G-----G-A-G--AG-----G--AG-----TGGgT---G--TG-----  
-----C---TT---T---CC--A-----AG-CC-Ggg-----Cg-CC  
TT---CA---T-CA---AG-----T---AAGgc-----Tttcggtt  
tcggaaactctctcactctctctctctccctctctatcgctctttcgctctctctccc



tcattccatttggtttattataacttactcccaattagattgtattgtatcgtgtcatctt  
gcatcccaacatcatagtttagtaa-----

-----  
-----  
-----

-----AA-TAAG-----T-T-C-TC--CT-T--CT  
T-AgAttgttg--CC---Acc-GC---TT-C---GTT--T--TTC--TCg----Gg---  
-----A-----A--G---TGA-agggggaggggggcccgcaagcctaccggccccctgtc  
acgggcacagatctatctaggttaactccgtg-----

-----  
-----  
-----

-----ACA-

>MLT2F

TGTggtggctttgtaatgtgtcaacttggctaggctggaactacatttcccagaattccc  
ttccctgtrkttccaggttagggggccacaagagacattctgtgtgagatttggaa  
ggcgggaagtgaagcagcagccattttgttttctgtgctcggagaggtcagagtcagcagg  
cgctgttgcagctcacacagttgtcgtkactctgctggctcacctcgttggcgtggggc  
agc-----

-----  
-----  
-----

-----AG--C-C-----G--GG-CCC-----G---  
----C-----AG-CT-G---CT-CC--AS-----Cttcccctggatcctcctt  
cagcttctccgactcctgggcccaggtgtgtgktagctccgtgacgaagggcgccagctt  
ctcctgcaggacacccacatcatcgaggtcggaggcagtgagagactgacatgggttcca  
gtttgtcctcgtgggttccagctcatgcttg-----

-----TG-G--GTT-C---C-A--G-----  
C-T-T--Gt----C-C-T--TG-----C--TC-----TCC-C---CC-ACtttat

atccatC---TT---C---CC--T-----TC-CT-Gac-----Tg-CC  
TGc--CC---T-GT---GGA--C--Tt--C---AAGc-----Tccagcat  
cagacgcaragacaacagccttacagagactgcttaaccagctcccacaattgcgtaagg  
tcaaatccctat-----

-----AA-TAAA-T---C-T-C-TT--AT-Ta-TA  
T-A-Tatctc---CT---A---GTg--GT-TCTG-CTTc-T--CTGa-TT-----Ga---  
----A-----C--Cc--TGAC-----

-----TGAtACA-

>MT2C

TGTagtggtattcctggtgtcaacttgactatatttggaatgaactacaatccagaat  
tggaaggctcaccagtgaccctaactgagggtgggagatacaagtttctgacctggat  
cttggtatggagatcttgaggcatagtggtatggattccagaagattaaggcagggaga  
tctttg-----

-----AG--T-T-C--A-----AG---G-TCA-TC--G---  
----C-----CT-G-----CT--TG-----Cttcgtgagactgagtaac  
tgct-----

-----  
-----AG-----AT-C---C-TtgGa-----  
C-T-T--C-----C-A-T--T-----C--AC-----AGC-T----RC-NA-----  
-----C---TGaa-C---CA--T-----TG-TT-Ggg-----A--AT  
TGg--AC----T-GC---AGA--C--Tg--T----AAGtcat-----C-----  
-----  
-----  
-----  
-----  
-----

-----AA-TAAA-T-T-C-C-T-TT---A-C--TA  
T-AgAgagacattCC---AtaaGT----T-C--T-GTG--A--CTC--TAg----Ag---  
----A-----Ac-Cc--TGAC-----  
-----  
-----  
-----  
-----

-----TAAtACA-

>ORR1C

TGTggtggtttgaataagaatggccccataggctcatatatttgaatgcttggtcacca  
gggagtggcactggtttramaggattagaaggattaggaggtgtgrccttggtggaggaag  
cgtgtcactgggggtgggctttgaggtttcaaaagcccaygcca-----  
-----  
-----  
-----  
-----

-----GG--C-CcA--G-----TG--TN-TCT-CT--Ct--

----Ct----TY-CT-Gnt-GC-CT-----Ctggatcagtatgcagctc  
tcagcta-----

-----TT----TCT-C---C-A--Gcacta  
N-R-T--C-----C-A-C--TGn-----C--A-----TGC-Cg---CCaTG-----  
-----C---TC---Y---CC--A-----TC-AT-Gatgytaa-----TggAC  
TAa--CC----T-CT---GAA-AC--Tg--T----AAGcaagccccc-----A-----

-----AT-TAAA-T---G-T-T-TT--CT-Tt-TA  
T-A-Agaattg--CC---T---TG---GT-CATG-GTG--T--CTC--TTcaca-Gcaat  
ag---A-----Ac-Ag--TGAC-----

-----TAAgACA-

>LTR18B

TGTaaggtacatggatgtgctttggtcaaggaataggccgaggcggacatccaggcctgc  
atgactcagcgagtttgngcgcagggcgcacacctccacttgttatataacctgtttgtg  
taagttcatacttggctctgagccactattgtctgtaaaaggtataactgccctgctgac  
gctgtgcaggggctcttggggctcagctcggctcaacatggcttgacatgggtgggcgcg  
tggcgcccagagaaagagagagagagccagagctgtccgtcttgcagacggacagggggg  
agcca-----

-----  
-----  
-----GG--A-C-A--C-----AG-----CT-TG--G---  
----Ct----TG-CT-Cgt-GC-CC--AG-----Agagagaaagagttaagct  
gctgaccctgaaggcaagggagagccggccgcgagctgtgctggtggggcggcaggagcc  
gcagagc-----

-----TG-G---A-N---C-A--G-----  
G-C-A--G-----C-C-G--AGa-----C--AG-----AGG-Cgg--AC-AG-----  
-----TG-----TG-AGaG-----  
AG----C----T-GC---TGA-AG--Tg--T----GAG-----Aagctgct  
gatgagagagctgctg-----

-----AA-TAAAaC-CaTaT-T-TCacCT-G--CC  
T-A-Cggcccc--CCgagT---GTtctTT-CA-G-CTA--T--CTG--CCcat--Ccacc  
c----Actc--Cc-Ctc-GGACctcagcatgggctggaacctgacccccgggctg-----

-----ACA-  
>MLT1G3  
TGMcactcctccatcaagkggtagagtctatntccyctccccttgaatntgggytggnct  
ttntgattgctngaccaatagaatgcagtagaagtgatactgtctgacttcnaaggcta  
wggtcataaaaaggccatgcacttctaccttgctctcttgggangcttgctcttgggaacc

cagccaccatgctgtgaggaagcccaagccacatggagaggccacatgtaggtgttctgg  
ccgacagtcccagctgaggtcccagccaacagccagcatcaaccaccagacatgtgantg  
agtgaagaagcctccagatgattccagccccagctgtcaagtcacccccagcctctnnc  
agycmtcccc-----

-----AG--C-C-TtcA-----AG--TC-TTC-C-----  
----C-----AG-CT-GaggCC-CC--AG-----Acatca-----

-----TG-Ga-GCA-GagaC-Aa-G-----  
C-CaT--C-----C-C-C--A-----C--TG-----TCC-----MY-TG-----  
-----TG--C--CC--T-----GT-CT-Gaat-----T--CC  
TGac-CC----A-CA---GAA-TC--Ca--T---GAGca-----T-----

-----AA-TAAA-A-Tg----G-TT--GT-T-----  
T-A-Agcca----CT---Aa--GT---TT-TGGG-GTGg-T--TTG--TT-----  
-----A--C-----

-----ACA-

>LTR33B

TGTgccggattgtctgttgncaactcagcaccatccccgctcccttctangctctccct  
gtatcgcaggggctggaagcctggaactacatttcccagantcccttgccagcagggtt  
ccgnttagattctgccaatgagaggcactcgcgcgagatttgaaggcgaagagaagg  
agaagccattattctcngcggcagcngcgggcagacgcgtgggcttcggcagacggcag  
atgtgaggttttgccagcggcttcggggcatcctcctgngaataccccgcttcgggtgctg  
caggcagctgagatcatcggcggc-----

-----  
-----

-----GG--C-T-T-----CCC-TG--C---  
---Gat---TC-CT-G---CA-CT--TC-----C-----

-----  
-----

-----TG-A--TTT-C---C-T--G-----

A-A-A--G-----C-T---AG-----C--AGcggg-TTC-----CC-TGac---  
-----C---TT---C---GC--T-----CC-CC-Cag-----C--CC

TT---CC---A-AC---GGT-TN--Tg--T---AAGcctctaattccctgT-----

-----  
-----

-----

-----AT-TAAA-T-C-C-C-T-TC--CTgC--TT

G-A-Aatac---CT---A---GA---GT---G-GTT--T--CTG--TTttcctGacca  
-----A-----Ac-Cc--TGAC-----

-----  
-----

-----





attaatatttgcattaatgtcaattaatacaaaattattaatattaataaagggttcaccc

cctttatt-----

-----

-----

-----ACA-

>MLT1C

TGTtatggggttgaattgtgtcccccaaaattcatatggttgaagtcctaacccccagtac

ctcagaatgtgaccttatttggaaatagggtcggttcagatgtaattagttaagatgagg

tcatactggagtaggggtgggcccctaatccaatatgactgggtgtccttataaaaagggga

aatttggacacagacacgcacacagggagaacgccatgtgaagatgaaggcagagattgg

ggtgatgcntctaca-----

-----

-----

-----

-----AG--C-C-A--A-----GGaaCG-CCA-A-----

-----AG-AT-T---GC-C---AG-----Caaaccaccagaagctagg

ggagaggcatggaacagattc-----

-----

-----

-----T--C--CCT-Ca--C-A--G-----

C-C-C--T-----C-A-Ga-AG-----G--A-----ACC-Aac--CC-TG-----

-----C---CGa--Ca--CC--T-----TG-AT-Ctcggact-----T--CT

AG---CC---T-CC---AGA-AC--Tg--T---GAGa-----C-----

-----

-----

-----

-----

-----

-----

-----AA-TAAA-T-TtC-T-G-TT--GT-T-----  
T-A-Agccac---CC---A---GT---TT--GTG-GTAc-T--TTG--TTac---Ggc--  
-----AgccctAg-N---AAAC-----

-----TAAAtACA-

>ORR1B2

TGTggtggtttgaaatgaaaatggccccataggctcatagggagtggcactattaggagg  
tgtggccttggttgagtaggtgtggccttggttgaggaagtgtgtcacttgggggtgggc  
tttgaggtttcagaagctcaagcca-----

-----GG--C-CcA--G-----TG--TC-TCA-CT--Ctct  
cttcC-----TG-CT-G---C-CT---G-----Cagatccagatgtagaact  
ctcagctac-----

-----TT-----CT-C---C-A--G-----  
C-A-C--C-----A-T-G--TCtgc-----C--TGca---TGC-Ca---CCaTG-----  
-----C---TT---C---CC--Acca--TG-AT-Gataa-----TggAC  
TAaa-CC---T-CT---GAA-AC--Tg--T---AAGccagcccc-----A-----

-----  
-----  
-----  
-----AT-TAAA-T-G-T-T-T-TC--CT-T--TA  
T-A-Agagtt---GC---T---GTg--GT-CATG-GTG--T--CTC--TTcaca-Gcaat  
aga--A-----Ac-Cc--TAAC-----  
-----  
-----  
-----  
-----

-----TAAg-----

>LTR16E1

TGTagcagatgcctctggtgccccgcgtcacatcccctcggcccacctctgatttcagcc  
gcagctgcggtggacagttccgtgagactcacctttgctgacagcatcccacc  
tcaagcgcgcgcgctgctctttctgctttctgccccagggccttctccgacgcccggg  
agcccgcctcggcccgcgcaagcacagcccgaagtgcggggg-----  
-----  
-----  
-----

-----AG--T-T-A--A-----TG---C-CCC-CG--G---  
----G-----GG-CA-A---CC-CT-----Caaccaatgggggacggga  
gccagtggataaatgctccagcctcccgtccttcaggtggacaattctgggaggcattct  
gtacgcttctcaggaggtcccagcggaatcgagccccggtgcccacagcagcgacctcg  
ataacgcacccttatattggctt-----  
-----TT----CCT-C---C-T--T-----  
C-C-----C-T-G--Tct-----C--AC-----TTC-C---CC--G-----  
-----C--T-----CC--C-----TC-AC-----T--CC  
TG---CT---T-Cctg-GGA-TCa-Cc--Tccc-----A-----



CgC-C--G-----CgT-Gg-AG-----C--AG-----AGA-C----G--AG-----  
-----C---CG---T---CC--C-----CG-CC-Gag-----C--CC  
TGc--CCaaatT-GC---AGA-TT--Cg--T---GAGca-----A-----

-----AA-TAAA-T-GaT-T-G-TT--GT-TgtTT  
T-A-Agcca---CT---Aa--GT---TT-TGGG-GTGg-T--TTG--TTac---Gcagc  
----A-----At-Aga-TAAC-----

-----TGGaACA-

>MLT1F

TGTggtagccagcctccaagatggcccccaatgatccctgcctcctggtattcacgcct  
tgtgtagtcccctcccacattgaatagggctgacctgtgtgaccaatagaatatngcgga  
aatgatggtgtgtgacttccgaggctaggtcataaaagacattgCGgcttctgccttgct  
ctctttggatcactcgctctgggggaagccagctgccatggtatgaggacactcaagcag  
ccctgtggagaggtccacgtggcgaggaactgaggcctcctgccaacagccagcaccaac  
ttgccagccatgtgagtgagccatcttgaagcggatcctccagcccc-----

-----AG--T-C-A-----AG---C-CTT-CA--Gatg  
a---C-----TG-CA-G---CC-CC--GG-----Ccgacatcttgac-----



-----AG--CgC-A--C-----AG--TC-TCT-CG--Gtga  
c---Ct---CG-CA-G---CC-CC--GG-----Cctggcctagtgatcacct  
tctgtggccctcccgatatggacactg-----

-----TG-T--GCT-C---C-A--Gg----  
C-C-T--C-----C-T-GccAG-----C--AG-----TGC-Cac--CC-TG-----  
-----A---TT---C---CC--Tc---TGcAC-G-----CC  
Tgt--CC----A-CT---AG---C--Ct--T---G-Gc-----Tcgctgc  
actccagagggttgtttctgtggccctcccaacgcggatagcatgtgctccagrcctcgc  
aaaccagcagcagtgattctctctgcgtgyccgctaccagcctcggcttacctgtacc  
cagagggttgtttcctgcttgtctagcgactgtagaccagctctggcctgggcaaccag  
caaacttctccgccatccagtgggctgcaaccacaccttctccaacgaggtctgaacccc  
agccttggggagggagccctccttccaagtttgccttctttgggtattctctctttcct  
ttgggtattctccatcagccctagagtactcttttagagttctctttacatctttatagtta  
ctcccctatcatagtttaataattctttatAT-TAAA-----C-T-T-TC--CC-Tg-TT  
T-A-Aatt-----AC---T---GT---GT----G-GTT--T--CTG--TCtct-Gattg  
g----A-----C--Cc--AGAC-----

-----TGAtACA-

>LTR40A

TGTtgggagacaattctccatgggtctctcgcatttctgcacgtcttgtgagcagaggca  
ctgactgcctttgttctggactatcttttcaaggatgtttgtatagcgaacagccttgg  
agatag-----





aatagattaatgcctcctttgnggtgggaatgagtgagttctcactctattgtgggaat  
ctattagttcccataagagctggttgttaaaaagagcctggcacctncctcctctctctc  
tcttgcttgcttcctctctcaccatgtgatctctgcacacgct-----

-----GG--C-T-C--Ccc---TT--CC-CCT-T-----  
----C-----AC-CT-Tcy-GC-CA--TG-----

-----AGtG--GAA-G---C-A--G-----  
C-C-T--GaggccC-T-C--AC-----C--AGa---TGC-A---GA-TG-----  
-----C---TCg--Ca--CC--A-----TG-CT-Ttttg-----T--CC  
AG---CC---A-GC---AGA-AY--Ta--T---GAGcc-----A-----

-----AA-TAAA-C-CtC-T-T-TT--CT-T--TA  
T-A-Aattac---CC---A---GC---CT-CA-G-GTA--T--TCC--TTtata-Gcaac  
ac---A-----Aa-At--GGAC-----

-----TAAgACA-



gacccctgggtcacgggtcggacaactaggcattaggccgtccgccaggtaaaagaagta  
tcccgtgaaaggcacactgtaaacacccacgtccagctccccttcatttcccgttagggc  
agggttgctagccgctctggtactggaaccccaatttagctgggggctctc-AAaACA-

>LTR66

TGTggaggaaaagttaaatattaattgaactcaattgaacatggacacaaacaatggt  
caccaagtcttggaacagggttggtgagccccttgaggcattcatccagcgtgtttcgg  
agaaatctctatttcaatctattcctatacattagttattgaaaaacaatagacaatcac  
aaaaacaagttgacctttttgtgttcttgagcccagtcgtgaagggccctcgtgactgg  
gcctcatgccaacaactcgttacaaaaag-----

-----AG--C-T-A-----G--GG-TCC-CA--G---  
-----A--CT-G---CR-CCraAG-----Cttcatgagacctctcctc  
gtctgtgcacggatgag-----

-----TG-G--CC-----G-----  
A-C-T-----C-T-Gg-AGcc-----C--AG-----GC-T----GT-TG-----  
-----C---TT---C---CC--Agtc--TG-GT-Gg-----Tg---

AAt--CC----T-CC---ATAgTC--Tgg-T----GAG-----Tgtaaata  
tatatatatatatatatacatatatatatatcttttcccttctccccttcccattgca  
atttgcttattatatcaatttgcttattatatcatttgcttattatatctgcattgccat  
ttacgtgg-----

-----GA-TAAA-G-C-T-T-G-TT--TA-Cc-CT  
T-A-Aag-----GT---A---TT---GT-GTGT-GTG--T--CTT--TTctt--Ct---

-----C-----C--Cc--TCACgcggtttcccgcacaga-----

-----

-----

-----

-----

-----ACA-

>ERV3-1-LTR\_XT

TGTagtgcagtaggtttcttttactatgatttgatgatttacaatttatacatgcttta  
atatgtgatgtatatatatatgtatatgggttagttagtaagtttaatacaagcaattct  
agagataaggggagtcagtgctcctgtacatatattggtgggtaacaatacctgcggtt  
attatgtaacaataaacaatgactatagactgtttaccagcaaatacaacaagcggacg  
gcaggcagacaatgcccaatgtatttaataagaacttgaggtataaagtttggtatctg  
atcagacacaatggctgaccatttgtaacaataattggtcaagtcaatagttgggcttg  
ggggttttctcctaagaacttttggcataaaagaac-----

-----

-----GG--C-C-T--C-----TG-----CCT-TG--G---

----GtcagaAG-CT-Tc--GC-CT--AGga-----Ctcctgaacgagtgccagg  
atattggatcatcgcgatggttatcggaacctgaaggttttgcaccaaagggtg-----

-----

-----

-----AG-G--G--G--C-T--C-----

C-C-C--G-----AgT-T--TG-----C--TGga---TTA-At---GC-TGaa---

-----C--TG-----GC--Ta---TC-TT-----T--GT

AA---CC---A-C---AAA-AC--Cg--TAcg-AAGc-----T-----

-----

-----

-----

-----

-----

-----  
-----AAGTAAA-T---G-T-T-TT--AAaT--TC  
T-A-Tta-----CT---At--GT---GT-GTGT-GTAagTtaTTG--CTc----Attt-  
-----A-----At-Ag--T---ttttcatcagaaggtttaatcattgatcctgttaatat  
aaataatattgataaagggttaaccctttatt-----  
-----  
-----  
-----

-----ACA-

>MER70A

TGCaggacagtttctccgggtggccttggaccgaccagtttctccccnctttctcgcttgt  
agttctcaagaataactgtagaatgtgctgggaatgcaacatcctgagatagggaggaac  
tggccggaacagcccgggctctgttccagtcctcctagaaacaggatgtccttcaacgc  
tttagcccagcgagtcatgtngcccctgaggtataaaaccagggcgggctgctttccgg  
ggtccctcagctgcggtgcaagtggggcacgcgc-----  
-----  
-----  
-----

-----AG--N-C---G-----AG--AC-TCC-----  
-----AT-CC-G---CC-CTg-GG-----C-----  
-----  
-----

-----AG-C--TTT-C---C-T--Gag---  
C-C-T-----T-G--GGgga-----C--CGgc---TCG-C---NA-TG-----  
-----Aa--TC---CtagGC--Ttc---TG-TT-Gtc-----C--CT  
TG----C---T-GC---CTA-TC--Tg--T----AAG-----T-----  
-----  
-----

-----  
-----  
-----  
-----  
-----  
-----AA-TAAA-C-CcG-C-T-TC--AT-G-----  
T-A-Actt-----GT---Tgc-GT---GT-GTGN-GTGt-T--CTG--TCt----C-----  
-----A-----C--C---GGACTcagacaagttggtaaccagtgcacagtgaacctgctt  
c-----  
-----  
-----  
-----  
-----  
-----ACA-

>THE1C

TGAtatggtttggctgtgtccccacccaaatctcatcttgaattgtagttcccataatcc  
ccacgtgtcgtgggagggaccggtgggaggtaattgaatcatgggggcggttaccacca  
tgctgttctcgtgatagtgagtgagttctcacgagatctgatggttttataagg-----  
-----  
-----  
-----  
-----  
-----  
-----GG--C-T-T-----TT--CC-CCC-TT-----  
-----TG-CTcG--GCaCT--T-----C-----  
-----  
-----  
-----  
-----T--C--CTT-G--C-T--G-----  
C-C-G--C-----CaT-G--TGAagaaggacG--TGtt---TGC-Ttcc-CC-TT-----  
-----C---CG-----CC--A-----TG-AT-TgtaagtttctgaggcctcC--CC

AG---CCa---T-GC---TGA-AC--Tg--T---GAGtc-----A-----

-----

-----

-----

-----

-----

-----

-----AT-TAAA-C-CtC-T-T-TC--CT-T--TA

T-A-Aattac---CC---A---GT---CT-CG-G-GTA--T--GTC--TTtattaGcagc

gtgagA-----A--C---GGAC-----

-----

-----

-----

-----

-----TAAtACA-

>MER70C

TGTtgggaaaggcagtcctcatgcatgcagtcctttcgacccccactcagccgcataagaat

gggccttgggcctggaacacttccttaccaagagataaagagtcctcacagcctgtgctg

gacttatcaccttgtgtgggaatatctttccctgtttcagactcaatgtgtactcctttg

ttctgcttaagcgtgtgcgtcatatggcacctggccaacccccactgctatatctgtcccc

tgcggggaggggacggggtccttctgctgcagcacaagaggagggtggctgtgtgcctgca

-----

-----

-----

-----GG--C-C-A--A-----TT--GC-CCTgCG--T---

----C-----RG-CT-G----C-C---GG-----G-----

-----

-----

-----

-----AG-GgaCCC-G---C-T--G-----  
G-C---C-----A-T-G--GGgga-----C--CG-----ACG-C---CC-Acta---  
-----C---TGa--A---GC--Tga---TC-TT-G-----C--TC  
TG---TC---T-CT-----TC--Tc--T---ATG-----T-----

-----GAgTAAA-----G-C-G-TT--GT---TC  
C-A-Tccagtg--CT---T---GA---CTgCGTT-GTGt-T--TTC--CTt----Ggcg-  
-----A-----Ct-CcgaTACCaagatgcagtgggcagaagtgctcggacttctactcct  
gataataggcaacagatgccacttgctcg-----

-----ACA-

>ORR1C1

TGTggtggtttgaataagaatggccccctcccataggcctcatatatttgaatgcttgg  
tcatcaggagtgccactacttgagaaggattaggaggtgtggccttggtggaggaagtg  
tgtcaacttggggggtgggctttgaggattttcaaacagcccaagccaggcccagt----

-----GG--T-C-T--Ctc---TG--GC-TCT-AG--T---  
----Cc----TG-CT-G----C-CT---G-----Cagatccagatgtagagac



tctcagctacttctccagcacca-----

-----

-----

-----TG----TCTgC---C-T--G-----

C-A-T--G-----C-T-G---C-----C--A-----TGC-T-----C-TC-----

-----C---TG-----CC--A-----TG-AT-Gataa-----TggAC

TAaa-CC----T-CT---GAA-AC--Tg--T---AAGccagcccc-----A-----

-----

-----

-----

-----

-----

-----

-----AT-TAAA-T-G-C-T-T-TC--TT-T--TA

T-A-Agagttg--CCg--T---G----GT-CATG-GTG--T--CTC--TTcaca-Gc---

-----A-----At-A---GAACactacgtgacttaagtggtt-----

-----

-----

-----

-----

-----ACA-

>MLT2D

TGTgatagttaatTTtatgtgtcaacttggctaggctatggtgtccagacgTTTggtcaa

acattagTctgggtgTTTctgtgaaggTTatTTTTTggatgagattaacattTaaatcgg

tagactgagTaaagcagattaccctccctaagtgggtggacctcatctaatcagTTgaa

ggcctgaatggaaaaaaa-----

-----

-----

-----



accctccagcaagtttcgccggcaccctgtaaagtcttgtagctccccagaggggtggc  
ttcccagtgagtttcaccagcattccagaggcctgcttcccagtgagtttcactggcaac  
cccagcaggcggtttccagccaccccc-----

-----GG--C-C-T--G-----TG--GCaCCT-CA--G---  
----Ca----AA-CT-T----C-TC--TG-----Ccatccastgggccacacc  
atctccacataggagtttagatctcagcgttggagagrgcctccttccaagtttgttcct  
tcct-----

-----TG-G--GTA-Ct--C-T--G-----  
C-C-T-----C-A-G--CC-----Ct-AG----AGG-TagtgGC-TG-----  
-----C---T---C---CC--Ta----T--AT-C-----T--GC  
TAtt-CC----T-GT---AT--TC--Tt--Ta---GAG-----Ttctcttt  
acccttcttagttaatcctattattaattaattcttagttattataataattctttat-

-----AT-TAAA-----M-T-T-TC--CC-Tg-TT  
C-A-Aa-----TT---A---CT---GT-TGTG-GTT--T--CTG--TCtct-Gactg  
g----A-----C--Cc--TGAC-----

-----TGAtACA-

>MLT1D

TGTggtaggcwggaataatggcccccaagatgtccacgtcctaataccccggaacctgtg

aatatggttaccttacatggcaaaagggactttgcagatgtgattaagttaaggatcttga  
gatggggagattatcctggattatccgggtgggcccgaatgtaatcacaagggtccttata  
agagggaggcaggaggggtcagagtcagagaaggagatgtgacgacggaagcagaggtcgg  
agtgacgacgttgctggctttgaagatggaggaagggggccacgagccaaggaatgcgggc  
ggcctctagaagctggaaaaggcaaggaaac-----

-----GG--A-T-T--C-----TC-CCC-TA--G---  
-----AGcCT-----C-C---AG-----A-----

-----AG-G--AAC-G---C-A--Gc---  
C-C-T--G-----C-C-G--ACac-----Ct-TGattttAGC-----CC-AG-----  
-----TGagaC---CC--A-----TT-TC-Ggac-----T--TC  
TGa--CC----T-CC---AGA-AC--Tg--T---AAGa-----T-----

-----AA-TAAA-T-TtG-T-G-TT--GT-T--T-  
T-A-Agcca---CT---Aa--GT---TT--GTG-GTAa-T--TTG--TTaca--Gcagc  
-----A-----At-Agg-AAAC-----

-----TAAAtACA-

>LTR16C

TGTagcagacgctgtcgggtgtcctggctcatcaccctcagccctcaacatttcnatgt  
acactggccccgacttccaactgccagcacctgcancctctctgctgagggctttctctgg  
ccgcgggagccccgctctgccccgcgcgaggccggaagtgccggggaattaatgcc  
cctnggaagcagccctcaaccaatgacngatgggagttggtgtataaatacccccagctcc  
ctcgccccctcgggtgggataactctgagggcatgtgttct-----

-----A-C-A--C-----TG--TC-TCC-CA--G---  
-----AG--T-T---CC-CC--AG-----Cgggattgagctccagttg  
cccacagtggtaactngcttgataacgcaccctttat-----

-----TG-G--CTT-C---C-T--Tc-----  
C-C-TtcC-----C-T-G--Tct-----C--AC-----TTC-C---CC-A-----  
-----C---TC---C---CC--TaccagTG-TT-----T--CC  
TGggaTC---A-CC-----TC--Cc-----A-----

-----AA-TAAA-C-T-A-C-T-TG--CA-C--TC  
G-A-Atc-----CT---T---GT---CT-CAGG-GTC--Tg-CTT--CTg----Gggg-  
-----A-----Ac-Cc--AAAC-----



T-A-Agcca----CT---Aa--GT---TT-TGGG-GTGg-T--TTG--TTac---Gcagc  
a----At----Ag-C---TAAC-----

-----  
-----  
-----  
-----  
-----TGAtACA-

>MLT2B4

TGTgatggttaatTTtatgtgtcaacttgactgggccatrgggtgcccagatatttggtc  
aaacattattctgggtgtgtctgtgaggggtgtttctgggatgagattaacatttgaattg  
gtagactgagtaaagcagattgccctccccaatgtgggtgggcctcatccaatcmgttga  
aggcctgaatagaacaaaaaggctgactctcccctgagtaag-----

-----  
-----  
-----  
-----

-----AG--A-G-A--A-----TT--CC-TCC-TG--C---  
----C-----TGaCT-G---CC-TT--TG-----Aactgggacatcgggtcttt  
ttcctgccttttagactcaaactgaaacatcagctcttctcctgggtcttaagcctgctggcc  
ttcagactggaactacaccatcggctctcctggttctcaggccttcagacttgactgga  
actacaccatc-----

-----AG-C--TCT-C---C-T--Ggg---  
T-C-T--C-----C-A-GctTG-----CcaAC-----TCA-C---CC-TG-----  
-----C---AG-----A-----TC-TT-Gggactt-----C--TC  
AG---CC---T-CC---ATA-ATcaTr--T----GAGccaattcctta---T-----

-----  
-----  
-----  
-----

-----  
-----  
-----AA-TAAA-T-CtC-T-C-TC--TT-N--TA  
T-A-Tatanta--CC---Aca-TC---CT-ATTG-GT---T--CTG--TTtctctGgag-  
-----A-----Ac-C-----C-----  
-----  
-----  
-----  
-----  
-----TAAtACA-  
>MTC  
TGTgctggctagttttatgtcaacttgacacaagctagagtcatytgagargagrgaacc  
tcaattgagaaaatgcctccataagattggcctgtaggcaagcctrtaggrcattttctt  
aattagtgattgatgggggagggcccagcccattgtgggtggtgccayccctgggctggt  
ggtcctgggttctataagaaagcaggctgagcaagccatgaggagcaagccagtaagcag  
cactcctccat-----  
-----  
-----  
-----  
-----GG--C-C-T--C-----TG-----CAT-CA--G---  
----T-----TC-CT-G----C-CT--C-----C-----  
-----  
-----  
-----AG-G---TT-C---C-T--Gc-----  
C-C-T--G-----C-T---TG-----AG-----TTC-Ctgt-CC-TGa-----  
-----C---TT---C---CT--T-----CG-AT-Ga-----TgaAC  
Tgt--GA---T-GT---GGA-AG--Tg--T---AAGcc-----A-----  
-----







-----GcgGAAATA----AA-----Tt-A  
--AG--T-----Ttatttattgtagt----T--T-----  
--ATc-TAAttt---ACGTT--G--TgtcgtaaacaCT-TA--TT-----CGgccacA--  
-----Tatcacacg-----G---CAA-CGTAAAA

>GYPSY58\_LTR\_AG

TGTTGT-Gagctaacctggccccggactcattcacggcggttaactcacgga-----  
-----  
-----T-----GACAG-C--A--A--A--Gcgtcatccgtcaatgta---  
-----  
-----T-GCGTGTGAT-----C-GaT--C-cgggggtcatcggttgcgcggt  
cacggacggttgaccgccaacaccagcgcgcactgaagaactagcggtcagcaaggaagc  
gtgctcgaagccaacaccaaattgtaaccaagtGA--AG-----  
-----  
-----T--TGAATA----TAtacgttaGtaA  
--AT--T-----TA-----T--T-----  
--AG--TAA-----CGCGT--G--Agt-----TT-TA--TT-----CG-----A--  
-----Ccacctctgcatcga--A---AGAACATAAAA

>GYPSY28\_LTR\_AG

TGTTGT-G-----  
-----  
-----  
-----T-----ACAA-Cg--g--G--GA-T-Gggaa-----  
-----  
-----T-GTGACACTTca---C-G-G--CC-----  
-----  
-----A--AGgtatatgtttaccttacagtg  
tgggaaccttggaagaaaagggggttccggaagaagaactgtcagagggagaacaaaa  
gggaagcctacgagctaggaagcaattacgaggcA---GAATA----AAt-----Aa-T

--AC--A-----GTgaac-----T--Acg--  
--AT--AAAt-----AAC-T--G--T-----TC--CT-----TA-----A--  
-----Ttac-----A---AAGATACAACA

>GYPSY19\_LTR\_AG

TGTCAT-A-----  
-----  
-----  
-----Tactgtct--GACAG-C--T---GtcCA-TcGacagaaac-----  
-----  
-----T-GCTAGT-TG-----G-G-TagCA-----  
-----  
-----AacAGctgtcagtg-----  
-----  
-----A---GAATA-----AAcg-----Gc-A  
--CTctgT-----GTctgaact-----AcgA-----  
--ACg-AAAcA---CATGT--G--T-----C-TTccTT-----CC-----A--  
-----C-----G---AGT-TATAACA

>GYPSY66\_LTR\_AG

TGTTAT-G-----  
-----  
-----  
-----Tat-----GTGAA-C-----G--CA-G-Gata-----  
-----  
-----A-GTGACAGA-----C-G-T--CA-----  
-----  
-----Ac-AGctgtcatccaagcagaccacg  
ccgcttgcgctccgctttttggacttcttcttttctctccgattgccattgttatcgcg  
tataaaacgaattg-----T--GTAA-AcccgAA-----G--T  
--AT--T-----Ttttc-----T--A-----

--AT--AAA-----CCAGT--G--A-----A--CT-----CA-----Caa  
cag-----T-----A---AATACAGAACA

>GYPSY57\_LTR\_AG

TGTTAT-G-----  
-----  
-----  
-----G-----GCCAA-Cc-T---G---A-T-Gatcccgtagatcgctaccga  
ggacactcatcgggcgtagatcgaagtgtgtgtgcgatctatcgggaggtcagcgaacgc  
gcgctcggcacgaT-GCGTGAGTGc----C-GaT--CG-----  
-----  
-----A--GGgaaagatatggcgcgcgctt  
gagaaaggtcgtggaacaaagtggcggcaaaattgtttacgagttatt-----  
-----A--ATAATA----AAcaa----Gg-A  
--CT---Ttccaatcccacgt-----TT-----Tg-A-----  
--AG--GAAgt----AACGC--G--Ttaacg-----TT-TC--TT-----AG-----Cg-  
-----Ttcttcgaaagaaaac--G---AAAATATAACA

>GYPSY24\_LTR\_AG

TGTTAT-A-----  
-----  
-----  
-----T-----ATGAA-CccT---G---gT-A-----  
-----  
-----T-TTGACAGTT-----GtG-T--CAtaacgcctg-----  
-----  
-----Ac-AGgttgaccctacctttcgtttg  
ttgttaaagtgcattccttctttacaccttattgaattcgtttggttactt-----  
-----T--TTGCTA----CA-----Ac-T  
--CC---T-----TA-----A-----  
--AC--AAAcct---CATGT--G--Aac-----TT-TT--CTgcc--TA-----A--

-----Taaagagaatt-----A---AATACATAACA

>GYPSY64\_LTR\_AG

TGTTGGcA-----  
-----  
-----  
-----G-----GACAG-C-----C--CAcT-Gtgcggtgtgaacccttcgg  
ctagcagtgcgtccacctgcatttctatacgcacatctcggggtgaca-----  
-----A-GTGACAGCTgc---C-G-----G-----  
-----  
-----A--TGccgggggcaca-----  
-----  
-----Tg-GGAA-A----AA-----Gg-A  
--GT---A-----TTgtac-----A--Agagac  
gcAT--GAGat----AAGGTa-G--T-----G-AA--AT-----AA-----Ag-  
-----Tacaa-----G---AAAACGTAACA

>GYPSY23\_LTR\_AG

TGTTAT-A-----  
-----  
-----  
-----TacaacattGACAG-C--TatgG--CA-T-Gttggcagctc-----  
-----  
-----T-GCGACTGCT-----C-G-----A-----  
-----  
-----AcgAGcagcactgctcgaaacaggaa  
gggagcgaatgaaatgctc-----  
-----A--TGCATA----CAa-----Gg-A  
--AC---T-----GAat-----A--A-----  
--AG--AAAa-----CGCGT--G--Taacatt----TG-TA--CT-----GC-----A--  
-----Tc-----A---AAAATACAATA

>GYPSY25\_LTR\_AG

TGTTAT-Ggccaacctgcctaacggctaagggcactcaccgaagacaggcaatggtctt  
cgggtgatgtg-----  
-----  
-----T-----GAGTG-T--A---G--CA-G-Gtcgggcc-----  
-----  
-----A-GAGAGAGAGccgagC-G-G--CA-----  
-----  
-----A--AGTgcattattatactgtaggct  
atcgcacgggcaacaagaggag-----  
-----A--TAGATA----AA-----Gg-C  
--AT--A-----TTccata-----T--Attc--  
--AG--AAAgacg--AAAGT--G--Tac-----TG-TA--TT-----CG-----A--  
-----Tagaaggggtggc-----G---ATATCACAACA

>GYPSY62\_LTR\_AG

TGTTGG-A-----  
-----  
-----  
-----T-----CCCAG-T--T---Ac-CA-C-----  
-----  
-----A-GGGATA-AT-----G-GaA--CAcatagcaacacttagaaagcat  
agcaaccatgCGgtataaaaggagccgatagctcatcaccgctttactctg-----  
-----A--AGttgattttc-----  
-----  
-----A----AATA----CA-----A--A  
--AC--T-----TT-----A--A-----  
--CTt-GAA-----CCTGT--G--T-----G-TA--ATagtc-CG-----Ag-  
-----T-----AgttCGGACATATCA

>GYPSY3\_LTR\_AG

TGTTGC-A-----  
-----  
-----  
-----T-----AG-T--A---A--CA-C-Gcataacgcagtaacat-----  
-----  
-----T-GCAAGA-CT-----C-GaT--CA-----  
-----  
-----G--AGtacacattg-----  
-----  
-----Ag-TGAATA-----AA-----G--A  
cgAT---Tccattctgaac-----TA-----AggA-----  
--AT--AAAg-----CAGTT--G--Tgt-----TT-TT--CT-----CA-----Aga  
tatattcccT-----G---CGA-CATATCA

>GYPSY69\_LTR\_AG

TGTAGA-Gaataatagtaataataacaataataaatttagaaattaaatttaaaa  
taaaatgattgttaccattaaagtgaagcttagaattgatcgcgagaggaaaggaaaag  
agagaaatagcgatagaacgagaagcgtatcgacaagtgagagactcgcggttgcgac  
aagtgaacgT-----GAGAGaC--T---G--CA-C-Ggtgagatgctacacggtgag  
aagagttcaacatagaaacgcgttttcaagagaggagcaactcggtgagatcgca-----  
-----T-GTGAGAG-----C-G-G--CAggatggaaacgaaacgcgaaaa  
ggcgatcagtttttgacagacgtagaaaagac-----  
-----A--AG-----  
-----  
-----Tc-GCAATA-----AA-----A--A  
g-AG---T-----GTcccagcagtaaaaaaA--A-----  
--AA--AAAa-----AAAGT--G--Ttaaaa-----TG-TA--TA-----AC-----A--  
-----TcaatgatgacaagggtG---CGGTTACGACA

>GYPSY21\_LTR\_AG

TGTAGT-Aggctatgactacta-----



-----  
-----  
-----T-----GACTA-CcaA---A--CA-G-----  
-----  
-----T-GGGATTTTG-----C-C-T--CA-----  
-----  
-----Gc-AGaatttcacttcctagggcatag  
tagcctatgccatggtt-----  
-----A--GTAATA----AA-----Gc-A  
--GT---Tcatag-----TT-----A--Acc---  
--ACc-AAActag--CAAGTtgG--Tt-----TT-TA--TT----TG-----C--  
-----Tctctgtgt-----G----AACTGTAACA

>GYPSY60\_LTR\_AG

TGTTGT-Ggtcacgaagtggaaggctccctttattcggcgt-----  
-----  
-----  
-----T-----AAGAA-C-----G--TA-T-Gcagccactg-----  
-----  
-----A-GTGACTGATgag--C-GgT--TA-----  
-----  
-----Gc-AGacgagagagcgccagacgctc  
gtgggacaccgctcgggaacacaagggctgatcg-----  
-----T--GTAATA----AA-----G--T  
--AT---TgtgtattgtttattacgtgttcggGT-----A--A-----  
--ATa-TAA-----ACTGT--G--T-----aTA--CTctcggCC-----A--  
-----T-----C---CGAACACAACA

>GYPSY67\_LTR\_AG

TGTTAT-Ggtgaatattttgccttagtgagccaacctgtatgtatcacggctctcactga  
-----

-----  
-----T-----GAGTG-C--Ac--G--CA-T-C-----  
-----  
-----TcGTGAGA-TGc----C-G-T--TAggttcgggcttatgacgtgatc  
cccgaaggatcactctctctccggcgcgcctccaattagg-----  
-----At-AG-----  
-----  
-----T---GAATA----AAc-----G--T  
--TT--T-----TAtatgtgt-----T--A-----  
--AC--TTAtt----CGCGT--GcaTtcgtccacc-TC-TT--TT-----AA-----A--  
-----Tgcatgacga-----C---AGACCTTAACA

>GYPSY63\_LTR\_AG

TGTTGG-A-----  
-----  
-----  
-----Tat-----CACAG-T--Ac--A--CA-T-Gtacaacatatagaat----  
-----  
-----A-GTTATTGTA-----C-GaT--CG-----  
-----  
-----T--AGtatacatttataaccttatag  
aatagtcagt-----  
-----T--GGAATA----AA-----Gc-T  
--AT--T-----A-----  
--ATctGAAc-----ACATC--G--T-----AG-T---CTgg---CA-----Ac-  
-----T-----A---AGTATATAACA

>GYPSY68\_LTR\_AG

TGTGGT-A-----  
-----  
-----

-----Tgt-----GAGAG-T--A---G--CAgT-G-----  
-----  
-----T-GGGTGTGCG-----G-G---CA-----  
-----  
-----Gt-AGgaggttgg-----  
-----  
-----Ac-GGAATA---AA-----G--A  
--GC--A-----GAcgtgtg-----T--T-----  
--ACT-GTAgtt---CCGGT--G--T-----T--TT-----CG-----A--  
-----T-----G---GAATATCACA

>GYPSY20\_LTR\_AG

TGTTAT-A-----  
-----  
-----  
-----T-----CTGAG-C--T---A--CA-C--ttctggcagcactggagctg  
tcatacgctattccccatacacaccgtggatgaacaactaccttcatacacaccgtgg  
tatgaat-----A-GCTAGA-TT-----C-T-A--TAtacactgcgatcgcttccgcta  
ccgttctacgacacttgaagaagagaagccgaactac-----  
-----A--AGcactac-----  
-----  
-----A--GGACTA---CA-----Aa-T  
--AT--A-----Tttaga-----T--Agag--  
--AT--AAAacagttCGGTT--G--Taaa-----TT-TA--CT-----TA-----A--  
-----Ttacggttccgcc-----C---CATCTACAACA

>GYPSY65\_LTR\_AG

TGTGGT-A-----  
-----  
-----  
-----Tgtggtgt-AAGAG-C--Tcg-G--CT-T--tattccgctcct-----

-----  
-----T-GCTAGAGCG-----C-G-G--TAtaatctgacaacgatgacag--  
-----  
-----At-AG-----  
-----  
-----Tc-AGAACA----CA-----T  
--AC--A-----GA-----Acgg--  
--AGt-GAAgcc--AGATC--G--T-----G-TA--TT-----AC-----Agc  
aagc-----T-----A--C--CCACCACA

>hmmcons

TGTTGT-A-----  
-----  
-----  
-----T-----GACAG-C--T--G--CA-T-G-----  
-----  
-----T-GCGAGAGTT-----C-G-T--CA-----  
-----  
-----A--AG-----  
-----  
-----A--GGAATA----AA-----G--A  
--AT--T-----TT-----A--A-----  
--AT--AAA-----CAAGT--G--T-----TT-TA--TT-----CA-----A--  
-----T-----G--AGAACATAACA

.....

**Retrofit\_150**

>RETROFIT\_LTR

TG-----TGAA-----A--CAG----TctgttctA--T-----  
--T--ATCC-Tggacatgagatataca-----T--GCAT--Gctccagtacat  
gcgatgctctag-----

-----Tac-----Tg-GGAT-AtgG-----  
-----T-Tc-----GT-TA-Gg-ATAag-----GA-Ga-----T-T-Atctc  
caa---A-T---T-----TGT-----TtcacctTC---Tta-----  
-----TCca---T-----TGT-A-----A---Ctga---A-----  
-----TAC-----TGT  
A-Ag---CCA-C---Ggtaga-----G--GCTGTTtCTa-CCaC---TATT-----T-A-  
AC-----Agaga--T-GCGG-CC----CAA-G---G-----Caa--A  
-G-G---GTT---TA--A--C-----GC-TT-----CAcA-TT-----T  
taTCA-----CA

>RETROFIT4\_LTR

TG-----TGAA-----A--CTA---T-----A--Ttg---  
--T--ATAC-A-----T---GCGT--G-----  
-----Tgaga-----Tc-TGTT-A--G-----  
-----A-Ttg---GA-TAaG--ATA-----GA-Gt--T-TGT-T-A---  
-----G-G---T-----TGT-----TAgcc--TC---Ttcta-----  
-----TCca---TcaaacagactTGC-A-----Tg--Ct-----A-----  
-----TATgga-----TGT  
AaAaa--CCA-C---Ggtgat-----G--GTTGTTaTCa-CC-A---TATA-----TtA-  
AC-----Aaagg--T-GCGG-CC----TCT-A---A-----C---G  
-A-G---GTT---CA--A--C-----GC-TTctgc-----AcC-TCTgA-TT-----T  
--TCA-----CA

>COPIA-43\_SB\_LTR

TG-----TTGA-----G--ATA---Tg-----A--Tgactt  
g-T--AACT-Acttgtagc-----T---ACTT--G-----  
-----T-----Ac-TAGA-A--G-----  
-----A-TatgacgCA-TG-T--ATCtagc-----TA-Gg--T-GGT-T-A---  
-----T-C---Taga---TGA-----GA-----TC---Tttgagagt-----

-----TTg----T-----TGT-A-----A---Ttc-----A-----  
-----TCTtcttgTgTGT  
A-Ag---CCA-T---Gcagag-----G--GCTATTcTct-GC-A---TATA-----TtA-  
AC-----A-----T-GCAA-CC----GAGaG----C-----Ccca-A  
-A-G---GGT---CA--T--C-----TC-GTT-----CaC-CCT-A-AT-----T  
--TTA-----CA

>COPIA-17\_SB\_LTR

TG-----TTAA-----A--GTA-----Ac-Ttg---  
--T--AACCcA-----A---GTCTa-G-----  
-----G-----Tc-GGTTgA--G-----  
-----A-T-----TA-Gg-ATC-----T-TGT---A---  
-----T-----TGT-----TA-----TCcc--A-----  
-----TG-----T-----TGT-A-----A---C-----cttgTgta  
ctcttagttagttatccaagatctcaaccgacctaacca-----AAT-----TGT  
A-Ag---CCA-C---Gtgaga-----G--GCTCTTtCTc-AC-C---TATA-----TaA-  
AC-----Aaagg--T-GCGG-CC----TCC-T---A-----Cg---G  
-G-A---GGTt--CA--A--C-----GC-TT-----C-CCAaA-TTa----C  
--TTT-----CA

>RETROFIT3\_LTR

TG-----TTAGttagcatgaaaggTtcg----GA----Tc-----A--Tg----  
--T--GATC-Acgacctgacagct-----T---GCAT--Gcatgtagttgt  
tgaggTtagtttga-----  
-----T-----Ta-GGTT-A--GtctatccatgCGgatcaggTtagccttt  
cctcca-----CA-TGcG--ATAaca-----GAtGt--T-TGT-T-Aga--  
-----G-T---T-----TGT-----TT-----TC---Tg-----  
-----TTt---Tc-----TGT-T-----A---C-----tgcAtgCag  
tcgTttcatcaatctcggcttcggTtGttctcagctgCgcccga---ACTc-----TGT  
A-Tcg--CCA-C---Gatggg-----G--GCTGTTcCCa-TCaCataTATA-----TtA-

AC-----A-----C-GAAG-GC----GAC-G----C-----At---A  
-G-GattAGTgc-GA--T--C-----GT-TTC-----CaC-CCA-A-ACTaa--T  
--TCA-----CA

>COPIA-125\_SB\_LTR

TG-----TTAG-----A--CAA----Tagg----A--Tagtat  
--T--GTCT-Tggtacattgaa-----T---GTGT--G-----  
-----  
-----T-----GCT-A--Ggcttagggttggtgagcacgccacacag  
-----GT-TG-Tt-ATC-----A-Gg--T-TGT-T-Ata--  
-----G-CacaT-----AGA-----TA-----TC----Taggagat-----  
-----TTg----T-----TGT-A-----A--C-----A-----  
-----AACatcaatc-TGT  
AgAgg--CCA-C---Gtaggg-----G--GCTCTTcCct-AC-C---TATA-----T-A-  
AC-----A-----T-GCA--CC---GAGaGtt--C-----Ct---G  
-G-At--GGG---CA--A--Ctc---TC-GTT-----C-T-CCT-AgTT-----T  
--TTA-----CA

>COPIA-26\_SB\_LTR

TG-----TTAG-----Aa-ATA----Gg-----A--Tccat-  
--TgcATCT-A-----gacGCAT--G-----  
-----  
-----Gcgtctc-----Tt-GACT-T--Gtactcaaagtaaate-----  
-----A-Tg-----CA-TG-Ta-ATTtagcc-----TA-Gt--T-AGT-T-A----  
-----G-C---T-----AGGa----GA-----TAga--Tatttctgttttg-----  
-----TTg----T-----TGT-A-----At--CtcctgagA-----  
-----TCT-----TGT  
A-Aa---CCA-C---Gcaagg-----G--GTTGTTcCtT-GCcC---TATG-----TtA-  
AC-----A-----C-GCAG-CC---GAGtG---C-----Ctc--A  
-A-A---GGGc--CA--A--C-----TC-GTT-----AaC-TCC-A-T-----T  
--TTA-----CA

>COPIA32-ZM\_LTR

TG-----TTAG-----At-AGA----Ttct----A--Tgattc  
a-T--GTTT-Atcttcct-----T---GTAT--Gcttatcccctt  
gtaactcggaaacaaccagtagagtcggcca-----  
-----Ag-GAAT-A--G-----  
-----A-T-----TA-G--ATTgg-----TT-Tat-T-TGT-T-A----  
-----G-C--C-----CT-----TA-----TC----Ttggaccgaagatatac----  
-----TCatggtT-----TGT-T-----A---Cg-----T-----  
-----TAA-----TGT  
AaA-----TC-T---Gaa-----Gc-GCGCTT-TGt-CG-C---TATAag---T-A-  
AC-----A-----C-GCAG-ACa---GCC-A---Cgg-----C---A  
-A-A---GGT---GA---g-Ct---GC-TTC-----AcC-CCA-A-TC-----T  
--TC-cgcgctctgattttctatatggatcgcgagcCA

>COPIA6-SB\_LTR

TG-----TTAG-----A--ATA----Gca-----Ac-Taactc  
--T--GTAA-A-----G---ATAC--Ggcaaatagaccg  
taatcaacttggctacgtccaggttctaggtggt-----  
-----T-----Tc-GGTT-A--G-----  
-----AgTa-----GA-TA-Tg-ATCtt-----TA-Gt--T-TGT-T-----  
-----G-----T-----AAT-----TA-----TC----Tcaacggaaacctcat----  
-----TC-----T-----TGT-A-----A---Cac-----A-----  
-----AATt-----TGT  
A-Aa---CT-----CTATAt-----A---TATA-----TgAa  
AC-----A-----T-GGAA-CC---GTG-GgatgC-----Ca---A  
-G-At--AGG---CT--Ac-C---AC-GTT-----AgC-ACA-A-TT-----C  
--TTT-----CA

>COPIA-55\_SB\_LTR

TG-----TTAG-----A--ATA----T-----Ag-Tagctg  
--A--AAAT-Agtgtgtgtgttagcgg-----T---GCAT--Gttagtgtgttg



aatatggttagaagcatgacacatggcacaatattcagcagta-----  
-----T-----T--GAAT-A--Gacgccatac-----  
-----A-Tg-----CA-TA-Gg-CTAga-----GA-Gc--T-TGT---A----  
-----G-A---T-----TAAgtc--AAg----TC----T-----  
-----TTa----T-----TGT-A-----Aa--Cg-----A-----  
-----TCTcca-----TGT  
AcAg---CCA-C---Gaaggg-----G--GCTCTTcCct-TCaC---TATA-----TaA-  
AT-----A-----C-GGAA-CC----GGG-A----A-----Cc---A  
-G-Gat-AGT---CA--T--C-----CC-GTT-----AcCtCCT-A-TT-----T  
--CTAtaggcactatgtgt-----CA

>COPIA21-ZM\_LTR

TGactggggttgTTAA-----G--ATA----Tg-----A--Tgct--  
--A--ATCC-Tgataacgcgtgtgttatca-----G--ATAT--A-----  
-----G-----Tc-AGTT-A--Gtaatcctatattttgggac-----  
-----TA-G--ATAcggca----GA-Gt--T-TGT-TcA----  
-----G----C-----AATacataGA-----TCc---Tgtaggtcccatc-----  
-----TTaaaggT-----TGT-T-----A---C-----  
-----TCA-----TGT  
AaAt---CTA-A---Gcatc-----ATTgCTt-TC-C---TATT-----T-A-  
AT-----AgaatcaT-GCGG-CC----TCG-A-----C----A  
-G-A---GGTga-GA--A--C-----GC-TTC-----A---TCA-A-TT-----T  
--CTA-----CA

>COPIA-127\_SB\_LTR

TG-----TTAA-----A--AGG----Gtg-----A--Ta----  
--T--ATCC-Aactcctcattcct-----A---GCTT--G-----  
-----T-----Tc-GGTTg-----  
-----T-----gTA-Gg-ATA-----T-GtccA-TGT---Aca--

-----T-T---T-----TCTg----TT-----TC----Tt-----  
-----TC-----T-----TGT-A-----ttgtagtcc  
acggctgcatggttgcatgccggttagttagggctgcggctcattACT-----TGT  
A-A-----CA-C---Aatcta-----G--GTTGTAcCCt-AC-Cag-TATA-----T-A-  
AC-----A-----T-GTAC-CC----GAGtA----C-----CtatgA  
-G-A---GGT---A--T--C-----TC-GTT-----CcA-TCT-A-CT-----T  
--TCA-----CA

>COPIA-123\_SB\_LTR

TG-----TTAA-----G--ATA---Tcag---A--Ta----  
--T--GTAT-Tgtcctgtaa-----T--GCAT-----  
-----  
-----Tc-GGTT-A--Ggatctagataaggtt-----  
-----GT-TA-G--ATT-----AtGt--T-TGT-T-A----  
-----G-C---C-----TGA-----TA-----TC---Tcatccaaccgaatg-----  
-----CC-----T-----TGT-A-----Ag--Tc-----A-----  
-----AGTt-----TGT  
A-A-----tcGCTATAt-----A---TATA-----TcA-  
AC-----A-----C-GTAC-AC----GTG-AtgagC-----Ca---A  
-G-At--AGG---CA--At-C-----ACgGTT-----CcA-TCT---TCg---T  
--TTA-----CA

>COPIA-134\_SB\_LTR

TG-----TTGA-----A--ATA---Ttt-----A--Tcc---  
--A--GTCC-----A---AGAT--G-----  
-----  
-----Tatacgc-----Aa-GGCT-A--Ggctccgtgtaacaatagaatctaggagg  
ttggtgtaaa-----CT-TG-T--ATTgtaagt---TA-Gg--T-TGT---A----  
-----G-----A-----TAT-----GA-----TC---Taatgttctac-----  
-----TTg---T-----TGT-A-----C-----A-----  
-----AGT-----TGT

A-Ag---CCA-C---Gctagg-----G--GCTCTTcCTa-GCaA---TATA-----T-A-  
AC-----A-----C-GGAG-CC----GTGtAg---C-----Ct---A  
-G-G---AGG---CA--AtaC-----AC-GTT-----A-A-CCC-A-A-----T  
--TTA-----CA

>COPIA-98\_SB\_LTR

TG-----TTAA-----A--CGA---T-----Gc-T-----  
--A--ATCC-Tttcggtag-----G--ATCT--G-----  
-----  
-----G-----T--GTCT-A--G-----  
-----A-Tt-----CA-TT-Gt-ATAggt-----TT-Gga-T-TGT-T--gtac  
aagtagG-T---T-----TGTtga--GA-----TCca--A-----  
-----CCa---A-----TGT-A-----At--Ctgtcc--T-----  
-----TGT-----TGT  
AaAcg--CCA-T---Ggagag-----G--GCTGTT-CTc-TCcC---TATA-----T-A-  
AC-----A-----C-GAAG-CC----GAG-Gac--C-----Ct---G  
-G-Aa--GGG---CA--Ac-C-----TC-GTT-----A-A-CCC-A-Tctcgt-T  
--TTA-----CA

>COPIA-104\_SB\_LTR

TG-----T-AA-----A--ATA---G-----A--T-----  
--A--GACT-----T---GCAT--G-----  
-----  
-----G-----  
-----CA-TG-Ca-AT-----T-----  
-----G-G-----  
-----T-----TGT-A-----A---Ca-----A-----  
-----ACCagacg---TGT  
A-----CCA-A---G-----ATT-----  
-----GAGcT---A-----C---A  
-A-Gtt-AGG---A--A--T-----TA-GTTatt-----AtA-CAT-A-T-----

-----CA

>COPIA-136\_SB\_LTR

TG-----TTAA-----G--ATA----Tgt-----A--Ta-----  
--A--GACT-Ttgagttgtatacgcacatggcttcgt--T---GTAT--G-----  
-----  
-----Taatc-----Ta-GAAT-A--G-----  
-----AcTt-----G--TAcG--ACA-----A-G---T-AGA-T-Acacg  
-----G-G---A-----TCTactc-GA-----TC---Tctta-----  
-----TCag---A-----TGT-A-----AtttCt-----T-----  
-----TCTtga-----TGT  
AcAag--CCA-Cca-Ggg-----G--GCGTTT-CCc-TGaC---TATA-----TaA-  
AC-----A-----C-GGAG-CC---GAG-Gt---A-----Cag--A  
-G-A---TGT---CA--C--C-----TC-GTT-----CtAgTCT-A-T-----T  
--TTA-----CA

>COPIA-54\_SB\_LTR

TG-----TTAG-----A--AGA---Tag-----Ag-Ttg---  
--T--ATCC-----T---ATAT--G-----  
-----  
-----G-----Aa-GCCT-A--G-----  
-----A-Ttactt-GA-TG-T--ATAc-----Ttc-----aTGT---A----  
-----C-T---C-----TAT-----A-----TA-----  
-----gA-----Att-Cc-----T-----  
-----TGT-----TGT  
AcAagg-CCT-T---Gtatg-----Gt-GCGATTgCAc-CC-A---TATA-----T-A-  
ATg-----aGATG-CC---GAGtA---C-----Cct--G  
-A-G---GGG---TA--CggC-----TCcTTTg-----C-C-TCT-A-TTctc--T  
--TTA-----CA

>COPIA27-ZM\_LTR

TG-----TTAG-----Ac-AGAattgTa-----A--Tccc--

--T--ATCC-Tctgg-----T---GCCTcgG-----  
-----  
-----G-----T--GGTT-A--Gttggtagc-----  
-----CA-TA-G--ATA-----GA-Ga-----T-T-A-----  
-----G-G---C-----TATA---GA-----TA---Aagataagcc-----  
-----TCggc--Tg-----TGT-A-----At--C-----ttaaccacc  
tgaaactc-----TATccg-----TGT  
AtAcaccCTT-C---GcccgggtatacG--GCG-----C---TATA-----TaA-  
AC-----A-----T-GCAA-CCT---GCG-Gcca-C-----Ca---A  
tG-Gt--GGTt--GA--A--C-----GC-TTC-----A-T-CCT-A-TTagg--T  
--TTA-----CA

>COPIA-65\_SB\_LTR

TG-----TTAG-----A--ATA---Cc-----Ag-Ta-----  
--T--GTTC-Agcatacgtacatgacaactatggt---T---GTGT--G-----  
-----  
-----T-----Tg-GAGT-At-G-----  
-----AgTcagg--CA-TA-G--ATAcggtttcatGT-G---T-TGT---Atac-  
-----G-A---T-----TAG-----GA-----TA---Tcctc-----  
-----TTg---T-----TGT-A-----At--C-----ctattattg  
taatctcctagattagataacttggtg-----TACaaga---TGT  
A-Aa---CTC-CtttGccaaa-----G--GATATTcCTg-GC-C---TATA-----TaA-  
AC-----A-----T-GGAA-CC---GTG-G---C-----Ctg--A  
-G-A---AGG---TAccA--C-----GC-TTT-----A-A-CCA-A-A-----T  
--TCA-----CA

>COPIA-23\_SB\_LTR

TG-----TTGA-----A--ATA---Tg-----Ag-Ttg---  
--T--GTTT-----G---GTAT--Atcgtggaggca  
aggcacaacacgtcaaggctgtagcgtgacttgaattggttctcaagtaaaccggctc  
catgtatcT-----A--GTCT-Ag-G-----

-----A-Tt-----GT-TG-Ta-ATC-----T-G---T-TGT-A-A-----  
-----A-G---T-----AGTtgtagAT-----TC---Aatc-----  
-----TC-----T-----TGT-Aca---At--Cc-----A-----  
-----ACC-----TGT  
AtAcg--CTA-CctaGg-----G--GCTATTcCTa-GGaC---TATA-----T-A-  
AC-----A-----T-GGAG-CC---GTGaGag--C-----Cg---A  
-A-A---GG---CA--T--C-----AC-GTT-----AaA-CCA-A-TC-----T  
--TTA-----CA

>COPIA-88\_SB\_LTR

TG-----TTAG-----G--AGA---T-----A--T-----  
--A--ATTT-Tacacgagataaacctt-----T---GGTT--G-----  
-----  
-----G-----TgcGGCA-Ag-G-----  
-----AcT-----CC-TA-T--ATT-----A-Gga-T-AGT-T-A-----  
-----AaC---A-----TAG-----AA-----TC-----  
-----T-----T-----TGT-A-----A---T-----ttctaattc  
aggagtcctagcctaaatcacata-----TATc-----TGT  
A-A-----TA-TTg-GTtC---TATA-----TaA-  
AC-----A-----C-GGAC-CCtatgGTG-A---G-----Cc---A  
-A-Gtt-AGG---CA--A--Cca---TA-GTT-----A-CtCCAtA-TT-----C  
--TTT-----CA

>COPIA-116\_SB\_LTR

TG-----TCAA-----AtgAAA---T-----AggTcta--  
--T--GTCT-A-----G---GTTC--G-----  
-----  
-----Gtgta-----Tc-TTCT-A--G-----  
-----A-Tgag---GT-TAaG--ATCc-----TA-G---aTCA-T-A-----  
-----A-C---TaacagaTGT-----AA-----TC---Ttcattag-----  
-----TTg---T-----TGT-A-----A---Ca-----A-----

-----ACTtgtct---TGT  
AtAtg--CCA-Cc--Gccgtgga---G--GCTGTTtCCc-GG-Ct--TATA-----TaA-  
AC-----A-----C-GGAA-CC----GAG-A----G-----Cc---A  
-G-GcaaAGG---CA--T--C-----TC-GTT-----A-A-CTC-A-TC-----T  
--TTA-----CA

>COPIA35-ZM\_LTR

TG-----TTAA-----G--CTA---T-----A--T-----  
--T---TCT-A-----Tg--GCAT--G-----  
-----  
-----TataattatagaTa-GAAT-T--G-----  
-----A-T-----T-TA-G--ATTtcc-----TT-Gta-T-TGT---A----  
-----AcC---A-----AGTcca--TA-----TC-----  
-----TGT-A-----A--Cg-----A-----  
-----TCTgtaact--TGT  
G-Tg---CCA-A---Gttt-----G--GCT-----GG-C---TATA-----T-A-  
ACcatc-----gGCAA-CC----TCC-T---G-----Gg---A  
-G-A---GGT-----A--Ct---GC-TTTctgcatatt-CtCtACT-A-TT-----C  
--TTA-----CA

>RETROFIT2\_LTR

TG-----TTAG-----A--TAA---T-----G--Tt-----  
--A--GT-T-----A---GTTT--G-----  
-----  
-----T-----T---AT-A--G-----  
-----A-----GA-TA-G--ATT-----A-Gtt-C-TGT-T-Act--  
-----G-C---A-----TGTac---TT-----TC---Ttttatctatctctatatcc  
aggattgtcTCagg--T-----TGT-TgagattAgt-Cct-----A-----  
-----TCctt-----TGT  
AcAcg--CCA-C---Ggcaga-----G--GCTCTT-Tct-GT-C---TATA-----TcA-  
AC-----Aaagg--T-GCGG-CC----CCG-T---A-----Ca---G

-G-G---GTT---CA--A--C-----GC-TT-----CTcA-TTccgt-T  
--TTA-----CA

>COPIA28-ZM\_LTR

TG-----TTGG-----Aa-AAA---Tag-----Ag-Tt----  
--T--GTTT-A-----A---GTAT--Gttgcgtaaata  
ttggtttgtttctgacgcacctcttcct-----  
-----G-----A--GGCT-A--G-----  
-----Aa-----GA-TAgGa-ATA-----TA-Gt--T-TGT-T-----  
-----G-----A-----GGT-----GA-----TA-----A-----  
-----Cgc---T-----TGT-A-----A---Cagaa---A-----  
-----TATgt-----TGT  
A-At---CTC-C---G-----GCTTcCTttGC-C---TATA-----TtA-  
AC-----A-----T-GCAA-GC---TCG-G---CagagaacaaatgCt---A  
-G-A---GTT---TA--At-CaaaagGC-TTCcgct-----C-C-TCTgA-TT-----T  
c-TTT-----CA

>COPIA40-PTR\_LTR

TG-----T-AA-----G--CAA---G-----  
--T--ATCC-A-----A---GTAT--Ggaactaactcc  
aactgaacctcct-----  
-----G-----Aa-GAAT-Ag-G-----  
-----A-Tttaa--GC-TA-GtgATA-----A-Gat-T-TGTaT-A----  
-----G-A---A-----TGG-----AAc---TC---Taattattgtgtttga----  
-----TTagaacTc-----TGC-A-----A---Catt---A-----  
-----TCTttat---TGT  
AtA-----TATA-----T-A-  
ACctctgattcaA-----T-GAA-----TAA-A---C-----At---G  
-A-G---TTT---CT--A--C-----GT-TTC-----AcAaTCAgA-TTtcatcT  
--CCA-----CA

>HOPSCOTCH\_LTR



TA-----TTAG-----Ac-AGA----T-----A--T-----  
--A--TTCC-----A---GATT--G-----  
-----  
-----T-----A--ATCT-T--Gatttctttccaactaaccggacgtagat  
agcacagg--A-Tct----CC-TT-G--ATTt-----TT-GgcgC-TGA-T-Atc--  
-----G-C--T-----TGT-----GA-----TAcggcAg-----  
-----CC-----Tc-----TGT-T-----Ag--C-----ctccggtta  
gagtttg-----TACga-----TGT  
A-Acaa-CCT-Cc--Gc-----T--GCT-TTgTCa-GC-C---TATA-----A-At  
AC-----A-----T-ATAC-GC---GGcTg---Ct-----Ca---A  
-G-Ggc-AGTagaGA--A--C-----GC-TT-----CCTaA-TT-----C  
--CTT-----CA

>COPIA1\_ZM\_LTR

TG-----TTAG-----A--AGA----Taag----A--Ttagat  
tgT--AAAC-Aaa-----T---ATAT--Gtaacaacaag  
agtaagcatc-----  
-----Tc-----T--GGGA-A--G-----  
-----A-Taaa---GA-TAgGg-ATA-----TT-Ctg-T-TGT---A----  
-----A-C---T-----AGA-----AT-----TcC---Tgaagcttc-----  
-----TCTagt-T-----TGT-T-----A---Cg-----A-----  
-----TCC-----TGT  
AaAt---CCTgC---Gca-----T--GTTGTT-TAt-GC-C---TATA-----TaA-  
AC-----A-----T-GTAGg-----GCG-G---C-----CctccA  
-AcG---AGG---CAgcA--C-----GC-TTTaacctaataatgcC-C-TCTgA-TT-----T  
--TCA-----CA

>COPIA-126\_SB\_LTR

TG-----TTAG-----A--AGA-----A--Tt-----  
--A--GTCC-----A---GCAC--G-----  
-----

-----T-----T---TGT-A--Ggggctacggttgtagcagttgtaccgtgt  
-----A-T-----A-TG-Ga-ATA-----T-G-----TGT-T-A-----  
-----G-----T-----TGA-----GA-----TA-----Tattaggaata-----  
-----TCaag--A-----TGT-A-----At--Ccc-----A-----  
-----TGcTTtg---TGT  
A-AcctgCCA-C---Gatggg-----G--GCTCTT-CCc-AT-C---TATA-----T-A-  
AC-----A-----C-GCAA-CC-----GAG-Gatc-C-----Ct---A  
-G-G---GGT---A--Ac-C-----TC-GTT-----AaC-CCTaA-AT-----T  
--TCA-----CA

>RETROFIT5\_LTR

TG-----TTAG-----AtcTTA---Tc-----A--T-----  
-----ATCT-TatcattctctgtatggatatgcacggaT---GCAT--G-----  
-----T-----T--GGTTc-----  
-----g-----GA-TA-G--ATA-----GA-G-----GA-T-A-----  
-----GgA--C-----TCT-----AA-----TC-----  
-----Cc---T-----TGT-A-----A---Tt-----Aggatcaccg  
aaccaacacatctgcacgcatata-----TATc-----TGT  
A-Aa---CTC-A---Gc-----Gc---GTT-TTt-GC-A---TATAgtgaaTcA-  
AC-----A-----C-GAAA-CC---CTGcGt---C-----C---A  
c---c--GTG-----A--C-----GC-TTTcctgcat---AcA-CCTgA-GT-----T  
--TTA-----TA

>COPIA-135\_SB\_LTR

TG-----TTAG-----A--AGA---T-----A--Tg-----  
--T--TTCC-T-----A---ACCT--G-----  
-----T-----Ac-GGTT-A--Gctagtctaggctttc-----  
-----CT-TA-Ga-ATAgT-----TA-Gc--T-TGT-T-----  
-----C---T-----TGTag---TA-----TA---Ag-----

-----TTaac--T-----TGT-Atc----A---Ca-----Agatgtaatc  
tcccagatcacggttgatctgatc-----TGT-----TGT  
AcTtg--CCA-Cc--Gtagg-----G--GCTATT-Cct-ACgC---TATA-----T-A-  
AC-----A-----T-GAAG-CC----GAGaGacc-C-----Ca---A  
-A-G---GGT---CA--A--C-----TC-GTT-----CcC-TGT-A-AT-----T  
--TCA-----CA

>hmmcons

TG-----TTAG-----A--ATA---T-----A--T-----  
--T--ATCC-A-----T---GTAT--G-----  
-----  
-----T-----T--GGTT-A--G-----  
-----A-T-----GA-TA-G--ATA-----TA-G---T-TGT-T-A----  
-----G-C---T-----TGT-----TA-----TC---T-----  
-----TC-----T-----TGT-A-----A---C-----A-----  
-----TCT-----TGT  
A-A---CCA-C---G-----G--GCTGTT-CC--GC-C---TATA-----T-A-  
AC-----A-----T-GCAG-CC----GAG-G---C-----C---A  
-G-A---GGT---CA--A--C-----GC-GTT-----A-C-CCT-A-TT-----T  
--TTA-----CA

.....

**Sire\_150**

>SHACOP21\_LTR\_MT

TGTT-AAAtga-----TAA-----  
-----  
-----  
-----  
-----  
-----  
-----

-----  
---T-T---T--GT---A--A-----T-T--T-----  
---Tc-C--A-TAT--Tcc-----TA--G-GT-TCcttaa-TGTA---T---C-AG---  
-----  
-----  
-----Ta--AGttcca-G-AG-AA-----  
---T--GT-CAT---t-TAA---TAtt-----C-----  
-----  
-----CTAG-----G-TGc-----A-TT  
C-Act-TA---TTTActagaactTT-----C-T-A-----TG--Tatc  
aatataactagagg-----  
-----T--T--CTA-----  
-----  
-----  
---T-----GTATTgacaaggcactacaa-----  
-----T-G-AA-Aag---A-----A-----  
-----ACATTac-----Ttt-----CAat--  
-----C-T--A-TAa-----C-----Tt---TcacGT--TT--  
---T-----  
-----  
---C--TG-TT---Cc-----  
-----T---Tttattcctctttct-----  
-----C--CAA  
CA  
>SHACOP8\_LTR\_MT  
TGTT-AAAa-----TTA-----  
-----  
-----  
-----





CA

>COPIA-111\_SB\_LTR

TGTT-AGC-----TAA-----

-----

-----

-----

-----

-----

-----

-----

---G-Taga--T--GC---Ac--G-----A-G--Tc-----

---A--T--T-CAT--G-----TA--A-TC-TTt-----TGTTa--A---A-AGgag

tcttagag-----

-----

-----T---TG-----T-AG-GAaggcatga-----C-C

G-G--T--GG-CGT--Gc-CGG-----gtcatgagtctacttgtgtcggtc

agtttgttgacgccacgacgagtatcgtgcacgcggcgatccttgcagggaaacgaggta

cgcacggtgcccgcctg-----GC-----G-TG-----G-TG

G-A---TC---GG-G-----GC-----G-C-C-----TG--Tgct

cacgatcag-----

-----A---G--T--CTA-----

-----

-----

---T-----TTATA-----

-----T-GcAA-T-----Aaagaggaccgaa-----A-----

-----ACTGCgacg-----TTgggcag-----CAatta

gaac-----C-C--A-AAAt-----CtgtcttcacgaT---T---GT--TC--

-Tc---Ttataaattcgtgttcaggtatcaccgacatcgccg-----

-----







---T-----ATAA-----  
-----T-G-AA-T-----Agagagacaacagaaa-----A-----  
-----GCTGTcgc-----TTg-----CAg-----  
-----  
-----  
-----  
-----  
-----

CA

>COPIA-72\_SB\_LTR

TGTTtGAA-----TAA-----  
-----  
-----  
-----  
-----  
-----  
-----  
-----  
-----  
-----  
-----

---AgTcc---T--GA-----gcT-----  
---T--G--T-TAT--T-----TT--T-AG-TA-----A---G---T-AGaaa  
ctagattagcaggctgtgc-----  
-----

-----Ta--AGta----T-GG-CAtgtcc-----C-A  
G-At-T--GT-TGG--Ga-TGG---CA-----Acaattgctcacgagcatgccgtga  
ttgacacag-----

-----TC-----G-AT-----T-GT  
A-AtttTA---TTTCc-----TT-----G-C-A-----TG--Taac  
-----







----T--C--A-GGTg-T-----CA--T-GG-GActgcggTGCT---G---T-GGctg  
gtttggtcagagggcgcagcagaatTTgaatgaagccgatggcggaacgg-----  
-----  
-----T---TG-----G-CGt-----C-A  
G-G--A--GG-AGTg-Gg-TGG---TG-----Accgcgctcacggcgtcgagcag--  
-----  
-----TTAGca-----G-TG-----T-GT  
G-T---T---TCTGcc-----GTcatgtatc-----G-T-G-----TG--Tgtg  
agtagtt-----  
-----T---T--T--C--attcaacaagtgtgtg  
ttctaggtgtaggtataaatacctggatgtaagaggcatgagttagcacttaagacttgg  
tgtaatcgtgtttga-----  
---T-----TTGAAagttatcaatag-----  
-----T-G-AA-A-----Aagggcactctctccc-----G-----  
-----GTAGTtctccgggcagTTgc-----CAaagt  
gtgcgt-----C-C--A-ATt-----C-----Tcgt-T---GTgaTC--  
-T---Tgcgcaatcttgagtttaggttagccaccgt-----  
-----  
-----G--TG-AT---Ctagcctgtga-----  
-----T---Tgttgattctgag-----  
-----C--TTA

CA

>COPIA-41\_SB\_LTR

TGTT-AGTg-----TAA-----  
-----  
-----  
-----  
-----

-----  
-----  
----G-Ct----T--GA----T--G-----  
-----gGGA--G-----TT--G-AT-GTt-----TGCT---G---G-AGacg  
ctgcagcagctgggtaagcagaagcagcaaatttgaattcaaacaagagggagcgggagc  
agttggctgagtgcagatggtgaccgccccacgttcgtgtctcaacgtcaag-----  
-----C---AG-----T-TG-CA-----c-  
----T--GA-CAT--Cc-TTTtc-TA-----  
-----  
-----TT-----G-TG-----T-AT  
C-T---T---GCTTtc-----GT-----G-T-G-----TG--Tgtc  
agagacttgtttagttg-----  
-----T---T--G--GTA-----  
-----  
-----  
---T-----AAATAgctaagtgtt-----  
-----T-G-GA-G-----Agcgc-----A-----  
-----GTAGCgca-----TTg-----TAagcg  
a-----A-Ct-A-TTtg----Tg-----Tt---T---GT--GC--  
-Tg---Ttcacatatatcagtgcaaagagcactgtcctctgacagttgccagttcgtgt  
ttcttcattgttcatgcgcatccttctctgtaggattagccaattgatcattagcgttg  
tgattG--TG-AT---Cctcgg-----  
-----T---T-----  
-----C--CAT  
CA  
>COPIA50-PTR\_LTR  
TGAT-AGAat-----TAA-----  
-----  
-----







gctcgtgattggtgatccatca-----C--TTA

CA

>COPIA-33\_SB\_LTR

TGTT-AGT-----TAA-----

-----

-----

-----

-----

-----

-----

-----

---G-CctaatT--GC---T---A-----

-----T-GTA--Tc-----TT--A-AT-TTc-----TGCA--T---T-AG---

-----

-----

-----T---AG-----T-AG-CAgtgc-----C-T

----T--GG-CAT--Cc-AAG-----

-----

-----TTTG-----G-AGc-----A-GG

C-A---TC---TTTAc-----TT-----T-T-Gc-----TA--Tagc

atattctggagtaggtgtctgaccaca-----

-----T---T--G--CTA-----

-----

-----

---T-----ATAAGtggcagacccccctccctctattgtatcctggtatcacaagt

ttgat-----T-C-AA-Tcc-----Aagcggccaagggcca-----A-----

-----GCTGCcctctgggca-TTcc-----CAgat-

-----C-C--A-AAt-----C-----TC--

-Ta---T-----

-----  
-----G--AG-TTggg-----  
-----

-----  
-----CAA

CA

>COP12\_LTR\_MT

TGTT-GAC-----TAAttgacctataaaaactttttctga  
atactttattgtttatgttactttattgcttat-----  
-----

-----  
-----  
-----  
-----  
-----  
-----

----G-Tg----T--GT----A--A-----T-T--A-----  
----T--T--T-TAA--C-----TT--G-TT-T-----TGT-----T-AGtaa  
aactatgctgcacaagtaagattatctgcacaagt-----  
-----

-----Ta--AG-----T-AG-G-----T-T  
T-A--T--GT-CAT---a-TA---TAtgac---A-----  
-----

-----TCA-----G-CT-----A-AG  
C-A---TAg--GCTGa-----GTcattactta-----G-T-A-----T--T--  
-----

-----T--G--G--CTA-----  
-----  
-----

---T-----AAGTAtgtaagaaggatgtatggatggta-----  
-----T-G-TA-Tc-----A-----Aattt-----









gac-----  
-----T---AGg-----T-GA-CAg-----T-T  
-----A--GT-CATggGa-TAG----AtgctgcatA-----  
-----  
-----TT-----T-TTc-----T-A-  
C-T---TA---TCTA-----TT-----aT-T-----TG--Ta--  
-----  
-----T--T--T--CTA-----  
-----  
-----  
--T-----TTAAGttgaactcttcttaa-----  
-----T-G-AA-At-----Atatag-----A-----  
-----GTTGCac-----TTc-----CAcgtt  
tgttggtt-----A-C--A-AAg-----C-----Tt---Tag-CT--TCac  
-Tg---Tcacgttttcaatacaaaaacttttagctttgaattagtgcaaaacactta-----  
-----  
-----G--TG-TT-----  
-----  
-----CAA  
CA

>COPIA5-ZM\_LTR

TGTTaGGAaag-----TAA-----  
-----  
-----  
-----  
-----  
-----  
-----



----T-Cct---T--GA----T-----TgG--T-----  
----Gc-T--A-GTT--Ta-----CT--T-AT-TC-----TGTT---T---T-AGgaa  
a-----  
-----T---AGc-----T-AG-TA-----  
----T--GG-TAG-----TGG----A-----Tcagtcttatatggacggatccaat  
cagcaagatcaggactgatagcagtcaggatta-----  
-----TTAC-----CT-----T-GT  
A-A---TA---GCTA-----GT-----T-T-G-----TT--Tcct  
tatgaa-----  
-----A--G--T--CTA-----  
-----  
-----  
---T-----AAATAtatggccttagaggcta-----  
-----A-G-AA-A-----A-----G-----  
-----GCAGTca-----ATaggacgc-----CAc---  
-----C-A--A-ATctg---C-----Tg---T---GT--TC--  
-C---Tctccaaaa-----  
-----  
----G--AG-TT---Cgcgtgctgtgagtcacctgggagg-----  
-----T---Ttttcttatacctgaagaacttacctgggaggtagg  
aactcgccggcaacctgcagggttgtctctccggcgagttt-----C--CAA  
CA

>COPIA-59\_SB\_LTR

TGTT-AGA-----TAA-----  
-----  
-----  
-----  
-----

-----  
-----  
-----  
----G-Cct---T--GC-----gcc-----T-T--Agactta-----  
----G--C--T-GCA--Tg-----TT--T-TT-TCa-----TTCA---G---T-TG---  
-----  
-----  
-----TgcaTGcgcac-G-AG-CA-----C-T  
G-Ac-----T-TGT--Gg-TTG-----ccgtgcgcctaggagaactggccg  
agattagctcgccatgactcgcgacatgcagccacggctccaacgaaagtggcgcgtggg  
gatggacgcgcgcaatgcgctgc-----GTGG-----G-CGccg-----T-GG  
-----CTGg-----GT-----G-T-G-----TT--Tg--  
-----  
-----T---T--T--CTA-----  
-----  
-----  
---T-----ATTTAccgcaatcaaaaac-----  
-----A-G-AA-A-----A-----C-----  
-----GCTGCttg-----TTgttcg-----CAgca-  
-----C-C--A-AAa-----C-----Tcga-Tc--GTg-TC--  
-Caag-Tgttcgcgctgtgtttctctcgcgccgctcgtgcgctcaccgcg-----  
-----  
----G--CG-TT---Caccgcccgttcggt-----  
-----T---T-----  
-----C--CAA  
CA  
>COPIA-131\_SB\_LTR  
TGTT-AGC-----TAA-----  
-----



>CPSC4B\_LTR

TGTT-AGTaa-----TAA-----

-----

-----

-----

-----

-----

-----

-----

---G-Tc---Ta-GC-----T-G--Ctcagagtagttagtttccc

tctgT--T--T-TTAc-G-----TT--G-AG-TCt-----TGCAC--A---TgATctg

ttcatcctgtttgtgtgcatagtggttgacgcacgctgcgttcgtgcggagtcctggtg

tgtcgtgcgtggtgtgctccagttcgtgggatgacgcga-----

-----AG-----T-GG-CA-----

-----A--GG-AGT--G--TGG---CAcgcaca--A-----

-----

-----TTAG-----G-AGgccac-----T-AT

G-Gcc-AC---GTTTaac-----TT-----T-C-T-----TG--Taat

-----

-----T--T--G--CTA-----

-----

-----

---T-----TTAAGgттаagc-----

-----T-C-TA-AtccagaaA-----A-----

-----GCTGCcag-----TT-----

-----A-ATg-----Cag-----

-----

-----

-----

-----  
-----CGC

CA

>COPIA11-ZM\_LTR

TGTA-GAAag-----TAA-----  
-----  
-----  
-----  
-----  
-----  
-----  
-----  
-----  
-----  
-----

---T-Cct---Tg-GA---T---Gcca-----T-G--T-----  
---T--T--A-GCA--G-----TT--T-A--Tct-----TG-A---T---T-AGctt  
aat-----

-----T---AG-----G-TG-TAtga-----T-T  
G-G--A--AT-AAG--G--CTG----A-----Ttgagagccgttat-----

-----TTAG-----T-TTcct-----T-AT  
T-AcagTA---GTTcct-----TT-----C-C-A-----TG--Taat

-----A---G--T--CTA-----

---T-----ATAAAccaagagatatcaa-----

-----T-G-AA-A-----A-----A-----

-----GCAGTcac-----TCgacag-----CAc---

-----C-A--A-AAa-----Taaga-----Tcg--T---GT--CCa-













ctagttgtagctgagattactatctagattaggatatggttttaattccttttgtaagt  
ttatctaggattaaactaacttgtaaacatctccttaaaa-----  
-----T---AA-----AG-GA-----  
G-A--A--GT-TGG--C--TGG---TAcgtt----T-----  
-----  
-----CTA-----G-AGt-----T-TG  
T-T---TC---TCTTt-----GTaa-----T-T-C-----TG--Tttt  
ctt-----  
-----T---T--C--CTA-----  
-----  
-----  
---T-----AAATAaaagggcatgggatggt-----  
-----A-G-TA-Acc-----A-----Actactca  
at-----TCTGCtc-----TtTggtcctta-----TActt-  
-----A-A--A-TActaagttC-----Tg---T---GT--TC--  
-T---Ttcttttggtcctttccatcgtggacttagttccttggtcctttctctttatc  
agcaacataagg-----  
-----C--AG-TT---Ctttatat-----  
-----T---T-----  
-----C--TA-

CA

>COPIA-29\_SB\_LTR

TGTT-GGAgcagagctcgtcg-----TAA-----  
-----  
-----  
-----  
-----  
-----

-----  
----T-Cg----T--GTc---A--A-----A-G--Tgcatatt-----  
----TccT--T-TGA--T-----TA--G-AT-GCat----TGTA---A--T-AGttc  
aattaagttgtgaacatt-----  
-----  
-----T---TGtt----T-AG-CAC-----G-T  
A-G--A--AT-CACg-Gg-TTG-----  
-----  
-----AG-----G-CG-----G-AG  
-----A---CTTGcac----GTc-----T-C-Gacgc---TG--Tgac  
cg-----  
-----T---G--C--C--cagataggttcacccc  
gccacggcgcgcatgccgtgcttgctgcggtggacgtccgcaaatagacggcgatatctcgca  
gctgccaaccgtggcggggatctcggatcgagccata-----  
---T-----ATATAtcaagtttgt-----  
-----T-G-CA-Tctggta-A-----G-----  
-----GTTGCgcca-----ATcgcggc-----TAaa--  
-----C-Ct-A-ATcg----C-----Tg---T---GTc-TCg-  
-Tg---Ttctctctcgtcctc-----  
-----  
----G--TG-TT---Cgtg-----  
-----T---Tcctgtggtgaccgcgaccgagcatcgacggtgcc  
ggcacgttccaagctccggcgagccgcccggac-----C--TTA  
CA

>COPIA-85\_SB\_LTR

TGTT-AGC-----TAA-----  
-----  
-----  
-----

-----  
-----  
-----  
-----  
----A-T-----T--GA----T---Gcagagtct-T-G--Taatctttc-----  
----G--T--T-TCA--G-----TT--G-AG-TTa-----TGTA--A---T-AGtcg  
g-----  
-----  
-----Ta--AGgggct-G-TG-CAtga-----T-T  
G-G--T--GT-TGT--Gc-CTG----A-----Tcatgacacagcttagaagagtcgg  
tcgtgtccgcgcatggtgtgccgagcgcacatgagacgtgcactg-----  
-----CTAGgaaacg-G-TG-----T-AG  
C-G---TA---CTCG-----ATatg-----G-C-A-----TG--Gcgc  
gggacgggctcagttgggcctgctg-----  
-----T---Gt-T--CTA-----  
-----  
-----  
---T-----ATAAAca-----  
-----T-G-AA-T-----Aaagaccgagg-----G-----  
-----GCTGCaatg-----TTgg-----CAgcgc  
cg-----C-A--A-TAt-----C-----T---T---GTc-TT--  
-C----Tcacgtgaacttgttttcacctaacttagatctcgccgcggtcaccacggtggt  
gtgcagcgcagttcca-----  
-----G--AG-TT--Cctgatga-----  
-----T---Tcttggt-----  
-----C--CAA  
CA  
>COPIA-25\_SB\_LTR  
TGTTgGGC-----TAA-----



CA

>COPIA9-PTR\_LTR

TGTT-GAA-----TTA-----

-----

-----

-----

-----

-----

-----

-----

---T-Cat---Ta-GT-----T-T--Taaagtttccctg-----

---T--T--T-TAA--G-----CC--T-AT-TTc-----TGTT---A---T-GTtga

ataattcctccttgtcttgaggaacaagattgttttttctgttacagtagccatgtacca

cga-----

-----T---TA-----T-AG-GAt-----T-T

T-A--A--AT-CGTt-Gg-TTG-----

-----

-----TTAT-----T-CT-----T-TT

C-T---TC---TTCCa-----GT-----G-T-A-----

-----

-----A--G--G--CTA-----

-----

-----

---T-----TTAA-----

-----TA-Gcc-----Acatc-----A-----

-----GTTGcttaa-----TT-----

-----At-A-TTgaa---C-----T---T---CT--TC--

-Ca---Tctcttgtgtaatcaaacctgtcaaagctctcaaagctcttta-----

-----

-----C--TT-TT---Cttta-----  
-----T---T-----  
-----C--TA-

CA

>COPIA-138\_SB\_LTR

TGTT-AATag-----TAA-----

----G-Ccg---T--GA-----gc-----T-G--Tac-----

----T--T--T-CCT--G-----TT--T-TG-TAcc----TTC-----c--T-ATtct

actgctagtgctaacggcatggcccaggagttgggatggcaacccccaatcacgagcat

gccttataggctcttgccctttata-----

-----T---TG-----T-TG-C-----C-T

A-G--T--TT-AGT--Ga-TTG----G-----C-----

-----TTA-----T-TGcct-----T-AG

--A---TA---GCT-----A-----TG--Ta--

-----A---TcaG--CTA-----

---T-----ATATAgtgaac-----

-----T-G-TA-Ttc----Agaggaat-----A-----

-----GCTGCctcac-----TGcac-----CA-----





---T-----ATAAAccagtccaa-----  
-----T-GCAA-Tgg-----Aacc-----A-----  
-----GCAGCaag-----Ttcattgc-----CA-----  
-----CtC--A-TT-----Cag-----T----TccaGT--TT--  
-Tag--Ttcaagtctgaaactgtgtgtgtgctgtgtgtgtgtgcagtagtagctcagggc  
ttttcttctaccttgagcaggggagaggggagaggggaggagagcaggtg-----  
-----C--TG-CT---Cacctcgggtgcagga-----  
-----T---Tgctgtg-----  
-----C--CAA

CA

>COPIA-112\_SB\_LTR

TGTTtGAA-----TAA-----  
-----  
-----  
-----  
-----  
-----  
-----  
-----  
-----  
-----  
-----  
-----GtCct---T--GA-----gca-----  
-----T--C--T--AA--T-----TA--T-AG-AA-----TGTA---G---A-GGcgc  
ctaacgccattagaggcaggccacaga-----  
-----  
-----T---TG-----cGG-CAtggcc-----C-A  
G-G--T--GGtTGG--Ga-TGG---CA-----Accactgatcacgagtatgccggga  
-----  
-----TTAG-----C-AGg-----TcAT  
T-T---TA---TTTCctt-----GTaacaca-----T-C-A-----TG--Tat-







-----T-GCAcCT-----AA--G-AG-TCc-----TGTA---A---T-CTttc  
at-----  
-----  
-----Tc--AGt-----T-AG-CGt-----T-T  
G-G--A--GT-CGT--Gt-AAG-----  
-----  
-----AGg-----G-AGac-----T-GG  
-----GTTG-----GT-----G-TcG-----TG--Cccg  
accctgctcacctcggagtc-----  
-----T---G--T--C--gtgaacacgccatggc  
aagttaggcgcacggggcgtgcgccaccggatatcggcgtcgcgcacccactcgtcatggc  
gtgggagtcttgtaaaacaagcac-----  
---T-----ATAAAtaaagagg-----  
-----A-G-AA-Gggtcgt-A-----Aaac-----  
-----GCTGCggga-----TTg-----CAg---  
-----C-A--AcAA-----C-----T---T---GTtgTC--  
-Ta---Ttgcattcacttgatttcagtttacatctactcgccggttcgtggtcaccacga  
cgccggacatagtcgacgttccctgcgttccggc-----  
-----G--TG-AT---Ctcgacgttccctg-----  
-----T---T-----  
-----C--CAA

CA

>COPIA-57\_SB\_LTR

TGTT-AGCcta-----TAA-----  
-----  
-----  
-----  
-----

-----  
-----  
----G-Tgt---T--GC----A--A-----TcG--Aac-----  
----T--C--T-GTAa-Tc-----AT--G-TG-TT-----AG-A--T---C-AGggt  
gtcatgctagaggaatcctagtatggt-----  
-----  
-----T---AGag---T-TA-GAtgtag-----C-C  
A-A--A--GA-CAT--Gc-TTGgg-TAcgtcaag-C-----  
-----  
-----TT-----G-AG-----T-CG  
G-Ag--TC---TGTAtct----GTcacgtcgtg-----G-C-G-----TG--Tcag  
gcgcatgtaacagggatcgcaaggaaatagtgctctgttcctatgacacggcgtggga  
gcctca-----T---G--G--CTA-----  
-----  
-----  
---T-----ATATA-----  
-----T-C-AA-At-----Aaagatatcatgagg-----G-----  
-----GCTGCgg-----TTagg-----CAgtaa  
-----A-C--A-TA-----T-----Ta---C---GT--TTg-  
-Cc---T-----  
-----  
-----G--AG-TT---Tcga-----  
-----T---Tctctagtttcaatctggtatgtggtgatcgcagtc  
tccacgtcgccagcgagaacgacattctacgacgtttcagcgtcaatctgat--C--CAA  
CA  
>SHACOP4\_LTR\_MT  
TGTTgAGAcattgagatttcagatgtacacaatagTAT-----  
-----  
-----















tc-----  
-----A--Ta-T--GTA-----  
-----  
-----  
---T-----AAATAgca-----  
-----T-G-AA-T-----Aaaggaccgtga-----A-----  
-----GCTGCgacaa-----TtTgg-----CAgcg-  
-----C-C--A-TAatc---C-----Cg---T--GT--TC--  
-Ttc--T-----  
-----  
----C--TG-TT---Ttg-----  
-----T---Ttcatctacattcgctctcgccgcggtcaccacgaa  
cacgccggcgtcgagactacggaccaagggcatcgctcggtt-----C--CAA  
CA

>COPIA4-SB\_LTR

TG-----actgtcaagggtgacttgggtgca  
taggaaaagtacttcaggcatcatattctaccttggatcaaatttgggtgacctgggcttc  
acagaaacaaaggggtcgtggctctatcttcttgtgaagctgagtacatagctgcagcatt  
gggagcctgtcagggagtgtggctcagtcggctgatagaggagaagttcagaaattcaga  
cttctcatcgataaccagtcctgctatcgagctagccaagaaccagtgtttcatgatcgc  
agtaagcacattgatacacgggatcattacattcgtgactgcattgagaagaacgtcctg  
gatgtggaccatgtaagaacagacgagcaggttgctgacattctgacgaagcccttgggg  
agaatgaagtttgcggaattcagagtcagctcggcgtcgttctagttcgtcaggattag  
gggg-----T--GA---T---T-----T-G--Tta-----  
----G--C--T-TTAgcT-----TT--G-TG-TTtca---TTCAt--G---T-AA---  
-----  
-----Tcc-TG-----Tc-G-AAgttt-----T-A  
T-G--T--AA-CGTa-Gt-TGG-----



-----  
-----Tg--TG-----G-TG-CCcgtgtgcg-----T-A  
G-G--A--GG-TAG-----TGG----A-----Cgagattagctcgccatgaacctga  
gcatgcaagccatggccggctgttacggcgcacatggggatggacgtgacgcatc-----  
-----CT-----G-CG-----T---  
G-A---TC---G-TGcggcc---GTg-----G-C-T-----TG--Tgct  
gctctgctttgtaa-----  
-----T---T--C--CAA-----  
-----  
-----  
---T-----AAATAagagtcgaatacatt-----  
-----A-G-AA-A-----A-----C-----  
-----GCTGCcgcga-----Ttgcagca-----CAa---  
-----A-A--A-AAct-----C-----Tg---T---GT--TC--  
-Cag--Tgttcgtgt-----  
-----  
----G--TG-TT---Cttg-----  
-----T---Tccctcacctctgctcgtgtcctcgccgccggtgtg  
caccgacgtccggtga-----C--TGA  
CA

>COPIA-105\_SB\_LTR

TGTT-AGC-----TAA-----  
-----  
-----  
-----  
-----  
-----  
-----  
-----



----A-C-----T--GT----T---Gcgtca----T-G--Taa-----  
----T--T--T-GAA--Tag-----TT--A-AG-TTca----TTGAgtcG---T-AG---  
-----  
-----Tc--AGggt---T-AG-CA-----  
G-G--T--AG-CGG--G--TGGc--CA-----Aaggcacgcttggtccacgacacag  
C-----  
-----CTAG-----G-AGgtc-----G-AG  
A-G---TC---CGCGcc-----AT-----G-CcA-----TG--Ta--  
-----  
-----T---T--G--C--agcgcgtagcgtacgt  
tgcgaggaacgatgtatcgcgcgataagcagtatggcgcggggagactcggagcctggt  
ccgagatctctaggagtccctaa-----  
---T-----AAAA-----  
-----G-G-AA-Ag-----Acatgatgctttgcgg-----G-----  
-----GTTGCg-----ATacgg-----CAg---  
-----C-C--A-AAat---C-----Tcg--T---GT--GT--  
-Tgg--Ttgttttgtgtttccatctatctcgttttcgtctcaccgcggtgatcgcgatc  
accgtcacaccaccattggcgcagcac-----  
----G--AG-TT---Ccagggcatcgcctgg-----  
-----T---T-----  
-----C--TAA

CA

>COPIA-107\_SB\_LTR

TGTT-GATttgcatcctg-----TAA-----

-----  
-----  
-----  
----T-Cg----T--GTca--T---Act-----T-G--Ta-----  
----T--C--T-GCA--T-----CT--T-AG-T-----TGCA---T---T-AGct-  
-----  
-----  
-----T--AGt-----T-TGtCA-----  
-----G-CAT--G--TT---TA-----A-----  
-----  
-----TAT-----G-CG-----T-AG  
A-A---T---TCTGg-----GT-----G-TcA-----TG--Gtga  
-----  
-----T---T--G--C--acacgtgagcacgccg  
gaaccgcagattgtaatcctccccgtcatagctggtgggccgtgcatgtcgcacatgggtga  
cccaaatgaggcacaccgtgcagccgctatgtgtgacggggaagaggcc-----  
---T-----ATATAa-----  
-----G-G-AA-At-----Aagattgcatcgtttaa-----G-----  
-----GCTGCgca-----TTg-----CAgttg  
aa-----A-C--A-AAtc-----C-----C-----GTc-TC--  
-Tc---Tcgcgtttctctgtttccatagtttgtagggtttaactcgccgcggtcaccac  
cagccggtgccgcgacgtcgccgggctcaatccgc-----  
----G--AG-CT---Cgg-----  
-----T---T-----  
-----C--CAA  
CA  
>COPIA-74\_SB\_LTR  
TGTT-AGC-----TAA-----  
-----





-----T---Ctaacaaaccgaaacgcaaagtgagagagagttcgt  
cggccaagccgatcgccgtcgtgcttgccattcaggcagccggcg-----C--CAA  
CA

>COP20\_LTR\_MT

TGTT-AGAAat-----TAA-----

-----  
-----  
-----  
-----  
-----  
-----  
-----

---AtCa---A--GA---A---A-----T-A--Tctagaagagt-----  
---A--T--A-GAA--Gc-----TTg-G-AG-TTa-----TTCT---T---T-TTcat  
taagagttaaaaatatctatat-----

-----Ta--TG-----T-AG-CAccac-----C-T  
A-G--A--AT-AAT--C--TTG---TA-----Accaaaagaataatctagtgctgat  
tgtacaccacctctataggaataatctagcaccat-----

-----CCA-----T-AGc-----T-AG  
A-Aa--AA---TCTA-----GTAaccgaca-----T-T-A-----AG--Ttta  
ag-----

-----A---G--C--CTA-----

-----  
-----  
---T-----AAAAGgcacatgcttgtagcatat-----  
-----T-G-AA-Tcatca--A-----G-----  
-----TCTTCgacaataaaa-TTagtggtgtgtt-----CAa---  
-----AgA--A-ATt-----Ctcca-----T---T---GT--TC--

-Tc---Ttagttattactttgt-----  
-----  
-----G--AG-TT---Tgtgtcccactgatatcaaa-----  
-----T---T-----  
-----ggTAT

CA

>COPIA-36\_SB\_LTR

TGTC-TAA-----TAA-----  
-----  
-----  
-----  
-----  
-----  
-----  
-----  
-----  
-----  
-----T-Ctt---T--GT-----T-C--Ta-----  
-----G--T--A-GAA--G-----TC--G-AG-TCg-----GGT-----T-AGggg  
tggacatgaacttaggcgtgcaaggatcatgatcacccgagtcggtttaggactctcgcca  
tggcgtgc-----  
-----Tc--AGcgcac-G-TG-GCg-----C-A  
-----T--GT-CGA--G--TTG---TA-----A-----  
-----  
-----TC-G-----G-TG-----T-GG  
Gc---AC---TTTGtat----GTcatg-----G-C-G-----TG--Gggg  
gcttggactcaagcccagacc-----  
-----T--G--CTA-----  
-----  
-----  
-----T-----AAAAGcaa-----

-----G-G-AA-T-----Aaacgatcatatg-----G-----  
-----GCTGCgg-----TTgcfg-----CAgta-  
-----A-C--A-ATag-----C-----C---T---GT--TC--  
-T---Tcatctcgtcgacttgctcttc-----  
-----  
-----G--TG-TT---Caa-----  
-----T---Tctcgccgcggtgaccacgcactcgccggcgctcgt  
tcctggcgcggttgaggcggttctgct-----C--CAA  
CA

>SHACOP18\_LTR\_MT

TGTT-AAT-----TA-ttgcttttgactgcattacgt  
ggctgatttatctttattccctat-----  
-----  
-----  
-----  
-----  
-----  
-----  
-----  
-----  
-----  
-----T--GT-----T-T--Cagt-----  
----T--T--T-TTA--T-----TT--T-AG-TCa-----A---T---A-AGtgg  
tacctacactt-----  
-----  
-----T--AG-----G-AG-AAag-----C-A  
G-T--T--GT-TGT-----TA-----Tcccacgatcctagt-----  
-----  
-----TTA-----G-TG-----G-TG  
A-Tg--TA---GTTGt-----GTtctg-----T-T-T-----TG--T---  
-----  
-----T--T--T-----gtgaaacac-----

-----  
-----  
---T-----ATTAAgtgtattgtttag-----  
-----T-G-AA-Att-----A-----Ataat--  
-----Caa-----Ttcc-----CAtt--  
-----C-C--A-TTt-----Caacg-----Tat--T---CT--TC--  
-Cc---Tgtctatcatatta-----  
-----  
----T--TT-TT---Ca-----  
-----T---Ttataccatataa-----  
-----C--CAA

CA

>COPIA-20\_SB\_LTR

TGTT-AGTa-----TAAgcctgatgtggtcccaactgga  
ggacacactgtggtgaagctggagaagcgaaggctgcagtggatttcaaaggagcggt  
ggcgggaacggttgctggacggggtggagcggggtgaccgcgaccacgacggttgtctcc  
gtctgatagtgtgttttagccaacttgta-----  
-----  
-----  
-----  
-----  
-----  
----T-C-----T--GT-----G-----T-T--Ta-----  
----T--T--T-GAA--T-----TT--G-AA-TTa-----TGT-----A-AGcgc  
gtgtgtagtgactggtataag-----  
-----  
-----T---TG-----cTG-GAtg-----T-A  
A-G--A--GG-TGT--G--TG-----  
-----  
-----TTAGc-----G-CT-----T-TG





A-G--A--GT-CAT--Aa-CTA-----  
-----  
-----TTAGtattgaaG-AG-----T-TG  
C-A---T-----CTA-----TTa-----G-T-A-----TT--Gaag  
agtcacaactattaa-----  
-----T--G--T--CTA-----  
-----  
-----ATAT-----  
-----T-G-TA-Tg-----Aatctcataatgaaa-----A-----  
-----AGTGTg-----AGag-----TA-----  
-----C-C--A-TTtt-----Ca-----Ta---T---GTa-TTg-  
-Ta---Ttctaccaaattagagagtggtgcaacctaaatc-----  
-----  
-----C--TT-TT---Caattctattctctatttctgccaat-----  
-----T---T-----  
-----C--CAA

CA

>COPIA-32\_SB\_LTR

TGTA-GGCctc-----TAA-----  
-----  
-----  
-----  
-----  
-----  
-----  
-----  
-----T-Tgt---T--GC---A---Gg-----A-G--Tctagtaagtttc-----  
-----G--T--A-TTA--G-----TA--G-AG-TCcag---GGTA---T---T-TGgtg

a-----  
-----  
-----T---AGatcg--T-AG-----C-T  
G-A--A--GT-CAT--Gc-TTG-----  
-----  
-----G-AT-----A-CG  
G-Tg--TA---TTGGa-----GTcggg-----G-T-C-----TG--Taaa  
caccacgtcg-----  
-----T---G--C--C--gtccatggcgcatgag  
acgcgcgtcgcagggaaacggcgtagcgtaccaggtctgtacgacgtgggaggggagtct  
catgag-----  
---T-----ATAAAatact-----  
-----T-G-AA-T-----Aagatgtcatgag-----G-----  
-----GCTGCgg-----TTggg-----CAgca-  
-----A-C--A-TAat-----Ctctcttgcc--Tg---T---GT--TC--  
-T---T-----  
-----  
-----G--TT-TT---Cttctag-----  
-----T---Tttcaatctactcgctggtagtcacgatcaccgcga  
cgccgacgcgttctgcgttcgctcgttccaatctgatcagtcgtgatcaggct--C--CAA  
CA

>COPIA-87\_SB\_LTR

TGTT-GCA-----CAA-----  
-----  
-----  
-----  
-----  
-----  
-----

-----  
----G-Tt----Ta-GT-----T-T--Cctag-----  
----T--T--T-GAT--T-----TA--T-AA-TA-----TGCA---T---T-AGcta  
ttgta-----  
-----  
-----T---AG-----GG-CAga-----T-C  
G----A--GT-CTTa-Gg-TG----TA-----Caagaactcggtcaggctctagagt  
ccggtctgtccgcgtcacgcgcgcacggcgtacatggcgttcccgctgagcaacggtgt  
aacgcacctgttcgggtgacgcggagtcggaTC-----G-TG-----T-TG  
-----A---TCCAgt-----GT-----C-T-A-----TA--Ttt-  
-----  
-----A---G--GcaCTA-----  
-----  
-----  
---T-----AAATAca-----  
-----T-G-AA-T-----Aaaggaccaggca-----A-----  
-----GCTGCacg-----TTttgg-----CAgcg-  
-----A-C--A-AT-----C-----Tc---T---GTc-TT--  
-C---Tcgcgagtttttacggttctagc-----  
-----  
-----C--AG-TT---Cacg-----  
-----T---Tctcgccgcgatcaccgcgtcgacgacttcgccgctc  
gtcgtgcccaccgctcgctggttctagct-----C--CAA  
CA  
>COPIA-49\_SB\_LTR  
TGTTaAGT-----TAA-----  
-----  
-----  
-----

-----  
-----  
-----  
-----  
----G-Tc----T-----T-T--Ttcattcctaggtgcatgag  
tcaaG--T--T-GTAa-Tccag---TT---AT-TAgc---TGCA---T---T-AGtta  
agatttagcgcg-----  
-----  
-----T---AGaacct-G-AG-GAttgg-----T-T  
A-G--A--GA-TAT--Gc-CTA---Accatc---T-----  
-----  
-----TTAG-----G-C-----CG  
C-G---TA---TCTAgg-----GT-----G-T-G-----TG--T---  
-----  
-----G---G--T--C--accgccatcgcacggtt  
cgtggtgcatgtcgtacaggccaagaaggatctgtacaacgattgtgtggtggcggggg  
acgggctccaagcccatgtatccatgtg-----  
---T-----ATATAaagcatga-----  
-----A-G-AA-A-----Accctgaaa-----A-----  
-----GCTGCggctg-----TTgag-----CAgcg-  
-----A-A--A-ATa-----T-----Cg---T---GTc-TCg-  
-T----Tccaatctaactgtgtgctgctggtattcctggtcatcgtgtaggcacgcc  
gccggc-----  
-----G--CG-TT---Ccaggagctagcaggccg-----  
-----T---Ccagct-----  
-----C--CAA  
CA  
>COPIA-97\_SB\_LTR  
TGTA-GCCg-----TAA-----



CA

>GMCOP1A11\_LTR

TGTT-GAAata-----TAA-----

-----

-----

-----

-----

-----

-----

-----

---A-Ct---T--GA-----T-T--Tgggcctaaat-----

---T--A--A-TTA--T-----TT--G-GT-TCct---TGGAc--T---T-AGtta

ttttgggcttaagtaattatgggtcatgtttc-----

-----

-----T---AG-----AG-AAtt-----C-T

-----T--GT-AGT--Gt-TTG---G-----Agtgtctagatatttcttatggttk

taatattctctagaataactctttggatct-----

-----CTAGa-----G-TT-----G-AG

A-Ac--TC---TCTAgaa-----TTa-----G-T-G-----TG--Tcta

gagttctccttag-----

-----A---G--Ta-GTA-----

-----

-----

---T-----AAATAgaga-----

-----T-G-TA-Atcct---Acac-----A-----

-----TTGTa-----TCaag-----CA-----

-----A-A--A-ATa-----Caaa-----GT--TC--

-Tc---Tcctccataaagaattctccttcctatcaagtttctattcaaagtctccaatat

tcctaaaca-----

-----C--TT-TT---Cctaaacataaaaagccttat-----

-----T---T-----

-----C--CAA

CA

>COPIA-11\_SB\_LTR

TGTA-GAAgt-----TAA-----

-----

-----

-----

-----

-----

-----

-----

-----GtCc---T--GctcccA---G-----T-T--Atcacttagttatctgt---

---G--C--T-TAA--T-----TA--T-GT-TTc-----TGC-----T-AT---

-----

-----

-----Ta--AGgcc---T-TG-GGcagca-----C-A

A-G--T--GAcTGT--Gc-AAG---TA-----C-----

-----

-----CCAG-----G-C-----AG

--T---TA---GCTGt-----TTa-----G-T-Taa-----TG--Ctct

aatg-----

-----A---G--C--C--atcaatgtaatcaatg

tgctacttatctcc-----

-----

-----

---T-----ATATA-----

-----T-G-AA-Ag-----Agcagtcgcat-----G-----

-----GGTGTg-----TTatcc-----CAggct







-----T--TcaT--GTA-----  
-----  
-----  
---T-----AAATAggtacctaagtggatgctattctgtgtggaaagagaggaaag  
aaacactagaaA-G-AA-Agagag--A-----G-----  
-----GGAGTgta-----TT-----  
-----C--A-AAg-----C-----Ttt--T--GT--TTaa  
-Tc---Tttgtaagctttttattgttgaaataaaacagt-----  
-----  
-----G--TG-TT---Ttataccctctgaatgtttcaaagccaccaccagtggttc---  
-----T---C-----  
-----C--CAC  
CA

>COPIA-94\_SB\_LTR

TGTT-AGC-----TAA-----  
-----  
-----  
-----  
-----  
-----  
-----  
-----  
-----  
-----  
-----  
-----A-Tc---T--GT-----T-T--Tagataagtttg-----  
-----T--T--T-GGA--Tctcg---TA--G-AG-TCc-----AGT-c--G--A-GT---  
-----  
-----  
-----T---AGgagatcG-AG-CAttc-----C-T  
G-A--A--GG-CAT--Gc-TTG-----gggacgactcaa-----  
-----





----T--T--T-TCA--G-----TT--GcAT-TTt-----TTTAac-T---T-AGcca  
ttgcattttgtaa-----  
-----  
-----T---AGca----T-TG-GAttc-----C-T  
G-G--T--TG-CATgcGc-TGGc--TG-----Aagattagcaaactcgg-----  
-----  
-----TTA-----G-TGt-----T-AG  
T-Ta--TC---GTTT-----TT-----C-C-G-----TT--T---  
-----  
-----T---T--T--C--ggtagtagaagagatc  
gagcagggatcggatcgtgggatggcacggtcagtcgttgatccggcaagatcgcgcatg  
taacagactcttttgtggaggtgaa-----  
---T-----AAAAGga-----  
-----A-G-AA-A-----Aaccccagaaa-----A-----  
-----GCTGCgaag-----TTttt-----CAgca-  
-----C-C--A-AAa-----C-----Tc---T---GT--TT--  
-T----Tgctctgtttttctatggtgctcgtattttcgtcagatactgttcacgttctga  
actactcagacaagctaggatagccacaatctcgcgt-----  
-----G--TG-TT---Cagagtg-----  
-----T---Tctag-----  
-----C--TAA

CA

>hmmcons

TGTT-AGA-----TAA-----  
-----  
-----  
-----  
-----

-----  
-----  
---T-C---T--GT---T--G-----T-T--T-----  
---T--T--T-GTA--T-----TT--T-AG-TC-----TGTA---T---T-AG---  
-----  
-----  
-----T--AG-----T-TG-CA-----C-T  
G-G--A--GT-CAT--G--TTG---TA-----A-----  
-----  
-----TTAG-----G-TG-----T-AG  
T-A---TC---GCTG-----GT-----G-T-G-----TG--T---  
-----  
-----T--T--T--CTA-----  
-----  
-----  
---T-----ATATA-----  
-----T-G-AA-A-----A-----A-----  
-----GCTGC-----TT-----CA---  
-----A-C--A-AA-----C-----T---T---GT--TC---  
-T---T-----  
-----  
-----G--TG-TT--C-----  
-----T--T-----  
-----C--CAA

CA

.....

**Sushi\_150**

>GYPSY70\_LTR\_DR

TGTCAG-A--a-C-----Ccgg----G-----TTTgaa-----  
-----C---T---T---TGccc--TcTTTc-T-TTT-Ctgacagcgttttctatctt  
tccttactgacaacattctaatttgctctccaaattgctgtgtaactttactcagctgatc  
gtcttttacaattagtagcctcaca-----  
-----  
-----  
-----  
-----TG-----TTa-CTg-C-CAGcTGCCTT-----TCATttct  
gctaattgctgctc----CT-A---TAT-----CT---GAgggtgTTTCGct-T-C-  
---TcCtT-TTG-TC-A-GAgTggttgatttcttacagccttcttgctcggctctggtgat  
tatcattgtggttctctgtccagttcctggatccatcccggatttggctgcctactgg  
agagctgatcttttgcgttgcctttgcccttctcctgcattaccaggcctggacaaaaa  
ctaactttatTTTTtgattgaaatttagcccactcctgatttt-----  
-----  
-----  
-----  
-----TCTT--TTtc  
atgtggtgctactaat-----T--T-TG-T-----T--Gg-TA--T-  
--T-T--TT-----CCTgtactggtgaacattgcctgtggtccagttttcagtt  
tatttttactaaagttcaagatctgctctgggatctcagcaagcgctgagtcactttc-  
-----  
-----  
-----  
-----  
-----T-T--T--T-T-Gct-----  
-----T---ACTT-T-----AT---TAaaaaaccct  
a-----T---Tga-ATTGA-Ac--TC--C  
Tctg-----CTTTT--Gg--G--T-----



-Cctttatacagacaca-----  
-----C-----

CTGACA

>GYPSY72\_LTR\_DR

TGTCAG-GaCa-C-----Tggctt--G-----ATC-----  
-----T---TtctcT--TCtacc-TcTTCc-T-GCT-Tttcattccttgacgctgca  
ctcagctgatcattattacgaatcagtgcgcacacggcttgctgcacctgttactggctct  
ctgttaatttccttgctatattaagctctccttttcccactttctggctcgctagtgtgtcc  
tgtcattattcaggctatctcgctgcggttatct-----

-----TG---A---TTc-CTg-T-CA-tTGTCAT-----GCATtact  
tcatgttctgatt-----CT-G---TTT--Tt-----CT---CTt-----CTGCCC--A-G-  
---T-T-T-TTGcTC-G-GT-T-----

-----GCCT--GTgt  
-----T--T-TT-Tc-----T--G--TT--T-  
--C-A--TT-Ttgat---TCTccccggccagccacctaccttcgacttcgctgtccg  
acgctgaacttgactttcctccgttatcccatctgcctcccgatcgatgcttgctgcct  
gacctctctcacgcccgctgatttgacactggtgcccaggttgccctttcgctcccaccga  
gcga-----

-----T-T---TcaT-T-T-----  
-----Tc--ATTT-G-----AG---TCacgagcctt  
ggctcgtcatttgttttgagaag-----T---T---AATAA-Aa--TC--C  
Ttttggttaacagcatttgcgtttgatc-----CGTCT-----C---T-----  
-C-----  
-----Cgggt

GTGACA

>GYPSY76\_LTR\_DR

TGTCAT-A-Tt-C-----T-----G-----AGC-----  
-----T---A---T-----TaTTT----GTT-Ttctccacaagatgtcgcca  
ttttcccagtgtttctgtttggttcatttggt-----  
-----  
-----  
-----  
-----  
-----TA---A---Ttt-GGt-T-CAGcTGTGTC-----TTGTtaag  
actagc-----CT-A---TATA-Tt----CTa--CC-----CTCTTG--T-Ct  
---T-C-AcTTG-TC-A-CT-Tggtttttgagtttgatgtgctaccgctggtgcccgaag  
-----  
-----  
-----  
-----  
-----TCCTc-TTgt  
tat-----TacC-TT-T-----T--G--TA--T-  
--T-T--TT-Ttg-----GCTatagtaccagttgctctacggagaactttatgtttgt  
taactgcttagcttttgagttcctatgtttttgctggcggt-----  
-----

-----  
-----  
-----  
-----  
-----T-T---T--TaT-T-----  
-----GatgATTT-Tgga----TT---TC-----  
-----C---Tt--AATAA-Ac--AC--C  
Tttgtttgaactagac-----TTTGTg-C----C---T-----  
-Tagcaattggggttcaccaactctccctgtggctcatcgttaaaccaactggctctactaca  
ccagcgacccggggttcgagccttgggct-----C-----  
ATCACA

>GYPSY107\_LTR\_DR

TGTCAG-G--a-C-----TcctggctG-----ATCggctgg-----  
-----T---T----CtaTC-----TgTTC--T-GTT-Tgtattagccacatgttcct  
ttgtttgtgcttctgattgtttctctccacctcctcgttctcataattttagt-----  
-----  
-----  
-----  
-----  
-----TG---A---TTtgCT--T-CACcTGTCTT-----TGCTtatt  
ttctcctcattagctcccCT-A---TTTA-Tt----CT---CTggg--TTTCTGc-T-Gt  
---T-C-A-GTG-CC-A-GA-Ttgttgtttgcttctgaccctgcaacatcaactataggt  
aaacttaatgtttttagttaaccttttctgtttgactccaggactctctccctaccttc  
ccagcctttctgtgtagtccctggcttgctcgaagtttttgctcttgctgctgagtt  
tttgatgtcctggacactggcgtggttctgacaattacacctgcctctgtttctactggc  
cagtctatTTTTTgttccctgggttatttccagtcattctcttcccctccatcaaagtctgc  
aagtatTTTTTgtcattTTTTTggttctcattTTTTTggactataatTTTTTggtt  
cttcttgatcaggctgagaggactgcttgctgaagagcattt-----  
-----TTTT--TTcc



-----  
-----  
-----  
-----TCCTg-TTga  
-----T--T-TT-CctaaagT--G--TT--T-  
--T-T--TC-Tccgtctg--CCTtcaagcctgttcccgtctgtttttgctttgccgcca  
tctgactctccgtccctatcctgccggccctcaacactctctcgccggcttccaagcctc  
agtcttctcgtggccattctgtcccagtcagcggcggcggattcatcgccccctgtcg  
ggatcaggggtattgcaccctcttgaagactgttcatctaacctctccggagtagtttta  
tttaatcgtttttgagactttatttctcagttttgagttttgtgaactttgggctttt  
ttgccaaactccattacggaggaatttttagtttcttttttgaagattg-----  
-----  
-----T-T---T--TgT-Tgac-----  
-----T---ATTT-T-----TTt--TGccccttgag  
tttgtgggc-----T---Tc--AATAA-A---CT--T  
Tgctgagacctgcatctgtgtctgaaccatcttc----TCTCT--Ca---C---Tcagac  
-C-----  
-----T-----  
CTGACA  
>GYPSY62\_LTR\_DR  
TGTCAC-A-Ga-C-----Tc-----G-----GTC-----  
-----C---Ca-----GTT-Aatcccctcaacaaccagca  
gaggtcccgtcaccgactactgaagttttaagaactccattaccacaagaccccgcg  
ggacct-----  
-----  
-----TG---A---TTa-CTg-TcCAGcTGAAAC-----CCATacac  
acaaacg-----CT-----TATA-Agcc--CTt--CT-----CGCCTG--T-Ca

---TtC-T-GTG-CGaA-GTcTtgTTTTgctctgcattcaattccaagcgttttcctac  
attatctgactgatttctgTTGCCgaccCGactgTTTgTTTaccTgtgattctatgccg  
cctgccagatcctt-----

-----  
-----

-----  
-----

-----GCCT--GTat  
cc-----T--C-GTaTa-----T--GtaTC--T-  
--T-T--GC-Ta-----CCTGcctacaactctgcttTgTgaccCGactttgagTgagT  
tcctgatctgatcttctcgtttTgTgaaacgtacat-----

-----  
-----

-----  
-----

-----  
-----

-----T-Tgc-T--TcT-T-----  
-----T--ATTT-G-----TGttgTG-----

-----T--Tc--AATAA-Ag--ACg-C  
Tgcaaatggatcccactt-----CGTCTgaCt---C---T-----

-T-----  
-----C-----

ATCACA

>GYPSY1\_LTR\_GA

TGTTAT-G-----TC-----  
-----CagcC----C--TGag---TaTTA--A-GTT-AagttggcgggctatTTata

attcttcggttatgtgttattgTTTactcacctctcgtttcagattcctcactccctccc  
tcaggtgtgtgggttccacctgggtgattgtcagcccctccc-----

-----  
-----

-----  
-----  
-----TG---A---TTg-TT--TgCACcTGGCCC-----TCATcacc  
cggt-----GT-A---TTTA-Gt----CT---GTggg--TTCCTG--T-Cc  
--T-CtG-TTG-CC-A-GT-Tcgtctttgataacaatgttcctagcgttccagcatttac  
tcctgatagcctccctggttaccgaccct-----  
-----  
-----  
-----  
-----  
-----GCCTggTTaa  
cgcgtcacg-----T--C-T--C-----T--G--CC--T-  
--T-T--TC-----CCTgccggataccttgccctggatcgactgcctgcccgt  
gtaccgaccttgaccggaacgtttacgacctttgcacctacctgcctcctgtcgaattc  
ttacaccggtgtttgtactgccatccaaacggtaaaattgg-----  
-----  
-----  
-----  
-----T-T---T--Act-Gcaac-----  
-----T---ACTT-G-----TG---TCtccgagtcg  
tg-----C---A---ATTGA-A---CC--C  
Acacc-----CTTGT-----C---Tgcac-  
-C-----  
-----C-----

CTTACA

>GYPSY4\_LTR\_AO

TGTTAC-A-Ga-Ccc---Tt-----G-----TC-----

-----T---Ag---C--GCa----Cc-----TT-Atcgaaggcggacacacaag  
gcagaataacgataggatgacgatggccgattcctgagtggaaggcaccgcgaatcgt  
ttatctagtagttattcggaaagggtacggacgccgataccagctaccacaacaagtc  
acgtgcatcgtagcagtgacacgaccaaacgtatcagcgacacgacaagctcgtagcact  
gacaaga-----

-----TAc--A---TCg-TA--T-CAC-TGACACgaagagTCGTagca  
gtgacacgacgggcaaggAT-A---TATA-AggacaCT---CA-----TTTATGt-A-Ct  
---T-A-A-GT--TT-A-GT-Tcttcgtgatcaatacacatggttactacagagttacct  
ttagtagcaagaccagtctcaactcgttcgactcttctaactattaagtatacgtactt  
aataggcctgg-----

-----CCCT--TTgg  
actcgagtctagtatcgacggcag-----T--C-TT-G-----T--G--TCga--  
---cT--GCaTc-----CCTgtgacgacggcagtctagtatcgacggcagtctagtg  
tcgacggaagcctcataacgactcccgtcttcccagaccgcaaccaacagcgacggag  
gtcaaagaacgac-----

-----T-Tcag-----  
-----G-----  
-----T--T--AGTAA-----CC--C  
Tcgaaa-----CGTGG-----T-----  
-Ccgctaactggtctcagacttgacgacgaagccccggg-----



-----C-----  
GTAACA  
>CGRET\_LTR  
TGTTAC-G--a-----  
-----C---C---C-----GTT-Atgcaggataacagttaacc  
gaccacttgggcatcgggaggctagaacaggacatttgtactgcaggatcacgggaaca  
acagggactcactcggaaacggaagaactatggtacaagtcacgtgatgataaggaatga  
gcatagataagggatccgcaatgagcgctcatcgggtatcggaatgagcgctcatcccac  
ttcagaatgagcgctcatagtgaccaaggggtacagcgctcatgacaataagggccattca  
gttaggaagacttgtatatagtagtactgagcccggctcaagatcagactcccatagct  
cttcagcaatcaacttgTG--A--TTa-TCc-T-CAG-AGATAC-----  
-----TTTC-Ag----CT---CAc-----CTTCCC--T-Gc  
gaaTtA-C-TTG-TTgA-GTcTaagactgatcacctta-----  
-----  
-----  
-----  
-----  
-----  
-----  
-----  
-----  
-----  
-----  
-----GCCT--CTga  
agac-----T-----T--G--AT--C-  
--T-A---C-Tgcag-----CCTacgaccaacgaccacgaccccagtgtag-----  
-----  
-----  
-----  
-----  
-----  
-----T-G---T--T-T-Aaacgtcaatc

ccc-----A---ACTTc-----TG-----  
-----T---T---AGCAG-A---CC--C  
Tac-----TGTCG--GatagC---Tga---  
-C-----  
-----C---

GTAACA

>GYPSY5\_LTR\_DR

TGTTGT-A--a-A-----Tgagggc-G-----ATGcaa-----  
-----C---C---C--TC-----T-----T-GTG-Caccaccagaggaaccatc  
gccagaattctgattcgactcacggactcaaaatcccataagcctgctacctggcac--  
-----  
-----  
-----  
-----  
-----TG---A---TTa-CGg-TcCAGgTGCAAC-----TCATcagc  
tctcgt-----GT-A---TATA-Tac---CG---CA-----CTCACGc-T-Cc  
gg-TtC-G-TTG-CGaA-GTcTtgatttgccctggctgtcatttctgagcgttccatactc  
cctgcttcggactgatctgtgtttctgaccctgtgcttgttctacgattacgaaagacat  
ctgcctgcccctgatctccagcctgttattctgaccagtaagatatccgcct-----  
-----  
-----  
-----  
-----GCCT--TTga  
act-----T--T-TG-Cc-----T--G--TC--Cc  
acG-T--TC-Tgtct-----CCTggattgcccctttgtgt-----  
-----  
-----  
-----

-----  
-----  
-----  
-----T-Tg--T--T-T-G-----  
-----T---ATGT-G-----TGc--TC-----  
-----T---T---AATAA-Ag--CTtgC  
Aaatggattcaatgc-----CTTCT--Ga---C---Tca---  
-T-----  
-----C-----

ACAACA

>GYPSY89\_LTR\_DR

TGTAAT-A-T--C-----Tca-----G-----CAC-----  
-----T---T---Ta-TCg-----Ca-----Tcctccaaccaccaggggg  
tgcacatggttgcctatactcctcaacattagatggcagtaatgactcttgctcctctaa  
actctcctgtaatcagcg-----  
-----  
-----  
-----  
-----TA---Acca--c-CA--C-CACcTGTTCT-----TTGCT---  
-----CT-A---TATA-Aga---CTg--CTt---TGTATGc-T-Gc  
---T-C-T-ATGtTC-A-GT-Cctgaactaaacctcttgctgccagttaagttgttctca  
agactttttgcttgcttctcaagacttgctttgctatcttgctgctttgattgctttgagacc  
ctcgtgtctatctttatcttgatgtatcttcaggaagctcggctt-----  
-----  
-----  
-----  
-----TCCTa-TT--  
-----T--T-TG-T-----T--G--TA--C-

--T-T--TT-Caa-----CCTtgctgtagagagatattatctctcc-----

-----

-----

-----

-----

-----

-----

-----T-T--T--T-T-G-----

-----TcaaATTTa-----C-----

-----C---Tc--AGTAA-Ag--AC--T

AtattatTTTTTggaaattcatcagttgtggactcacTTTGT--Tc---C---T-----

-Cctctgctcttgggccaccagctgctgacttagctcatctagtaagatctactgctaac

cacaccgcagaccgggttcgatccccactcagat-----C-----

ATCACA

>GYPSY96\_LTR\_DR

TGTCAC-A-Tc-C-----Tcagtct-G-----ATCatgctgt-----

-----C---Tg---T--TCcc---CaTTTc-T-GTT-Tacttctggtgagcgcacgt

gaatgtttattttgatcgctccccgatctctcctccctctcgttaccctattaccatc

tattaagat-----

-----

-----

-----

-----TG---A---TTttCAC-T-CACcTGCACC-----CTATcagt

gattcctctcgtgtc---CT-A---TTTA-Ttc---CC---CTc---CTTGTG--T-Gt

ag-TcC-A-GTG-CT-A-GA-Ttgttgttttgcgagcgcgcccacgcgagccgctcgcg

tctgatctcgtcttgtctcctgctcgtggctctcctgtcctttccaactctgtcttgttgt

gctgctccacgccagaaccatcttcttgcactttgcctctccttaacctcctctgttccc

aggccggactgcttcaacctctcggagcccatcggcttcaactgactgccggcttctct

ccctcgcctcacgctccacttccacattcccctcacggcaacgtaccagcacgccccctgc



tctctccagtcctgtcgtggttggttggttatcccttccagttgtgtctcgcctggccg  
tcacttacttctagcgtctgtccttcttgtgtgtgttccatthttggctcatatccctc  
tgttctcaggcaccgtcatccccctccgcactgagttctccgacatcacctgccgtccgac  
ttccccctctccctcgtcgtctcgtcggtcacatctaaaacagccggggccatagtgcgc  
cctctaccggaggagtttgtaaggacattcttttctcattatatttttgctgtcttaacc  
ccg-----

-----GCCT--TT--  
-----T-TG-T-----T--G--TT--T-  
--T-T--TC-T-----CCTtgtgtgcagcgcgccactggccgagagactctgtttt  
ttgaccctcggaaatttttatttttctcttttcaaaccggtaacggaggaggtcctaaa  
gactatttatttgatc-----

-----  
-----  
-----  
-----  
-----  
-----T-T---T--T-T-G-----  
-----G---ATTT-T-----TG---TGttatttttt  
ggctgttattttgtggccctgactacagtctttgctgT---Tc--ATTAA-A---AT--C  
Tttaatttgaacctgcatt-----TG TGT--C---C---T-----  
-Tccagtcccatt-----  
-----C-----

CTGACA

>GYPSY88\_LTR\_DR

TGTCAG-G--g-T-----Ttt-----G-----CC-----  
-----C---T---T--TGt----CaTTTT-A-GCT-Tttcctgtaatgcttttttt  
tgtccactagatgtcgtcatttagtagttttctatttggtatccgtaatcattg-----  
-----  
-----  
-----

-----  
-----TC---A---TTg-AtT-T-CACaTGTGCC-----TTGTttag  
tttctt-----GT-A---TTTA-AgtagcCT---CAgt---TTCATC--T-G-  
---TaC-T-TTGcTC-A-GT-Tattgtggattcaagcctgtcaaccactgtgagttactt  
tttgtaaa-----

-----GCCTc-TTaa  
ttataactctaagctctttaatgacttata---T--C-TT-T-----T--G--TG--T-  
--T-T--GT-Tgagttca--ACTgttcaggtgtttttgcctactttttgagttttgtatt  
tttggatattggaggactctgtttttgcctctctttacttttatcac-----

-----T-T---A--T-T-Gaa-----  
-----G---ATTT-T-----TT---TG-----  
-----TcaaT---AATAA-AtttCCa-C  
Tgagaagcaagttgcc-----TTTCT--Tc---G---T-----  
-Ctgggttcttcatctcccagtagctcagtagggaagtcattcacctctcatgccagaga  
cccgggttctatccccgat-----C-----

CTGACA

>MARY1\_LTR

TGTAAG-GgGa-C-----Tagggg--G-----GTG-----  
-----C---C---C--TG-----TgTGT--T-TTT-CctatTTTTatgttcgtcc

catatTTTTccccacctcatttccttctattcttcattttcta-----  
-----  
-----  
-----  
-----  
-----TG---A---Ttt-TT--C-CA---GA-TT-----TTATta--  
-----CTaA---TTT--Tcc---CTtg-CT-----ATCATGttT-G-  
--T-A-T-ATG-TTgA-CAcTtttatatttagaggcggagtacccttccgacacatac  
cccttggtatgatgtcattcgggcgccttgatccgcctatctcc-----  
-----  
-----  
-----  
-----  
-----  
-----  
-----GCCT-----  
-----T--T-TT-C-----T--A--TT--T-  
--T-TagGT-T-----  
-----  
-----  
-----  
-----  
-----  
-----  
-----  
-----  
-----  
-----aT---A--T-T-T-----  
-----G---ATTT-T-----TGtcgTC-----  
-----T---Tc--A----cAt--ATa-C  
Tgggcatcagcaaggggatccttagagt-----TTTCT-----C---T-----  
-Tcggatttccctttgctaggtgcgcccccaatccctgtattatgtagcataattttaac  
tttgatttccctttgctagaggctcaggttgc-----C-----



CTTATA

>GYPSY104\_LTR\_DR

TGTCAT-G-Tc-C-----Tcg-----G-----TTTgatcatctgggccactgggt  
g-----T---Tg---T--TGt----TgTTT--T-GTT-Tgtattatctatgtgccttt  
ccctagcatgttttgttttgatcctccgccacatgccttctgtttactctctaattccac  
gcccacctcctgtttaagctattacgttattaagt-----  
-----  
-----  
-----  
-----TA---A---TGt-CAC-T-CACcTGT-TC-----TTCTtgat  
ttctccct-----CT-A---TTTA-Ttc---CTt--CC-----CTTAGCgcT-G-  
---TcC-T-GTG-TC-A-GA-Ttgttgtttgcccttctcgtgttccctcgatctcccg  
tcctgtccagtcagcctttttcctgttgtatctgaatcccggctcacatctttgattttg  
cctttttctgctaccaggcccggtcccggttagtttcattcctgctgctcgctgtctct  
tctctccgcttcagcgatccattttccggcctcctccagccccgcagcgetctctctcc  
tcgcggggtgctcgcgccaggaaacgcgacccagcagtatcgccccctgccggcggtacc  
tattattacaccctctgggagaagcctgtcctctctacgaagaggtttttgttccttggt  
tttttgttggatttttcggacatttttgttacatttttt-----  
-----CCCT--TTtt  
tctgactttag-----T--T-TT-C-----TaaG--AC--T-  
--T-T--TT-T-----CCTctacggagagttaagttaag-----  
-----  
-----  
-----  
-----  
-----  
-----  
-----  
-----  
-----T-T---T--T-T-Tccctctg---  
-----G---ATGT-T-----TT---TGagaattctc

catagtgaag-----C---T---ATTGA-Ac--AT--C  
Tta-----TTTTC--Ct---C---T-----  
-Tcggagctgtttttgttgaagaacctttttcccatctgagtttgctattttgcttatat  
ttgaataaactgtgaaggacctgcatttggtgtcttctgtttgccttgatcagatcC----  
CTGACA

>GYPSY-115\_LTR\_DR

TGTCAC-G--g-T-----Ttatg---G-----ATCtgtgtg-----  
-----T---Tc---C--TC-----C-TGTa-T-GTT-Atgtatcatgccttgtgtgt  
tgtcatgtgtgaggggtgtgtgtttgtttaccttttgtgttgacagcgtgctaggatcagc  
tgatgtcatcagctgactta-----  
-----  
-----  
-----  
-----TC---A---T-c-CT--C-CAGcTGAACC-----TCATttgg  
ctgg-----CT-A---TATA-A-----TT---C-----CTCCTG--T-Gg  
---T-A-T-GTG-CT-G-GT-Tatcagtcctgt-----  
-----  
-----  
-----  
-----  
-----  
-----  
-----  
-----  
-----  
-----  
-----TGTT--GTcc  
-----T--T-GT-T-----T--G--TC--C-  
--T-T--GT-T-----CCTgactgttgtctcccagtatcctccgctgtctgtttga  
tgcwctcgttgtggcctgtggctctctt-----  
-----  
-----  
-----

-----  
-----  
-----T-Tg--T--T-T-T-----  
-----Ga--ACTT-Tcg-----TG---TGtcctctg--  
-----T---Tc--ATTAA-Aa--CA--C  
Tcgcatttggatcctc-----CTTGT--Ctaa-Ga--T-----  
-T-----  
-----C-----

GTGACA

>GYPSY-170\_LTR\_DR

TGTCAT-GgT--C-----T-----G-----TCacctgca-----  
-----Tg--T----Tg-TCacagtCaTTCg-T-GTT-Tgttttctcgtagcacatgg  
cattgttttgacagcgcgcatgtgctccactgcctcactccaccacttatcaggttac  
tcattagatcattatt-----  
-----  
-----  
-----  
-----TC---A---TTa-TT--CgCACcTGTCTC-----TAGTctta  
gccttatgagtctcc---CT-A---TTTA-T-----T---CT-----CCTCTC--T-G-  
---T-C-A-TTG-TCt-tGTaCcgggcgttagtggtttacctcacgcggtggcctctt  
agatcgtgtcctgtcttgtatccatTTTTgactccagtgccagTTTTTTTTgatttc---  
-----  
-----  
-----  
-----GATT--TTgt  
ggtttggac-----Tg-T-TT-Cc-----T--G--TT--T-  
--T-T--TC-C-----CCTtttatcagatcgcctcgcctgctatcagttgtggcag

acgcttccctctccacttctgcttcagccttttctatcccgccaccagcgatcttctc  
cctctctggccgccttgtatcccgccgggcgctttcacttcggcggtgatactgctgt  
gtttcccgtttgactggagagttggaccaccgtgcgctcctgctggaagcactttatat  
tgcccttcacctgagttaccatttctggtttttgactgagagttggactgccgtgcmc  
ctcctgctggaagcacttagtattgcctgtaattataccttccggtttttgcccctttttg  
actggcgactttggatcgctgagcgcctctgttgaactttctttatttttttggca  
gtattttgtgctttttctgtggcatttacagcaccct-G---T--GcT-G-----  
-----Aga-ATTT-T-----TTgt-TGtataatatac  
ccctctgcaggccact-----T---TagtAATAA-Ata-ATt-C  
Tg-----TTTTT--Cc---C---Tg----  
-Catttgattcctcctgattttttataactgacacttg-----  
-----T-----

ATGACA

>GYPSY145\_LTR\_DR

TGTTTT-G-Cc-C-----C-----Gcataca----ATT-----  
-----C---Taag-Cg-TT-----T-TTCtct-GTT-Agtgatctgattctgtgttt  
tgaccccagactgtttttcccgtttct-----  
-----  
-----  
-----  
-----  
-----TG---A---TTg-TTgaTgCCGcTGCCTT-----TTGTgacc  
ctctg-----CT--cagTTTA-A-----CG---GAac---ATTCTctcT-Gc  
---T-G-T-ATG-CCg-cCTgTctcgaccaatcgctgcccacggactctgagttaagtt  
tctccttcgcca-----  
-----  
-----  
-----

-----  
-----TCCTtgTT--  
-----Tg-T-TG-T-----T--G--TC--T-  
--G-A--TC-Ctg-----CCTgtacgaccatcc-----  
-----  
-----  
-----  
-----  
-----  
-----  
-----  
-----Tg-----  
-----TT-G-----TGat-TCaacaagct  
g-----C--A--AATGG-A--TC--C  
Tcaa-----TCTCC--CgacgC--T-----  
-C-----  
-----C-----  
TTTACA  
>GYPSY164\_LTR\_DR  
TGTCACcG-TacC-----Ttgt---G-----TTC-----  
-----T---Ca---C--TC-----TcTTC--A-GTT-Ctatgttacagattaccttc  
agtcacctgcttttctagtattcacaggtcatcggag-----  
-----  
-----  
-----  
-----  
-----TG---A---TTtgCT--C-CACcTGTTTC-----TCATccct  
ttgтта-----CT-A---TTTA-Tag---CTtgtCA-----TTTCCct-T-Ca  
--T-G-T-TTG-TC-A-GT-C-----  
-----

-----  
-----  
-----  
-----  
-----  
-----  
-----TGTT--GT--  
-----Tg-T-TG-G-----T--G--TG--T-  
--G-T--GTaTaacgg---TCTgttactcaccatatttgtgtccacggctgccagtg  
aacgagtctcccgttgtttctggaatgtttccacggcactcccctggcactcaccegat  
tggggtt-----  
-----  
-----  
-----  
-----  
-----  
-----T-T---T--TgT-T-----  
-----T---ATTT-GcaaagacTT---TCtcc-----  
-----T---T---AATAA-A---CA--C  
Tttgtgttctgcacttgagttcactc-----CTTCT--T---C---Tac---  
-C-----  
-----C-----

GTGACA

>GYPSY159\_LTR\_DR

TGTTGT-G-Aa-----ATC-----  
-----Cac-T---Ca-TGaa---CgTTCC-TcGTG-Tgaccaccagaggagccat  
cgctgagttctaataatctccccaaggctcgactgggac-----  
-----  
-----  
-----

-----TG---A---TTa-CA--TaCAGcTGAAAC-----CCATttca  
gactct-----CT-A---TATA-Aa----CG---CA-----CACATCctT-Ca  
c--T-C-G-GTG-TGaA-GT-Tttgattagccccggccatcatctctgagcgta-----

-----  
-----  
-----  
-----  
-----  
-----

-----CCTT--GT--  
-----Tg-T-TTaT-----T--G---C--C-  
--T-A--TC-TgtgtatcgaCCTggactgtcttaccgtttctgaagctatctgcctgcct  
tgaccactgcatagttatattgattccttctgccagccgcctgcctagaatctctgcctg  
tctctcgttaacgatcactctctcctagccccgacccacgcctgctcttcgactattcta  
ctggaaagttcaa-----

-----  
-----  
-----  
-----  
-----  
-----

-----T-T---Tc-TaTcT-----  
-----G---ATGT-T-----TG---TGagtttccgg  
ctgtgatatcttactg-----T---T---ATTAA-A-----  
-----GTGTg-----

-----  
-----  
-----  
-----  
-----  
-----

----CA  
>GYPSY69\_LTR\_DR  
TGTAAC-A-Aa-CagaacT-----GacaaccactcATCcaacctgcagagggagccct  
caccggaaT---T----C--TGa----C-TGTc-A-GTT-Cttcgttggttacttctgt  
ttgggtggccatattaacctggccacaccaaactcaa-----

-----  
-----  
-----  
-----  
-----TGcgaA---GTa-TTg-C-CA---GTATC-----TGCTgcct  
taccaagc-----GT-A---TTT--Tcc---CT---GT-----TTGATC--T-G-  
---C-CtT-TTG-TT-AtGA-----  
-----  
-----  
-----  
-----  
-----  
-----  
-----  
-----  
-----  
-----CCT--TTga  
gcctggtccttttgactactgattttggaagacTg-T-TT-T-----T--G---C--C-  
--T-T--GT-Ttg-----CCTtggtggacactctgtttggtactttgaacctgcctgc  
ttttgactacgatttagcctag-----  
-----  
-----  
-----  
-----  
-----  
-----  
-----  
-----  
-----  
-----  
-----  
-----T-G---T--T-T-T-----  
-----Gg--ATTT-G-----TT--TActattta--  
-----C---T---ATTAA-Ac--TT--C  
Ttgcatttggatcccatc-----TGTTT--C----CatgT-----  
-Cgtcaccaccgcat-----  
-----T-----

GTCACA



>GYPSY138\_LTR\_DR

TGTAAC-G--g-T-----Ta-----G-----TAC-----

-----TcgaT---T--TCc---TcTGCatT-GTG-Tgtagtagagatg-----

-----AG--A--TT-----TGACAC-----CCA-----

-----A-----T--CA-----CGCCTCa-Aa--

-----C-A-GA-T-----

-----CACT--TT--

-----aTT-C-----T--G-----

-----Gcaaa-----

-----C--Ac--AATGA-Aa--ACa-C

Agtgatcagtcaccagac-----AGTCC-----  
-----  
-----  
--AACA  
>GYPSY64\_LTR\_DR  
TGTCAG-G-Tc-C-----Tctgtct-G-----ATCac-----  
-----C---Tggg-T--TC-----gTTTg-T-GTT-Ttgcacttgtttacatgat  
ttcagcacgtgtgggtgttttgatcgctctctcattacatacttgctttgacacatctcct  
cccatcttcccactcatccctattattcaattaaac-----  
-----  
-----  
-----CA---A---TTt-CAc-T-CACcTGTCTTc-----CCGTaatt  
tcccct-----CT-A---TTTA-Aag---CG---CT-----CTCATGt-T-G-  
---T-CaT-TTG-TC-A-GA-Tcgttgtcgtttggttggtcagcgtgcactgtttcac  
tagtccagtcagtcagttcctgttgtctcgcagccgtcttctggttggttt-----  
-----  
-----  
-----  
-----  
-----TCCT--TTta  
ttt-----Ta-T-TT-C-----T--T--CA--T-  
--T-T--TT-Tgacc-----CCTctctgtcatctgcaggacctgttctgttttgtttat  
ccgccgtggttgccgattgtctccgatccccggcttcaatattccctcccgtcacctgc  
tccactcttcttctccctctcggctctgcgcgccggatccagtataccgctgtatcg  
ccccctgccgagtgaaacttgaaattacaccctgaaagacattttgtcccttctacggagc  
ggtttctgttgacagtttttttagctcttcttctgaacaaccttgaagtttgttttagt  
ttcattttgttaattttatttgcctgagtcocctttaaagatcccagtaataattatatcc





TGTTAGGT-Atggagcctta---A-TG-G-----  
-----ATAT--catcgacgctgcatttctg  
ttattgtccgccagctgcatagaaactgtctgaatgacgtaa-----  
-----  
-----AtC-----GTCATg----AAccgc  
tg-----AtGtAGC-G-Aaatt-----TGTAATT-AgTTATt-AACT-Caaaattg----  
-TATGCA---Ttcc-----t-ATTTTC-T-AaTA-----TcG-A---GTAGG  
tctcac-----GCA--tT-----AA----TT-----  
-----ATTg-TAATTctt--AT---AAG  
TA-AtAAAtt-----AGCaTtTAAa-----A-TCA-----Ttttt  
ggTtT-TTTTTctatCTGCCGT-----CTgcagtatacg-----  
-----  
-----T-A-A-T-T--

>GYPSY41\_LTR\_AG

AGTTACGT-Agaccg-----AATA-----gctgagtccacgtaataagaagccaacacgt  
gg-----ACACGCgcaccgagcaacgaccgcat  
caccggaacacgcgcgcat-----  
-----AgCAaCATGACGCgc---AT----  
-----aGcAACgGgAaccggcacgTGGACACgC-GCAT--ACCG-Ga-----  
-TATGCA---gagtcag-----c-AGCTA-T-AgGG-----TaG-AatcGAAGG  
-----CtaggtgcattGTAGAAtTtaagaaataAG----TT-----  
-----AGTtgTAATtTgg--ATc--AGC  
TC---AGtghtaagaagcgttgCGC-TtAAGca-----A-TAA-----Agt--  
---TT-TTTTTt---ATGAAAC-----GTgaagccttgactta-----  
-----  
-----T-A-A-T-T--

>GYPSY40\_LTR\_AG

AGTTATAT-Gcgtgg-----AACa-----caa-----

-----ATAC--aggtgcgacatcactgcaac  
agcctcgcacc-----  
-----  
-----CAtGCCGATACg----AT-----  
-----aGgAGCcG-A-----T-----T-C-----CG-T-----  
---CGCG---T-----CagATCGG-T-A-TC-----AgC-At--CCAAG  
-----Cgataagcac-GCA--aT-----AA----TC-----  
-----ATT-----TT---AAA  
TA---AA-----AGC-TgTGG-----  
---Ttc-----CATA-----CTca-----  
-----  
-----T-A-A-C-T--

>GYPSY39\_LTR\_AG

AGTTATGT-A-----CACa-TGcG-----  
-----CTACGCgctatgatacaggtgctgag  
taagaaaacggtcgcgaagcgagccatcgatggtactccacgcgaggagtcagttccaac  
gggaactccactggaagcaggttcccacg-----  
-----AcCA-GGTGTGGTgtcgtATgttc  
ag-----AcGgACC-G-Aggcaaca--TGATCAT-C---ATa-AACG-Tg-----  
-GACGAC----aacgtgaccggca-a-ACCTGg-c-aGC-----Ac-c----GAAAA  
-----Ca-----CCAGCcT-----AG-----ctaatagtaccgaatcc  
agaagttagcttt-----AGTc-TTAGT-----TTagcAGT  
TC-GcAAA-----TaAAGatcccc-----AgTAA-----Tggt-  
---TT-TTTTT-----AAAA-----CTtactccgggctatcgtaaaca-----  
-----  
-----T-A-A-T-T--

>GYPSY42\_LTR\_AG

AATTATGT-----ggataaccattattaaccttggtactggta  
taacggtg-----ATACGCgtggctgtagtggcagcttt

gt-----  
-----  
-----GAcGGTGACATtcg--ATcg--  
-----A-G-AGAcG-A-----T-----C-TGAT--AACT-Ctc-----  
-TTT-----ttccgt-----t-ATCTCc-c--GAgcagtaca--G-AcgtCTAGG  
-----A-----CGAGA-T-----AGgtttTT-----  
-----TTTc-TTATTtttttAT---AGT  
TA--gGAGtt-----AGGaTtTAGgttatgttagaA-TAAgtagttTa---  
---TT-TTTTTgtaaATAAAAA-----CT-----  
-----  
-----T-A-A-T-T--

>PIFO\_LTR

AGTTAC--cAcagtcac---CACa-----ccccctaaaccc-----  
-----CCACGCctacaccactgaacacatcg  
acgcccacatgggcactccggtacaacgaaccgggaaacgaataaacaatgggtcaacaat  
gtatctacaatgtatcgacatccggccaaaatgctgacactaacatcagcagaccagacg  
gcaagaatgccgatgcagcataagaacctagcata-AcC-----CTTATat---AT----  
-----AaG-AAC--tA-----TGTAActT-A-----g-a-----  
-TTTGTA---ggc-----t--TCTT-G-A-GA-----AgA-Ac--GAAAG  
-----Aaat-----aT-----AGaa--TC-----  
-----ACTctTAAGT-----TTg--AAC  
CC----AA-----AGCgTgAAG-----  
---TT-GTGTTa---CTGAATC-----CCatacaagtgcctgaacaaaatctcatgca  
aagtgccgacagccgactataagcgaaccaccaacatctttactgctggtatattcacc  
tcccatcattcggcccgaatggT-A-A-C-T--

>GYPSY8\_LTR\_DYA

TG--ACGG-----CACa-----agcatgccttcacctccccgaaacccccac  
gggcagcgcactacatatgagacactcaaccggACACACaccgcagcaaagtcatcaac  
ccacactggatcagcagagt-----

-----  
-----CAG---GATTCcc---AAGaat  
ccaaccgAaGcACTgGaA-----GGGGCAT-C-----CG-Ggtgaaaagtgc  
cGACGCA----agg-----g-GTTTCg-c-aGA-----AcA-Aaa-GAA--  
-----Ttgtacg----CTAGGcT-----AA-----gaggaaaatttattcaaa  
aaataaaatcattctgtcaccgaacttcgaacgagtcACTt-TAA-----AT---ACT  
TA---AAatcctcctt-----GGCtTaAAG-----A-TAA-----Aa---  
-----CAGAacagatcCT-----  
-----

-----c-g-a-c-ca

>hmmcons

AGTTATGT-A-----CACa-TG-G-----  
-----ACACGC-----  
-----  
-----TA-CA-GGTGACAC-----AT-----  
-----A-G-AGC-G-A-----TGAACAT-C-TTAT--AACG-G-----  
-TATGCA---T-----C--ATCTC-T-A-GA-----A-A-A---GAAGG  
-----A-----CCAGA-T-----AA---TT-----  
-----ATT--TAATT-----TT---AGT  
TAAA-AAA-----AGC-T-AAG-----A-TAA-----T-----  
---TT-TTTTT---ATGAAAA-----CT-----  
-----  
-----T-A-A-T-T--
